# Supplementary material
Source: PubMed Central journal article supplement (PMC11022830)

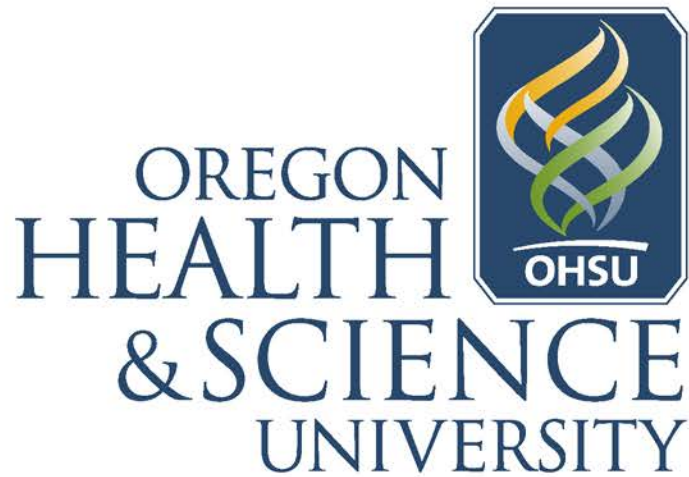

# Hormonal contraception & drug interactions

Alison Edelman, MD, MPH

Professor, Dept. OB/GYN

Director, Family Planning Fellowship

Associate Scientist, Oregon National Primate Research Center

# Disclosures

| Name                        | Type of reimbursement                                                      | Role                                                   | Date                         |
|-----------------------------|----------------------------------------------------------------------------|--------------------------------------------------------|------------------------------|
| Up to Date, Inc             | Yearly Royalties received                                                  | Author                                                 | Ongoing                      |
| Genzyme                     | Hourly rate payment                                                        | Consultant                                             | One time consultant 2/2013   |
| Agile Pharmaceuticals       | Honorarium                                                                 | Advisory Board                                         | One time participant 4/2012  |
| Merck                       | Honorarium                                                                 | Trainer                                                | Ongoing                      |
| NIH grant funding           | Grant support                                                              | Co-I                                                   | Ongoing                      |
| Gates funding               | Grant support                                                              | Co-I                                                   | Completed 1/2015             |
| Society for Family Planning | Grant support                                                              | PI                                                     | Grant support ongoing        |
|                             | Honorarium                                                                 | Author                                                 | One time honorarium (3/2013) |
| CDC                         | Travel reimbursement                                                       | Technical expert                                       | 3/2013, 2015 (ongoing)       |
| ACOG                        | Honorarium received one-time (2012). Reimbursement for 3 meetings per year | Member of Scientific Committee (2011-2014)             | Role completed in 2014       |
| Projects in Knowledge       | Honorarium                                                                 | CME faculty                                            | Role completed in 2013       |
| Contemporary Forums         | Honorarium and travel reimbursement                                        | CME Faculty. Meeting occurs annually.                  | Ongoing                      |
| Gynuity                     | honorarium                                                                 | One time consultant 2/2013                             | Completed 2/2013             |
| WHO                         | Travel reimbursement                                                       | Member of the MEC steering committee (2013 to present) | Ongoing                      |

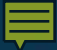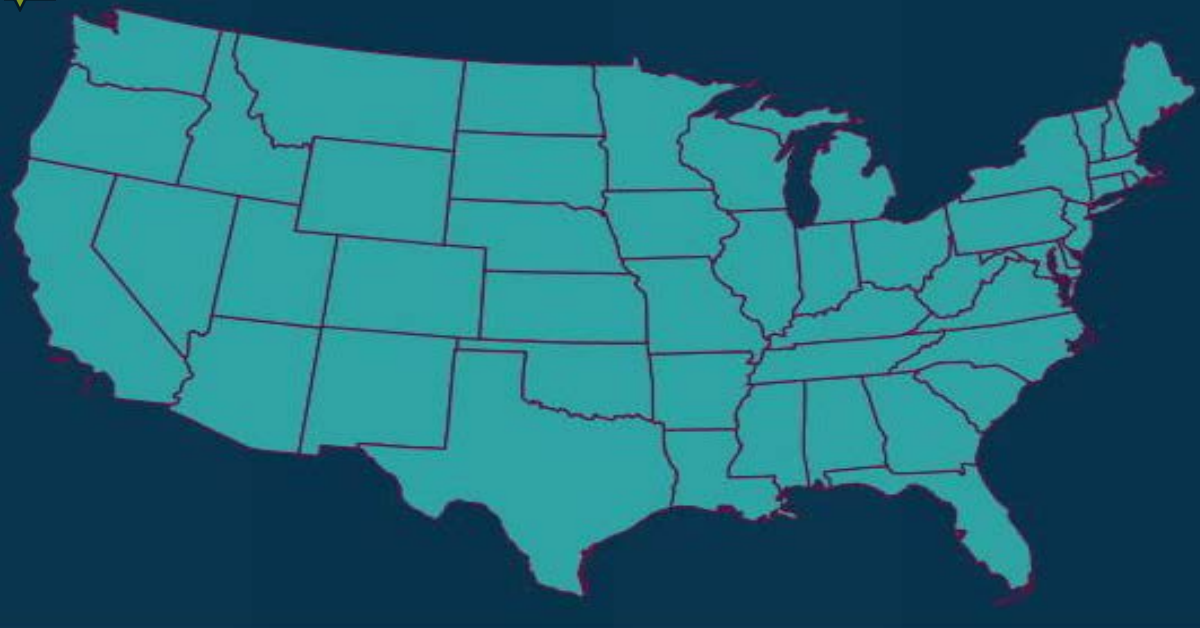

61 million US women in childbearing years

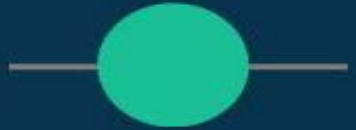

62% using a contraceptive method

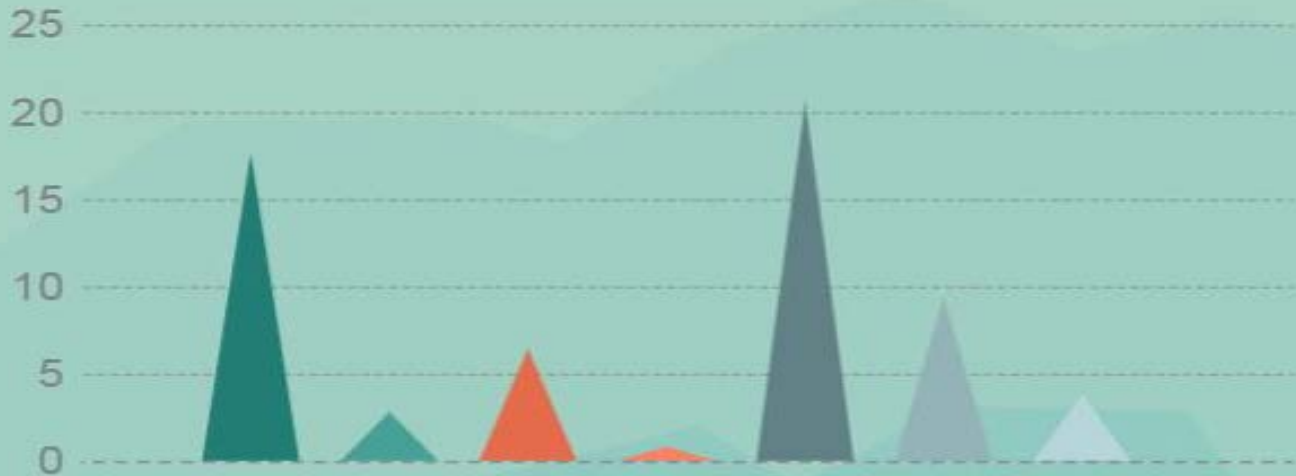

- Pill/ring/patch
- Injectable
- IUD
- Implant
- Permanent (male/female)
- Condoms
- Fertility awareness/withdrawal

# Contraceptive steroid hormones

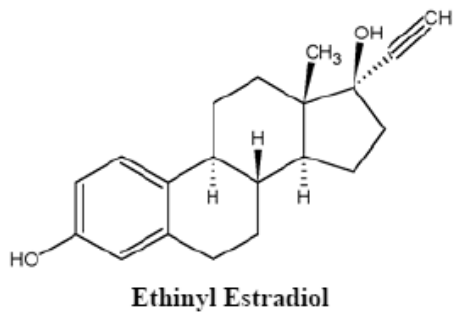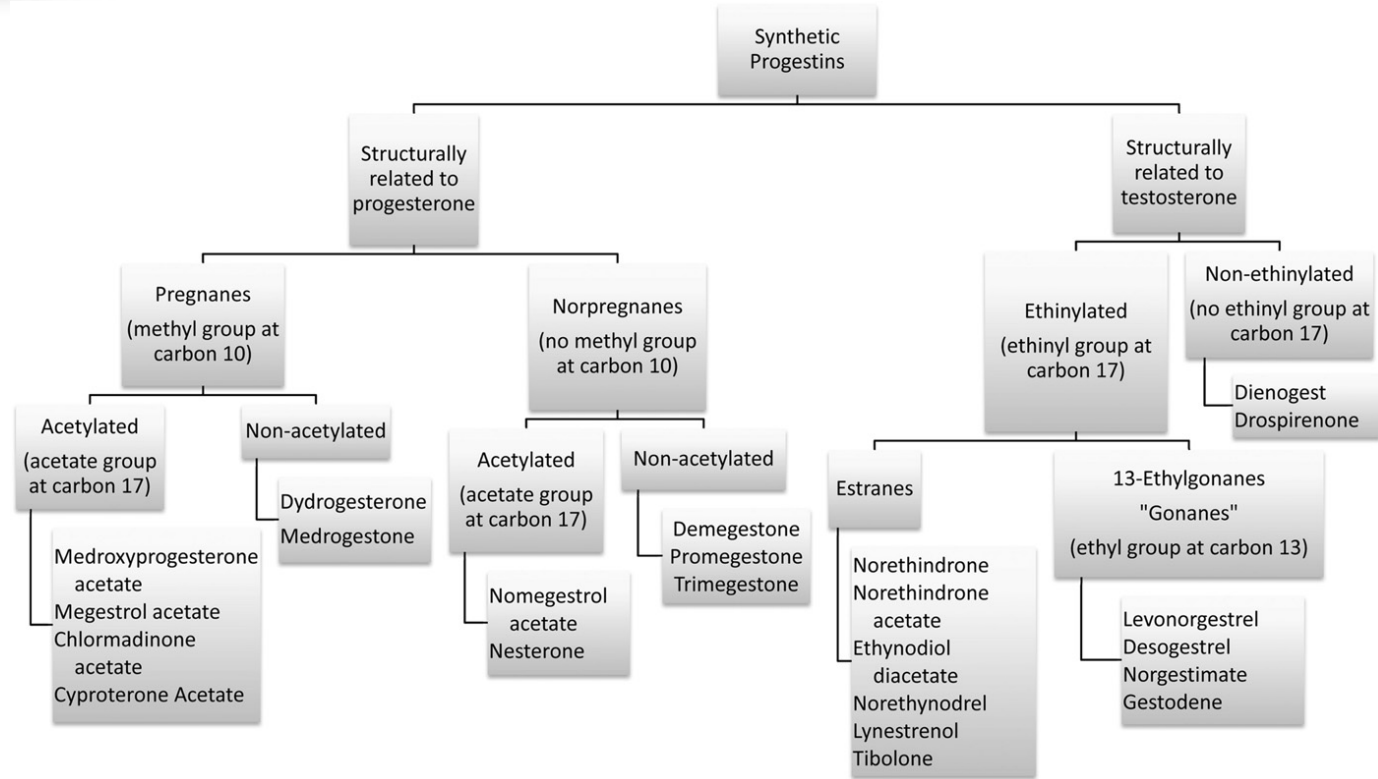

# VTE risk is related to estrogen dose

*Combined OC users*

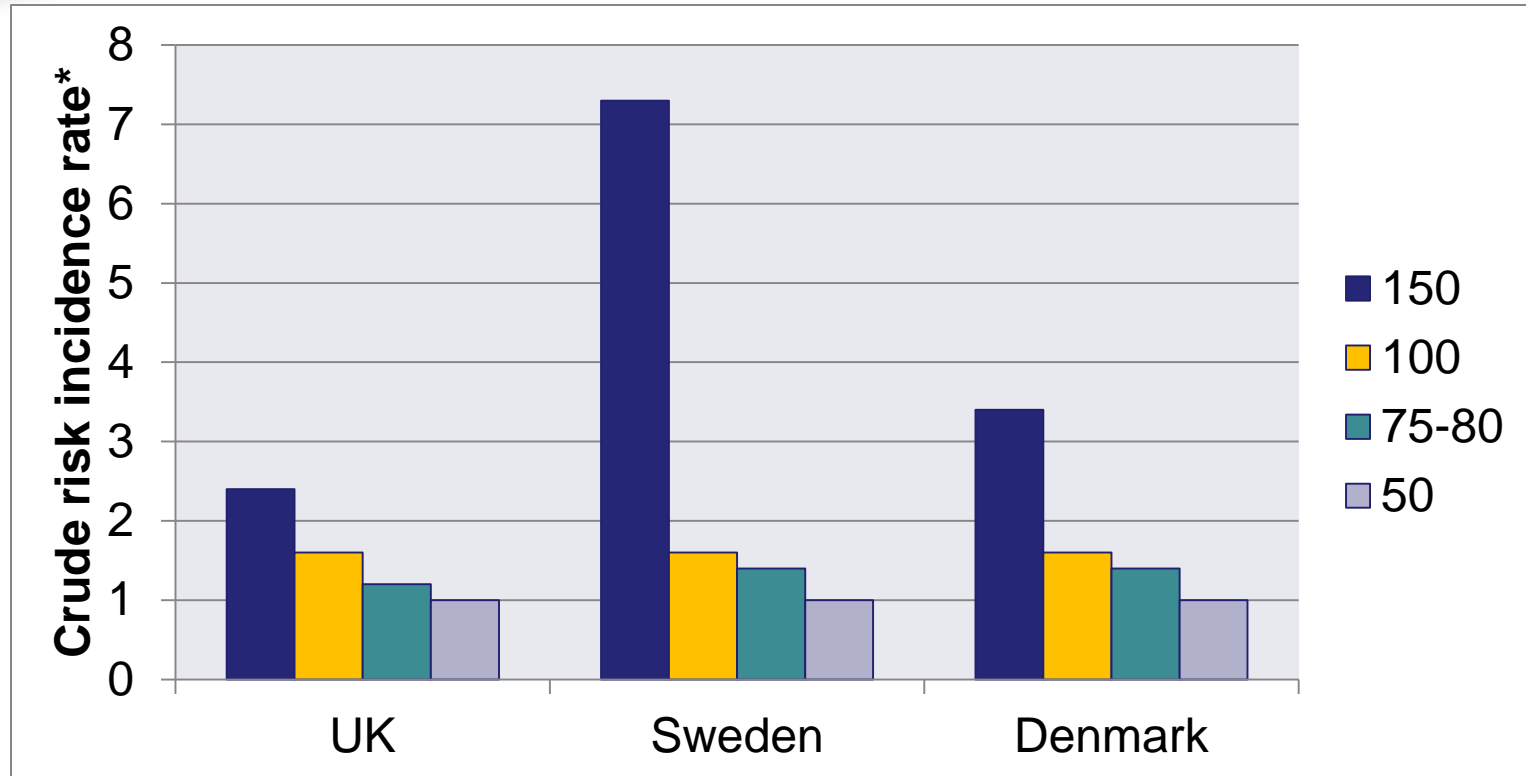

Rate with 50 mcg EE referenced to 1.0



**Efficacy x adherence x continuation**  
**Fecundability x coital frequency**

# Threshold for contraceptive efficacy

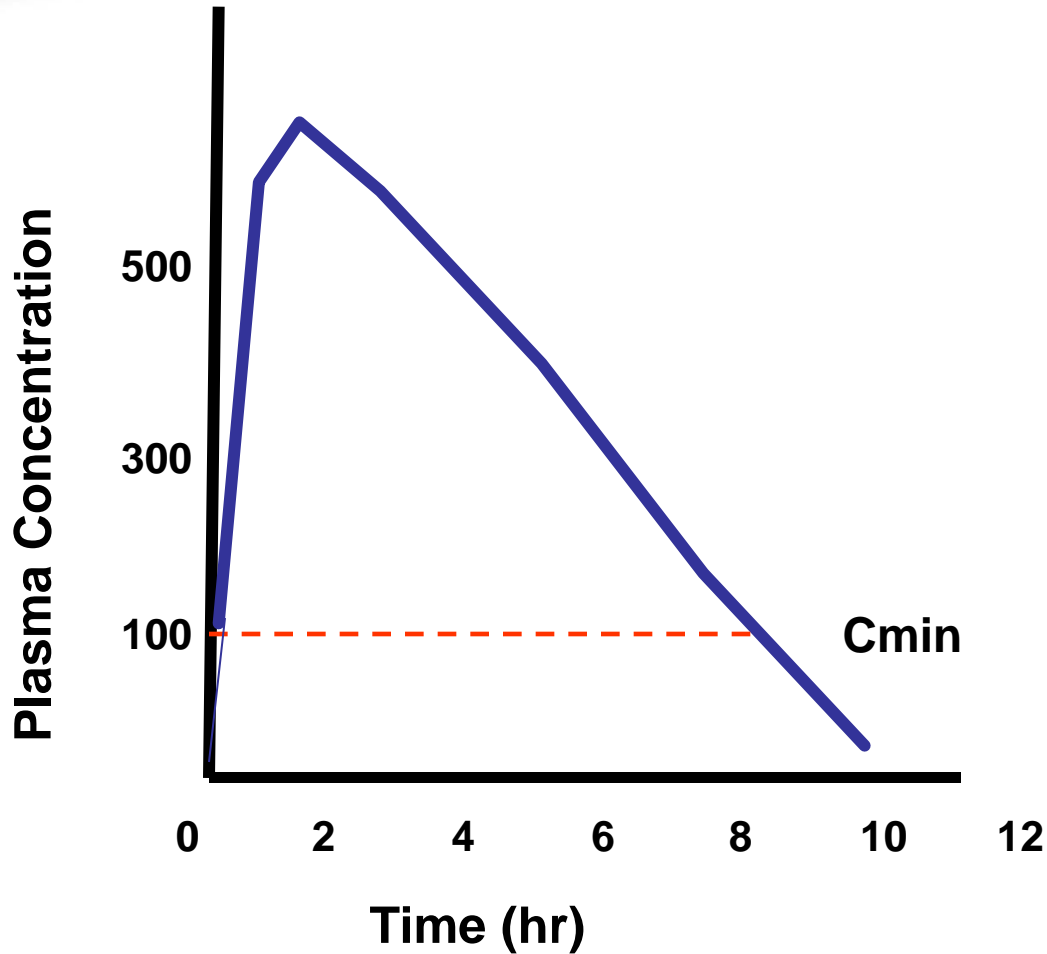

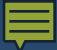

# Prescription drug use

|          | <b>2009-2012<br/>All female persons<br/>Rx drug use in past 30 days</b> |              |
|----------|-------------------------------------------------------------------------|--------------|
|          | At least 1 Rx                                                           | 3 or more Rx |
| Under 18 | 23.8%                                                                   | 3.1%         |
| 18-44    | 46.4%                                                                   | 11.8%        |

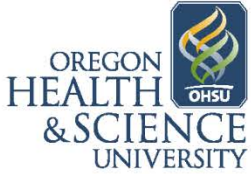



# LEADING CAUSES OF YLDS, 1990 AND 2013, AND PERCENT CHANGE, 1990-2013

- Communicable, maternal, neonatal, and nutritional diseases
- Non-communicable diseases
- Injuries

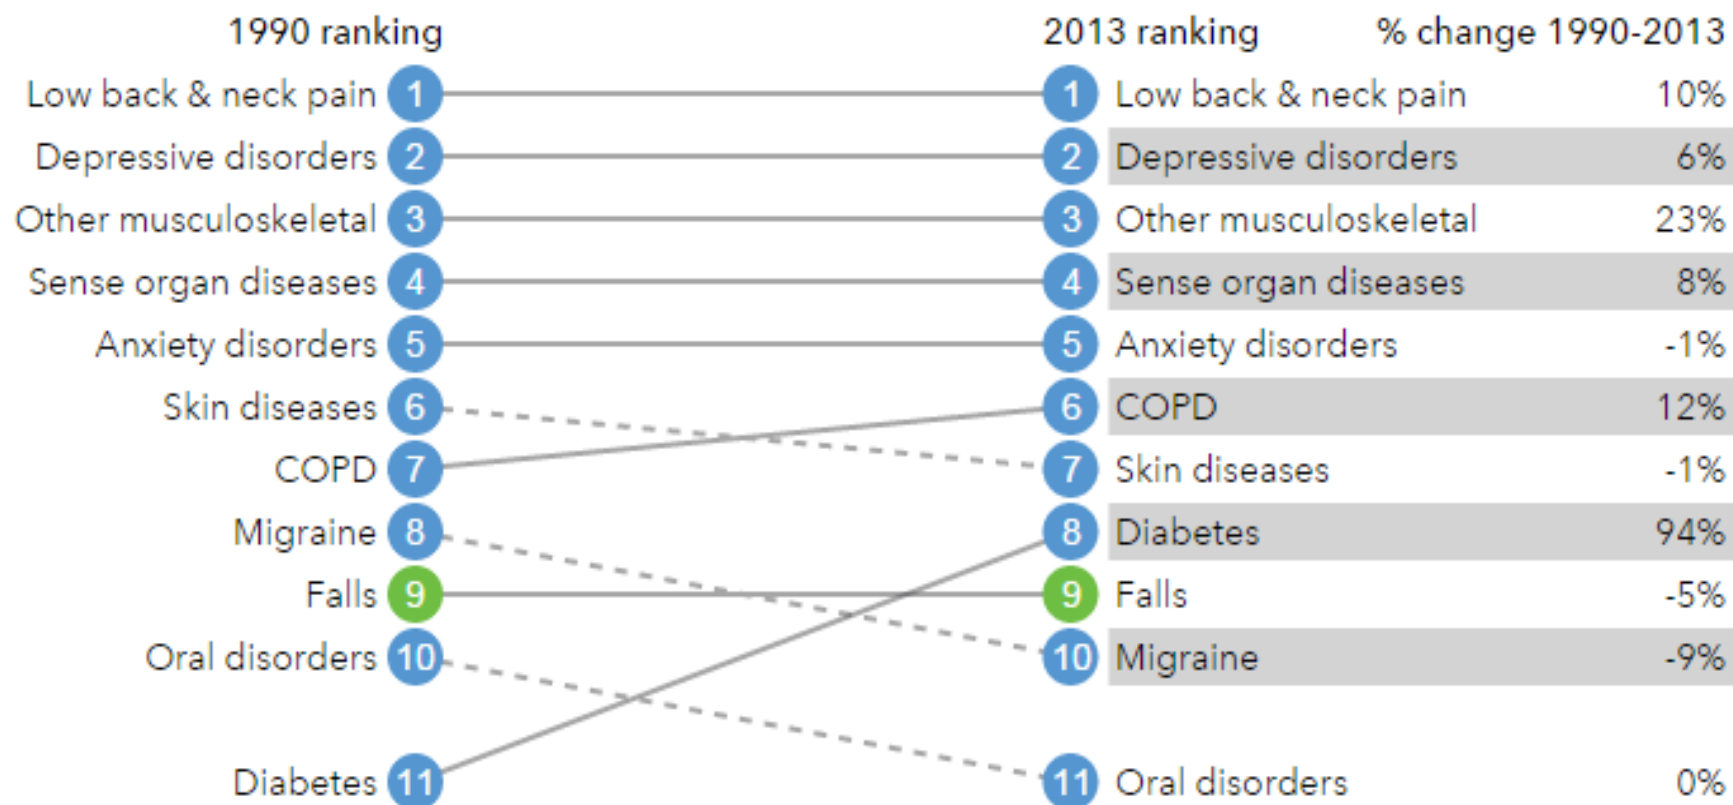

**YLDs** are years lived in less than ideal health. This includes conditions that may last for only a few days, as well as conditions that can last a lifetime.

Rankings are based on YLDs per 100,000, all ages, not age-standardized.

# Teratogenic drugs

- Isotretinoin
- Warfarin
- Ace Inhibitors
- SSRIs (?)
- Anti-seizure
- Antibiotics

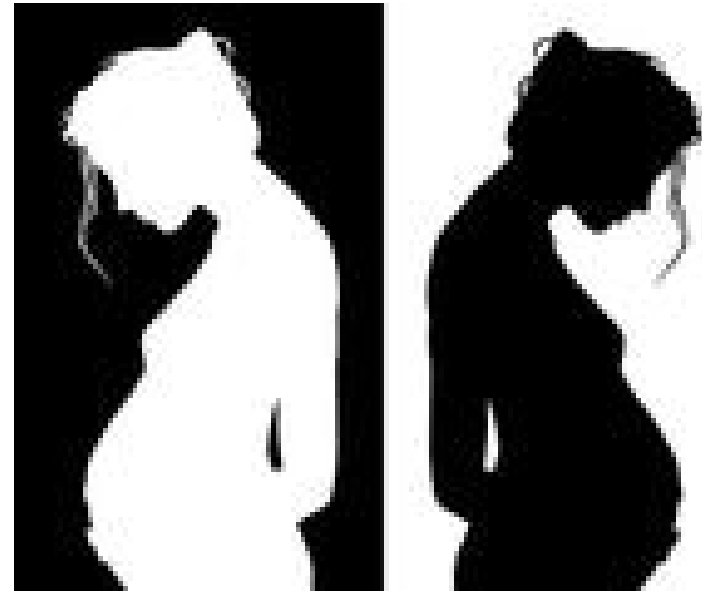

# Drug Development

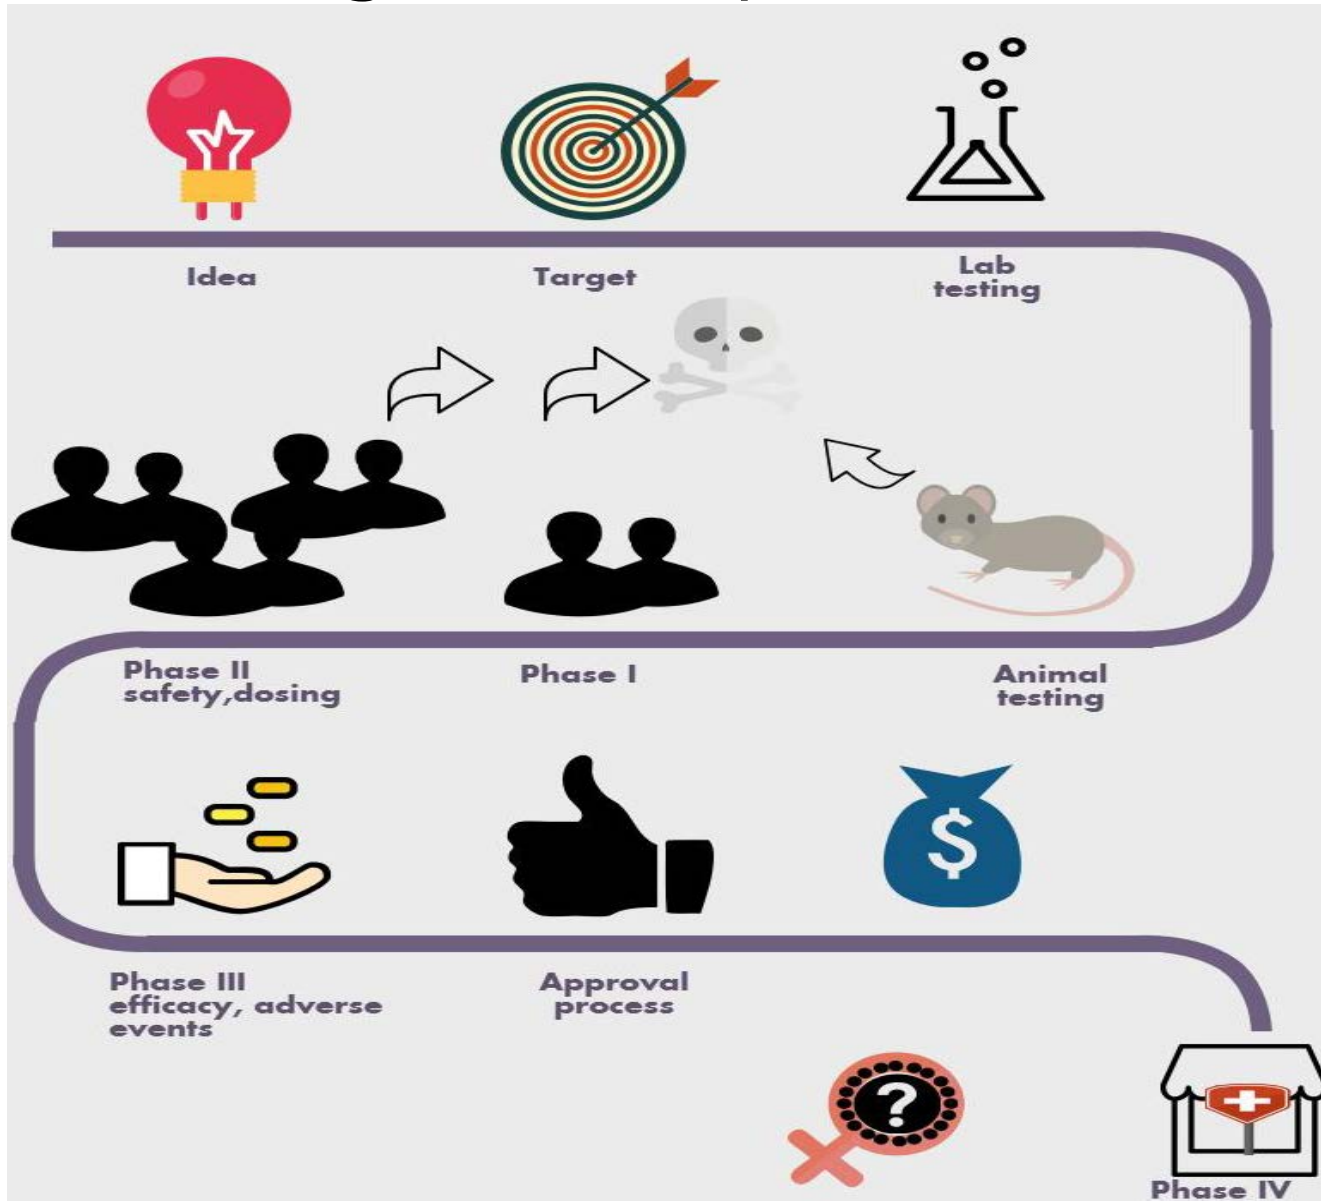



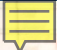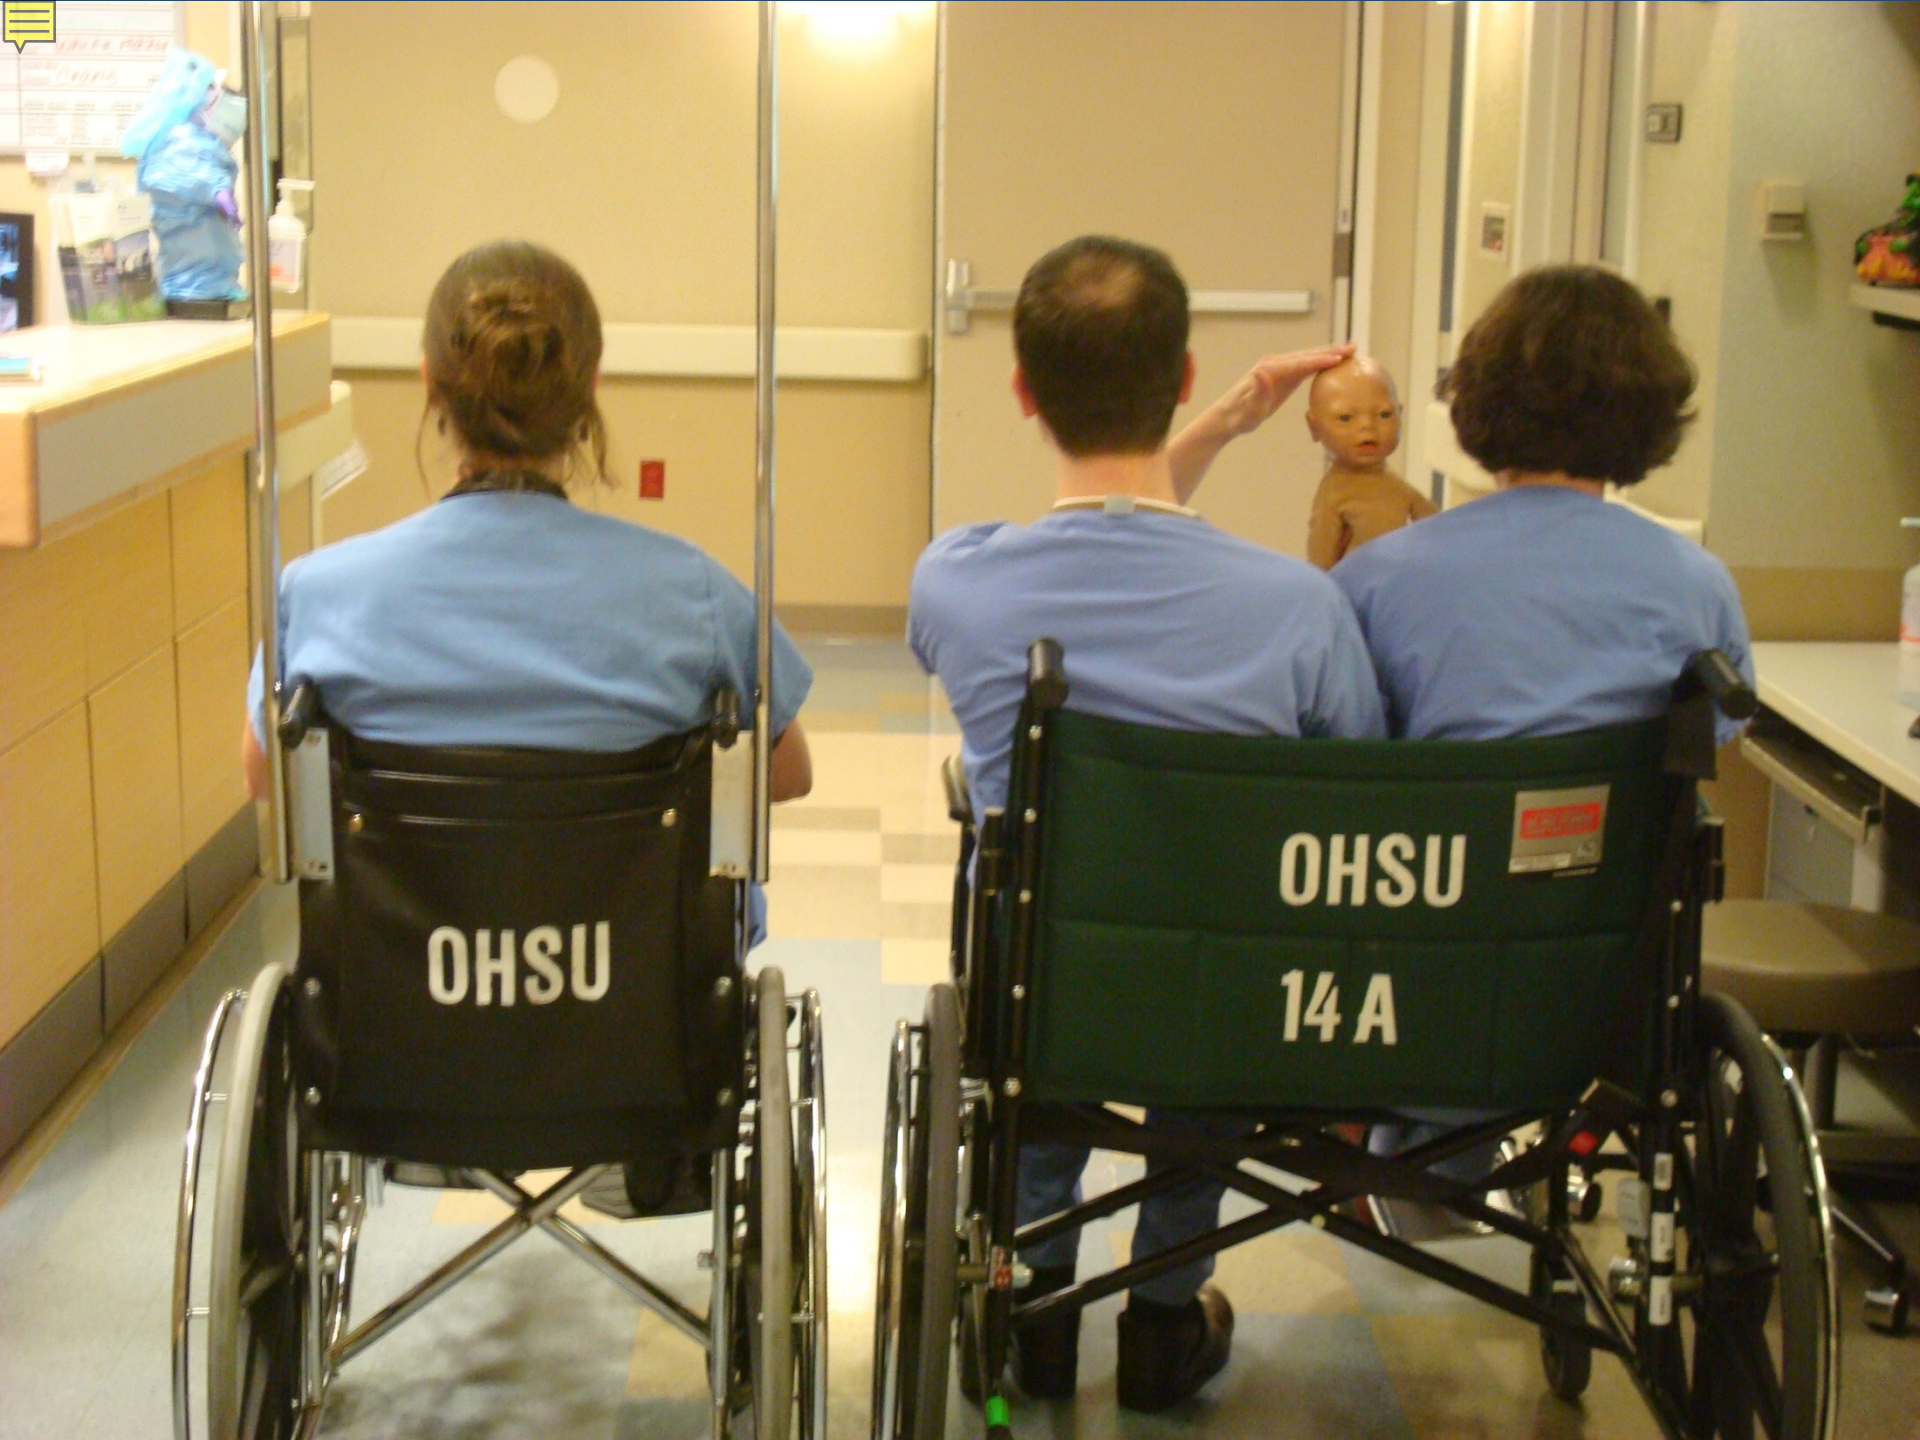

OHSU

OHSU

14 A

# Clinical guidance

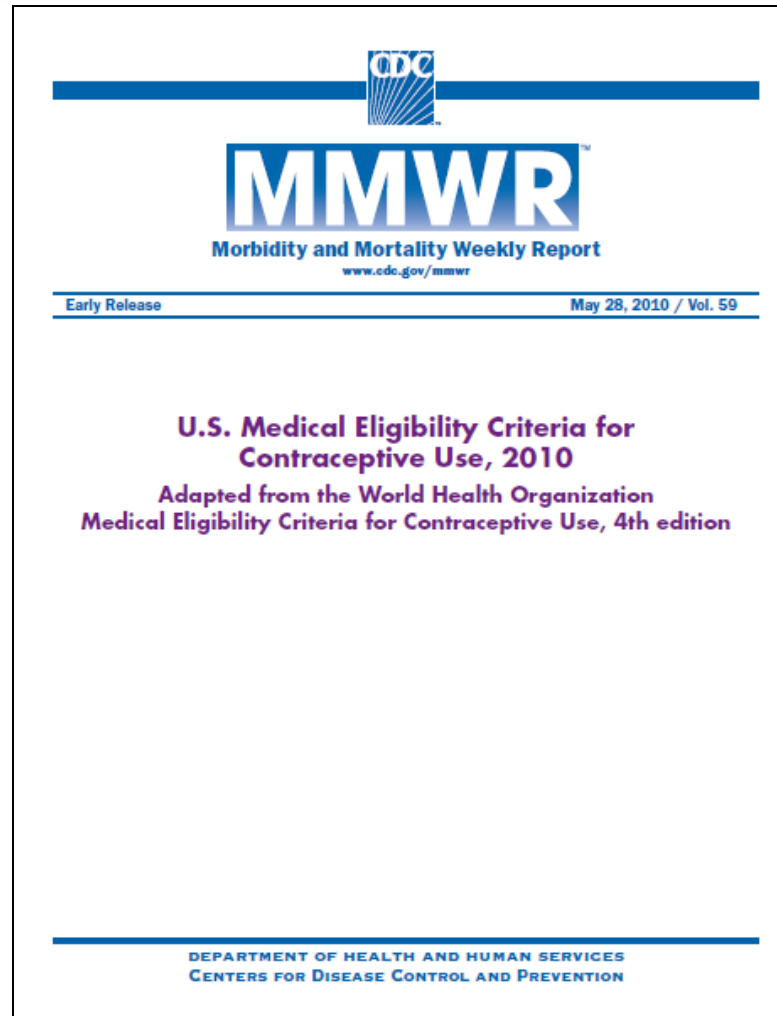

# Contraceptive research at OHSU

## *Bench to Bedside*

- Basic & Translational Research- ONPRC
  - NICHD U54 Contraceptive Development Research Center
    - Established in 2007
  - Oregon Permanent Contraception Research Center (OPERM)
    - Established 2015
    - Gates funded
- Clinical Trials- OHSU
  - NICHD Contraception Clinical Trial Network Research Site
    - Established in 2003
  - Family Planning Fellowship site
    - Established 2001
  - Foundation/Industry-sponsored clinical research

OREGON NATIONAL  
PRIMATE RESEARCH  
CENTER

Division of Reproductive and  
Developmental Sciences

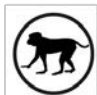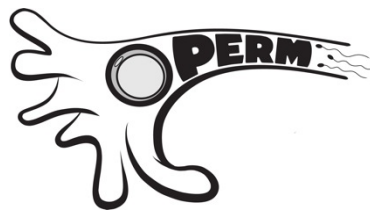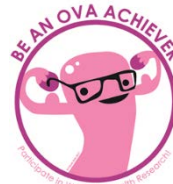

Women's Health Research Unit

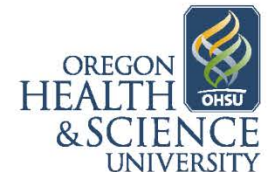





# Summary

- What types of drugs with hormonal components
- When in development
- How should this
- What level and type
- What are the requirements
- How should this package labeling
- How can we foster ongoing contraceptive development?

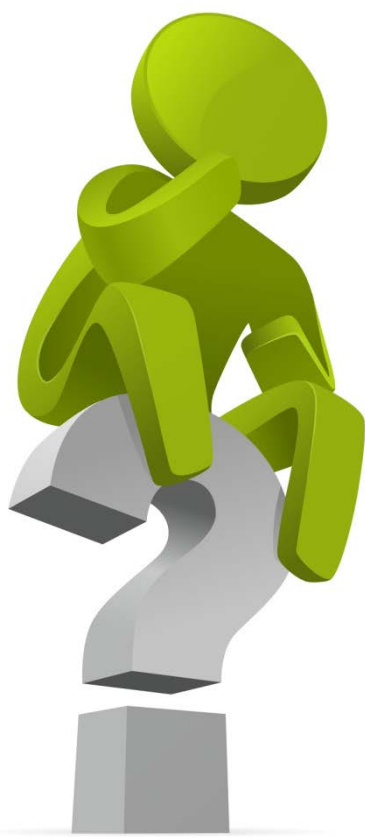

needed for interactions  
What testing occur?  
How should this be tolerated?  
What should be tolerated?  
How should this be translated in the marketplace?

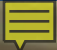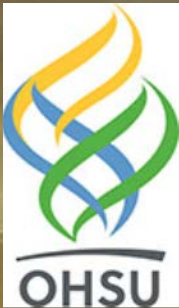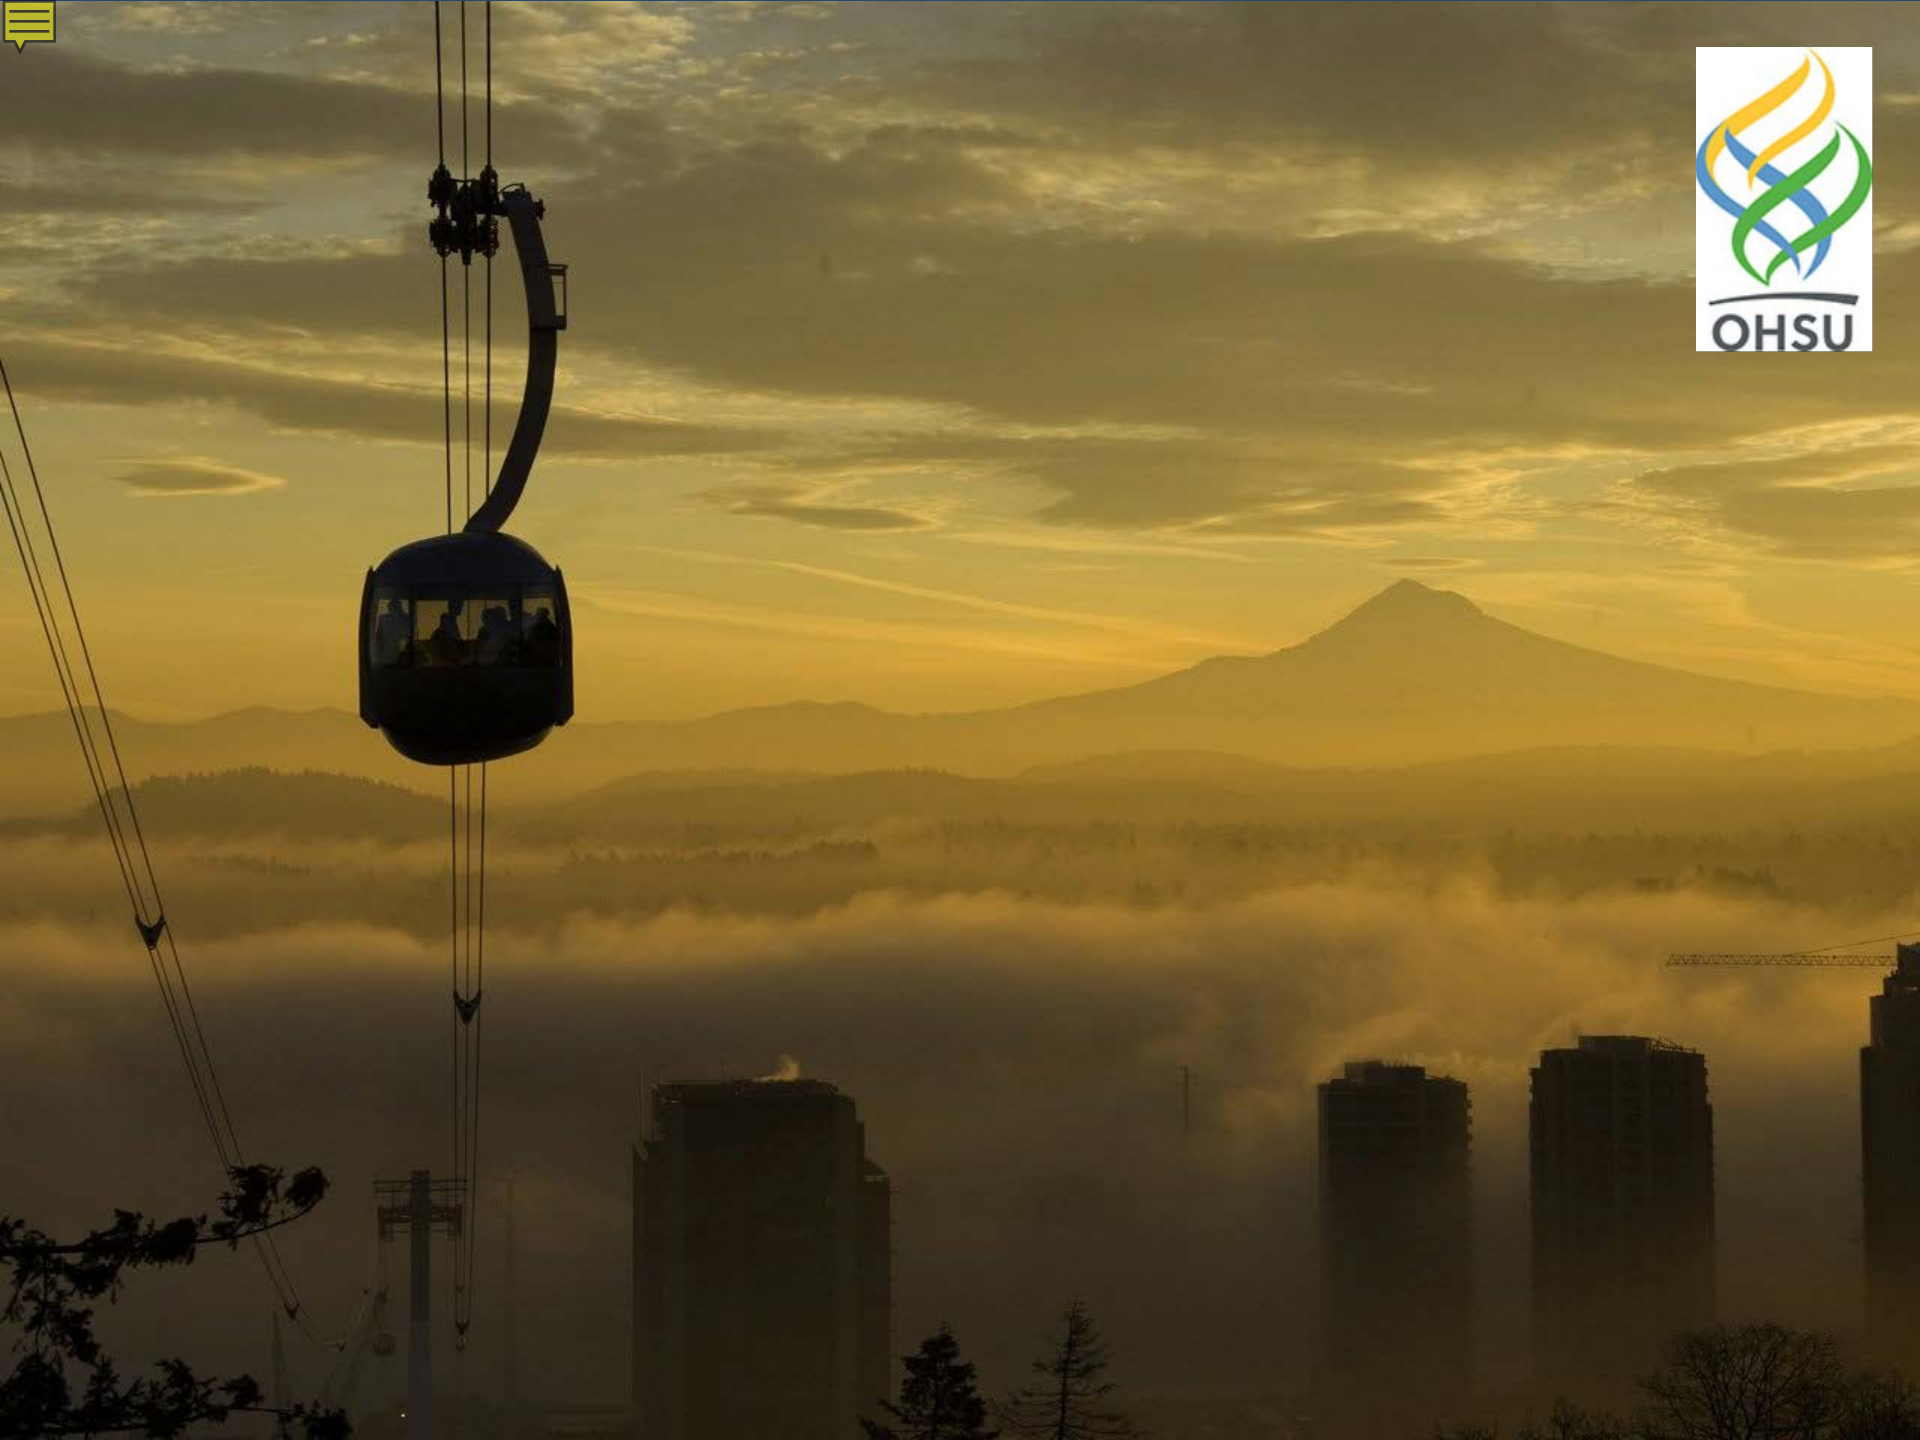

Supplement: NIHMS1009393-supplement-Supplemental_material_1.pdf [file NIHMS1009393-supplement-Supplemental_material_1.pdf]
