# Supplementary material
Source: PubMed Central journal article supplement (PMC11022830)

# Drugs with Teratogenic Potential: Contraception Use and Labeling

Melissa S Tassinari, PhD  
Division of Pediatric and Maternal Health  
OND/CDER/FDA  
November 9, 2015

# Outline

- Defining the drugs with teratogenic potential
- Considerations for Drug-Drug Interaction (DDI) studies
- Labeling

# Teratogen

Any substance, agent, or process that interferes with normal prenatal development, causing the formation of developmental abnormalities of the embryo or fetus

*All substances are poisons; there is none which is not a poison. The right dose differentiates a poison from a remedy*

Paracelsus (1493-1541)

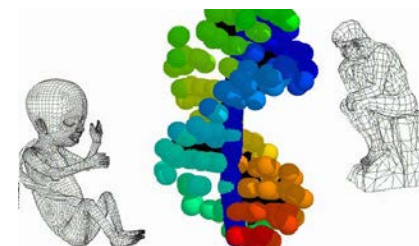

HAZARD Database

# Scientific evidence of teratogenicity

- Non-clinical data
  - Drug, drug class characteristics
  - Impact of maternal disease or condition
  - Human data
  - Biological plausibility of the exposure
- 
- Whether a drug is a teratogen depends on dose, route of administration, frequency and duration of exposure and timing of exposure during pregnancy

# Evaluation of teratogenic risk in drug development

- Nonclinical (animal) toxicology studies
  - Designed to identify hazards, assess potential toxic effects and target organ systems and estimate the safe starting doses for clinical trials
  - Assess hazards that cannot be assessed in clinical trials, namely the potential for carcinogenicity and teratogenicity
- Specifically for the detection of teratogenicity
  - Reproductive and developmental toxicity studies
    - Fertility and Early Embryonic Development (one species)
    - Embryo/Fetal Development (two species)
    - Prenatal and Postnatal Development (one species)

# Conduct of Studies

- Nonclinical Safety Studies for the Conduct of Human Clinical Trials and Marketing Authorization for Pharmaceuticals [ICH M3(R2)]
  - “All female reproduction toxicity studies and the standard battery of genotoxicity studies **should be completed** before inclusion, in any clinical trial, of WOCBP [women of childbearing potential] **not using highly effective birth control** or whose pregnancy status is unknown”

# Data from Nonclinical Studies

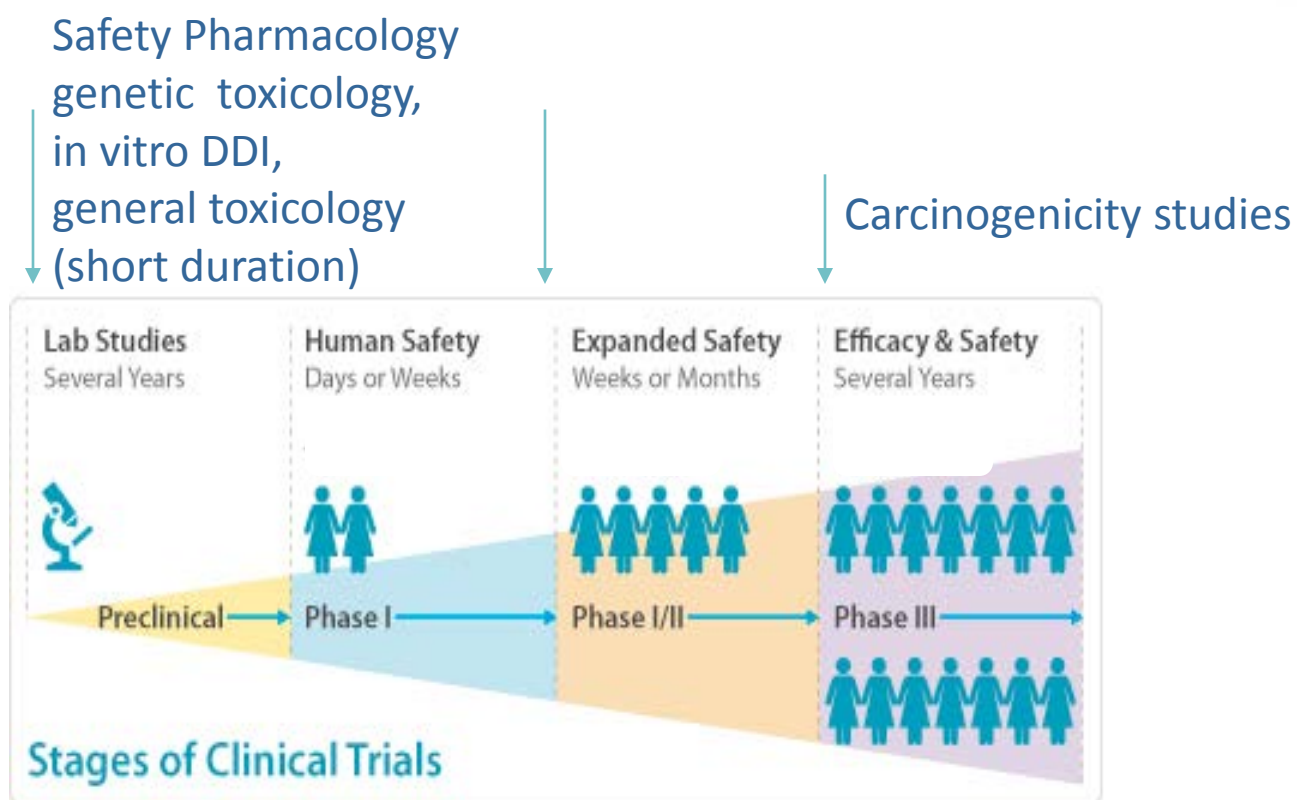

General toxicity studies (increasing duration) Reproductive and developmental toxicity studies

# Managing a drug with a teratogenic risk

- The goal is to prevent or minimize fetal exposure by
  - Use of contraception to prevent pregnancy
  - Use of pregnancy testing to
    - identify and prevent drug exposure prior to giving a drug
    - minimize drug exposure if pregnancy has occurred



# Contraception Use

- Contraception use is an important risk management tool
- For products with teratogenic potential, recommendations for use of effective contraception are included in labeling
- Understanding whether hormonal contraceptive–drug interactions occur is important for making contraception recommendations

# Regulatory Guidelines

- FDA Draft Guidance: Drug Interaction Studies-Study Design, Data Analysis, Implications for Dosing, and Labeling Recommendations 2012

*“The evaluation of CYP enzyme induction should begin with studies of CYP1A2, CYP2B6, AND CYP3A in vitro...*

*It should be noted that there may be mechanisms of induction that are presently unknown. Therefore, a potential human teratogen needs to be studied in vivo for effects on contraceptive steroids if the drug is intended for use in fertile women, regardless of in vitro induction study results.”*

<http://www.fda.gov/downloads/drugs/guidancecomplianceregulatoryinformation/guidances/ucm292362.pdf>

- The same recommendations are found in the EMA Guideline on the investigation of drug interactions 2013

[http://www.ema.europa.eu/docs/en\\_GB/document\\_library/Scientific\\_guideline/2012/07/WC500129606.pdf](http://www.ema.europa.eu/docs/en_GB/document_library/Scientific_guideline/2012/07/WC500129606.pdf)

# Factors in the Decision Process: Contraception Effectiveness

- Contraception effectiveness depends on “the inherent efficacy of the method and on how consistently and correctly it is used”<sup>1</sup>
  - Typical use rate is lower than “perfect use” rate
- Factors that can affect inherent efficacy
  - Weight/ Body Mass Index (BMI)
  - **Drug-drug (contraceptive) interactions**
- Factors that can impact ability to comply with dose regimen
  - Self-administration vs. administered by healthcare provider
  - Need for daily vs. less frequent dosing
  - Psychosocial factors (age, educational level, etc.)
- Factors that can affect ability to tolerate a particular method
  - Bleeding profile or other side effects that may be method-specific

<sup>1</sup>Centers for Disease Control and Prevention, U.S. Selected Practice Recommendations for Contraceptive Use, 2013. MMWR 2013, 62: 1-61.

# Effectiveness of Contraceptive Methods Based on Typical Use

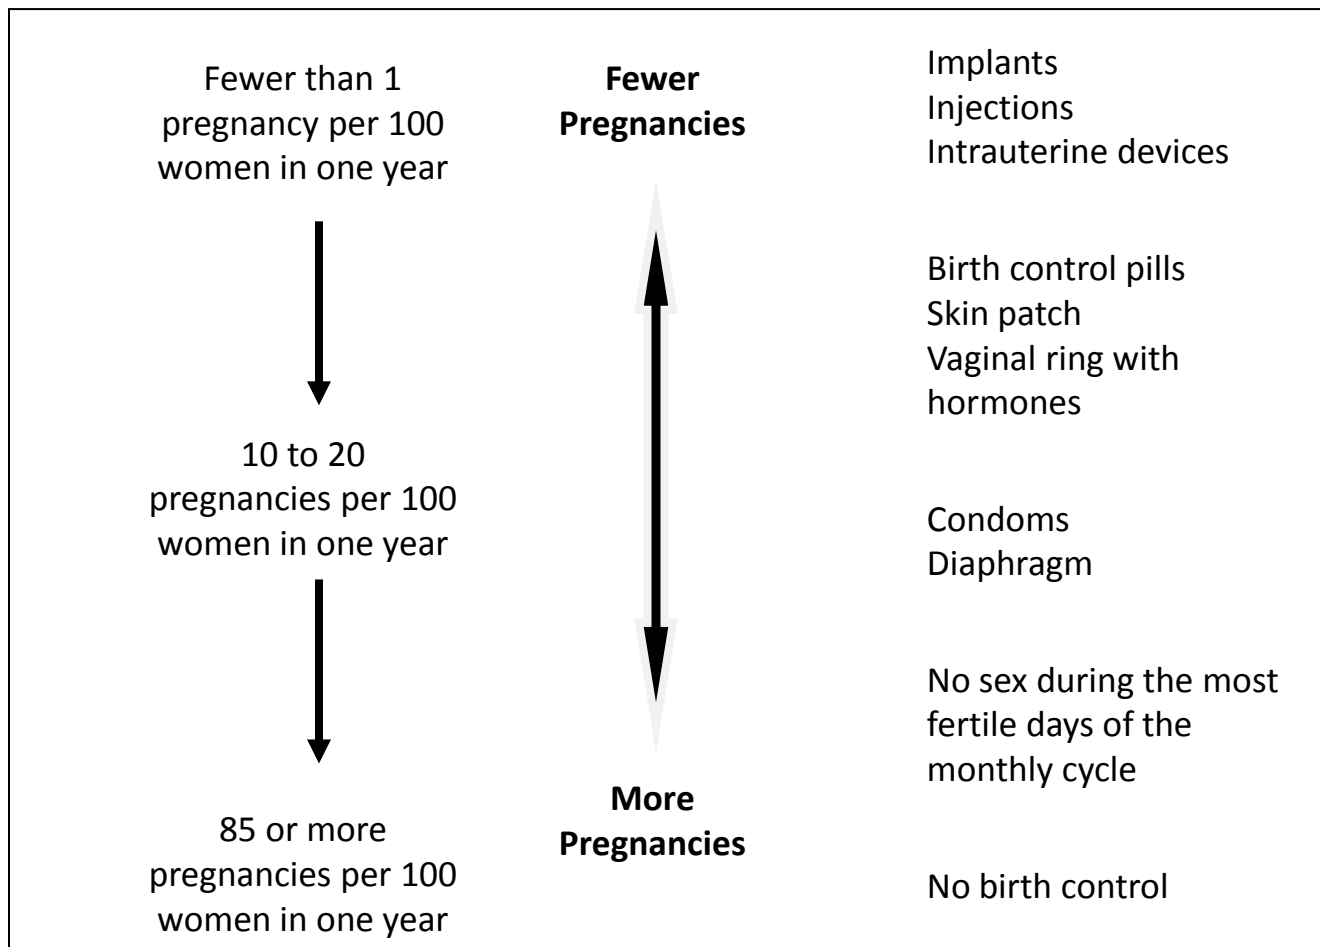

Refer to the approved labeling for each contraceptive method for safety information. The combined use of two comparatively less effective methods does not necessarily equal one method with <1% failure rate. The phrase “no sex during the most fertile days of the monthly cycle” refers to fertility awareness programs.

# Considerations for planning DDI

- What is the expected patient demographic?
  - Critically important when the expected patient population will include Females of Reproductive Potential (FRP)
- Were in vitro drug induction studies positive?
- Were there findings in the genotoxicity studies?
- Is the drug target known to be involved in normal embryonic development?
- Did the embryo fetal development study show adverse fetal effects at exposures that might be obtained in humans?

Plan DDI studies to develop appropriate contraception recommendations

there may be cases when this should be known before large numbers of FRP are exposed in clinical trials (Phase 3)

# Pregnancy and Lactation Labeling Rule (PLLR)

- Took effect on June 30, 2015
- **ALL** prescription drugs are required to remove pregnancy letter categories over the next 3-5 years
- Prescription drugs approved on or after June 30, 2001 must revise content and format of the Pregnancy and Lactation sections of labeling
  - Pregnancy letter categories are replaced with an integrated Risk Summary

# Comparison of Current Labeling with PLLR

Prescription Drug Labeling Sections 8.1 - 8.3 USE IN SPECIFIC POPULATIONS

## CURRENT LABELING

## NEW LABELING

(effective June 30, 2015)

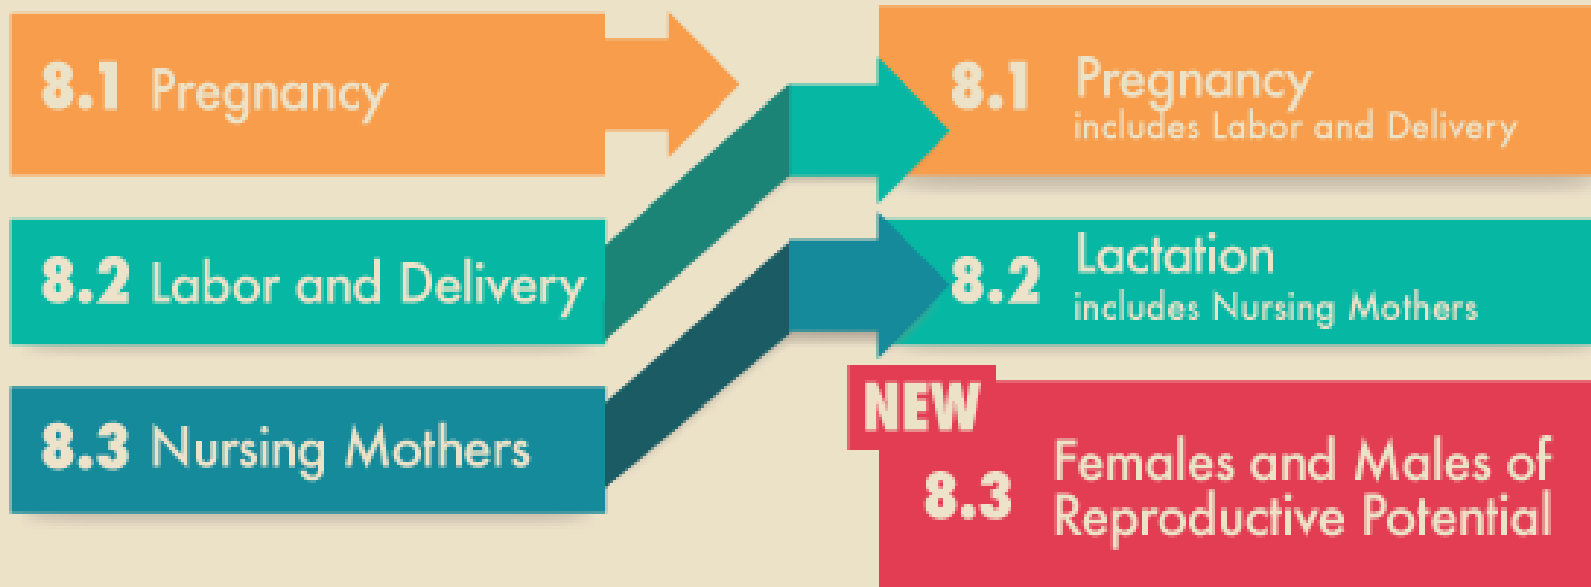

# Intent of PLLR

- Provide the prescriber with relevant information for critical decision-making when treating pregnant or lactating women
- More complete assessment of the known risks based on the available data
- Considerations of medical/disease factors
- Animal data put in context of human exposure
- Human data added when available
- Explicitly states when no data are available



# PLLR – Changes to Labeling

## 8. USE IN SPECIAL POPULATIONS

### 8.1 Pregnancy

Pregnancy Registry

Risk Summary\*

Clinical Considerations

Data

### 8.2 Lactation

Risk Summary\*

Clinical Considerations

Data

### 8.3 Females and Males of Reproductive Potential

Pregnancy Testing

Contraception

Infertility

\*Required heading

See draft guidance: [Pregnancy, Lactation, and Reproductive Potential: Labeling for Human Prescription Drug and Biological Products – Content and Format.](#)

# Contraception Recommendations for Labeling

- Recommendations located in Section 8 - Use in Special Populations
  - Under sub-section *8.3 Females and Males of Reproductive Potential*
  - Cross references to other sections as required (e.g., Contraindications, Warnings & Precautions, Drug Interactions, Clinical Pharmacology)

## 8.3 Females and Males of Reproductive Potential

Based on its mechanism of action, **TRADENAME** may be expected to affect the ability of a pregnant woman to become pregnant.

Pregnancy Testing

Female patients should be advised to use effective contraception during treatment and for at least 2 weeks after the last dose of **TRADENAME**.

Contraception

*Females:* Advise female patients that **TRADENAME** can reduce the effectiveness of oral contraceptives and to use alternative effective contraception during treatment with **TRADENAME** [see *Warnings and Precautions (5.x)*, *Drug Interactions (7.x)*, *Clinical Pharmacology (12.x)*].

*Precautions (5.x),*

Infertility

### Contraception

*Females:*

Advise female patients of reproductive potential to use effective contraception during treatment and for at least 2 weeks after the last dose of **TRADENAME**.

Advise patients that **TRADENAME** can reduce the effectiveness of oral contraceptives and to use alternative effective contraception during treatment with **TRADENAME** [see *Warnings and Precautions (5.x)*, *Drug Interactions (7.x)*, *Clinical Pharmacology (12.x)*].

*Females:* Decreased fertility and ovarian toxicity were observed in female rats treated with **DRUGNAME**. Advise female patients of reproductive potential ...

*Males:* Effects on spermatogenesis have been observed in animals treated with **DRUGNAME**. Advise male patients of the potential risk...

# Summary

- Nonclinical studies (reproductive and developmental toxicity studies) conducted in the course of drug development provide the data to estimate teratogenic potential.
- Clinical DDI studies for hormonal contraceptives should be conducted for drugs with known or suspected teratogenic potential
- Recommendations for contraceptive methods in large scale clinical trials and subsequently, for the approved product labeling should be informed from outcomes from hormonal contraceptive DDI studies
- When contraception recommendations are included in labeling, they are located in subsection 8.3 Females and Males of Reproductive Potential
  - Include impact on hormonal contraceptives when appropriate

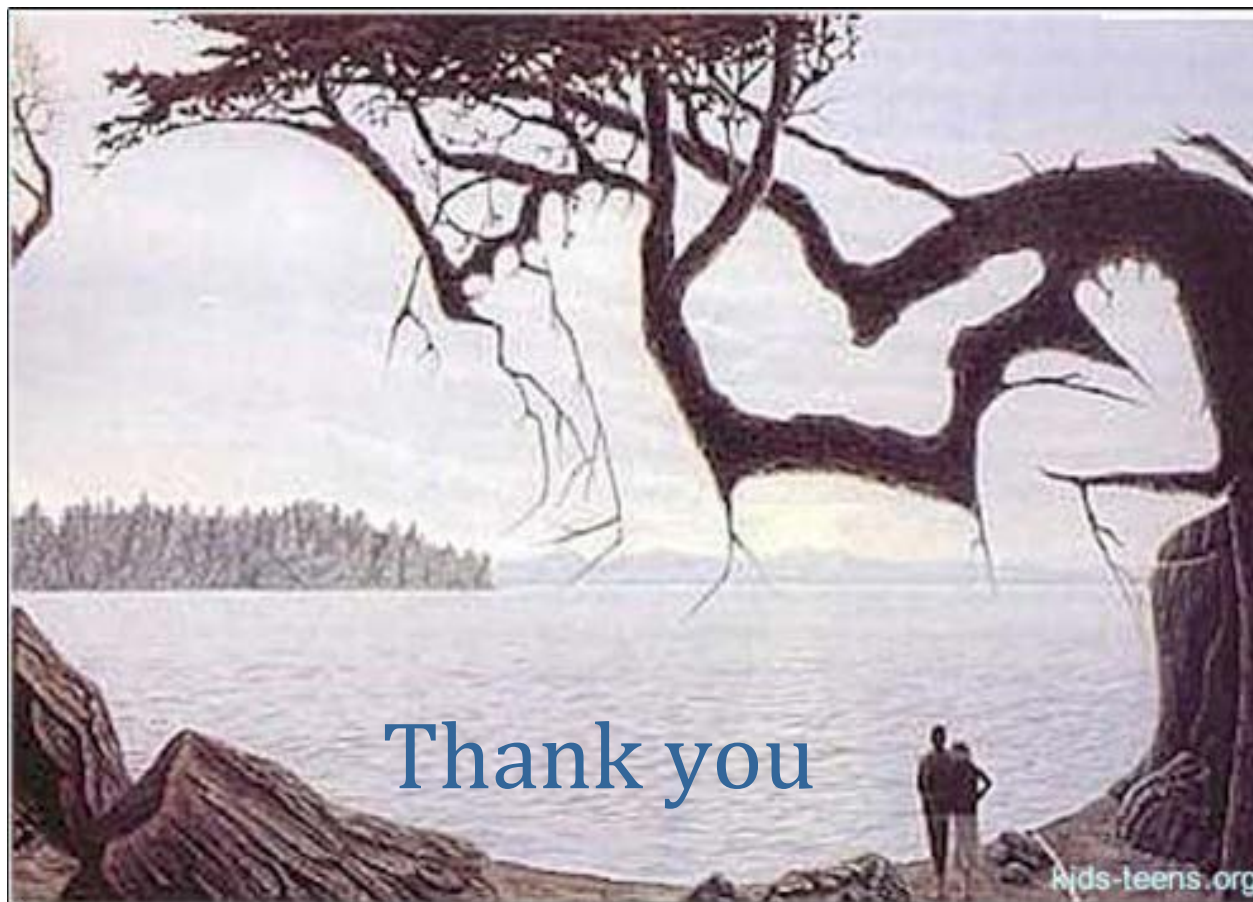

Supplement: NIHMS1009393-supplement-Supplemental_material_7.pdf [file NIHMS1009393-supplement-Supplemental_material_7.pdf]
