# Supplementary material
Source: PubMed Central journal article supplement (PMC11022830)

# Drug Interaction Recommendations in the USMEC: Incorporating science into clinical recommendations

**Erin Berry-Bibee, MD MPH**

Guest researcher

Division of Reproductive Health/CDC

Assistant Professor

Department of OB/GYN UNC Chapel Hill

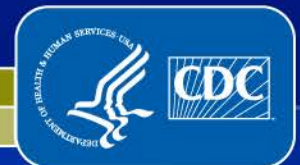

## Process

1. Identify area of scientific or clinical concern
2. Conduct systematic review
3. Present evidence to panel of family planning experts and stakeholders
4. Discuss data and generate clinical recommendations

# 1. Identify area of scientific or clinical concern

## □ CIRE system

- *ContinuousIdentification of Research Evidence*
- Helps identify new data as it is published

## □ Public and Provider inquiry

- Helps us meet clinical needs of providers
- Identifies new areas of clinical concern that might not be identified through CIRE system

## 2. Conduct systematic review

- ❑ PRIMSA guidelines for systematic reviews
- ❑ Inclusion criteria for most drug interaction reviews
  - Published peer-reviewed articles in any language from any year
  - Any methodology
  - Outcomes
    - Clinical- Effectiveness and adverse events related to both test drug and contraceptive (e.g. pregnancies, ovulation data, breakthrough bleeding)
    - Pharmacokinetic (PK)- include any
- ❑ Quality
  - Clinical- USPSTF system
  - PK- either did not grade or generated our own grading system

# Quality rating system for PK studies developed for the systemic review of psychotropic drugs and St. John's wort \*

## □ Three Overall Quality Categories:

- *Good*- No important limitations, meets all criteria.
- *Fair*- Clear limitations to study design but no fatal flaws.
- *Poor*- One or more fatal flaws that likely invalidate results.

## □ 9-items

- Design
- Sample size
- Population
- Exposure
- Outcome(s)
- Timing
- Intersubject variability
- Steady state
- Assay and Analysis Validation

\*Developed in collaboration with MJ Kim (FDA)

## 2. Conduct systematic review

- ❑ **What to do with other sources of information?**
  - FDA label
  - Non-peer-reviewed/unpublished results
  
- ❑ **Not a part of results of the systematic review**
  - No systematic way of searching for this kind of data
  - May be able to contribute to discussion points

### 3. Present evidence to panel of family planning experts and stakeholders

- ❑ Systematic review provided prior to panel meeting
- ❑ Data presented to panel
- ❑ Pertinent labeling information presented to panel

### 3. Present evidence to panel of family planning experts and stakeholders

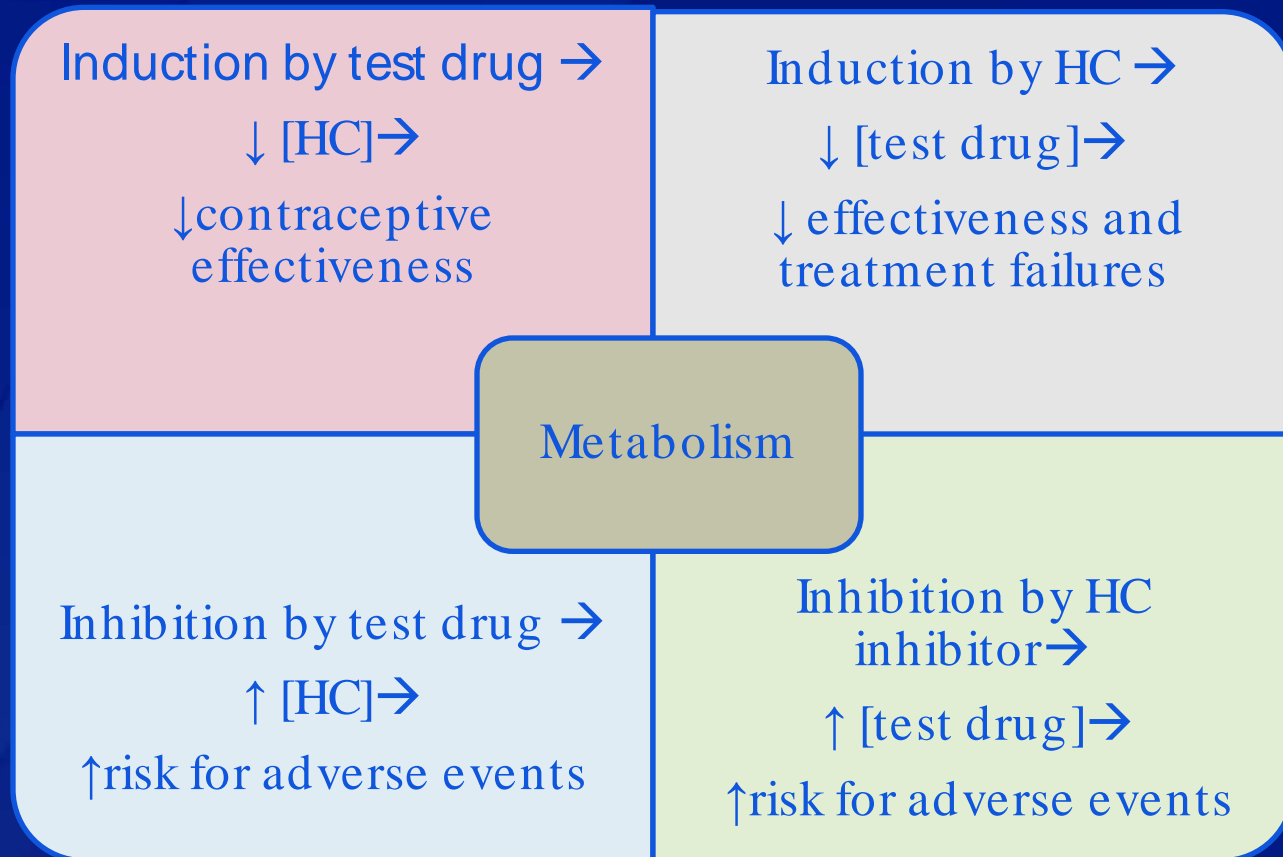



| Psychotropic drug       | HC outcomes |           | Psychotropic outcomes |                  |
|-------------------------|-------------|-----------|-----------------------|------------------|
|                         | Clinical    | PK        | Clinical              | PK               |
| SSRIs                   | ↔<br>fair   | ↔<br>good | ↔<br>fair             | ↑/?<br>poor      |
| TCA's                   |             |           | ↔<br>poor             | ↔/↑<br>fair/poor |
| Bupropion               |             |           |                       | ↓/↔<br>good      |
| Atypical Antipsychotics |             | ↔<br>good |                       | ↔<br>fair        |
| Oral Benzodiazapines    |             |           | ↔<br>fair             | ↔/↓<br>fair/poor |
| MAOIs                   |             |           |                       |                  |
| Mirtazapine             |             |           |                       |                  |
| Trazadone               |             |           |                       |                  |
| Buspirone               |             |           |                       |                  |
| Hydroxyzine             |             |           |                       |                  |

## 4. Discuss data and generate clinical recommendations

### □ Guiding principles include

- When a “condition” may have impact on contraceptive effectiveness then efficacy is weighted along with safety in making the recommendations
  - Drug-drug interactions (DDIs)
  - Obesity
  - Medical condition which affects metabolism (e.g. liver disorders, CF)
- Evidence driven decision making
- For each condition/drug a recommendation is made for all contraceptive methods (even if data is only for COCs)

# Challenges

- ❑ **Lack of clinical outcomes**
  - Contraceptive failure rates/pregnancy data
  - Adverse events associated with HC
  - Adverse events associated with the test drug
  
- ❑ **What pharmacodynamic outcomes are helpful to consider?**
  
- ❑ **How do we translate PK data into clinical recommendations that accurately reflect theoretical or proven concerns?**
  - Which PK parameters are “best” or “required” to look at?
  - Is there a threshold of change that should raise *clinical* concern
  - What to do with use of multiple drugs (ARVs in particular)

## PK parameter rule(s)?

| Contraceptive         | Most important PK parameters    | Acceptable/notable PK parameters |
|-----------------------|---------------------------------|----------------------------------|
| COC                   | AUC and $C_{max}$               | ?                                |
| Patch                 | ?? AUC and $C_{max}$            | ?                                |
| Combined Vaginal Ring | ?? AUC and $C_{max}$            | ?                                |
| DMPA                  | $C_{min}$ , $C_{coverage}$ =AUC | ?                                |
| Implant               | $C_{min}$ , $C_{coverage}$ =AUC | ?                                |
| LNG-IUD               | $C_{min}$ , $C_{coverage}$ =AUC | ?                                |

# Challenges

## □ Limited data on

- Drug interactions among obese women
- Can we extrapolate across different progestin types
  - CHC studies with different progestins?
  - Across various POCs?
- Non-oral formulations (e.g. vaginal ring, patch, injectable)
  - What is the role of the 1<sup>st</sup> pass effect?
  - What other difference in absorption/metabolism across the non-oral formulations might effect potential DDIs?
- Efficacy → progestin; Adverse events → estrogen ???

# Challenges

## □ Limited data on

- Progestin only contraceptives
  - Injectable → high dose, different progestin.
  - Implant → concern with ARVs, limited data on other potential DDIs
- LNG-IUD → are we ever concerned about DDIs?
  - Systemic LNG is present
    - What role does systemic LNG play in contraceptive efficacy?
    - Can systemic LNG act as a perpetrator drug? Victim drug?

## Challenges

- ❑ Is there a way to access unpublished industry data for drug interaction studies in a systematic way?
- ❑ How do we assess the quality of PK studies?

For more information please contact Centers for Disease Control and Prevention

1600 Clifton Road NE, Atlanta, GA 30333

Telephone: 1-800-CDC-INFO (232-4636)/TTY: 1-888-232-6348

E-mail: [cdcinfo@cdc.gov](mailto:cdcinfo@cdc.gov) Web: <http://www.cdc.gov>

The findings and conclusions in this report are those of the authors and do not necessarily represent the official position of the Centers for Disease Control and Prevention.

National Center for Chronic Disease Prevention and Health Promotion

Division of Reproductive Health

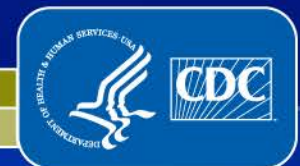

Supplement: NIHMS1009393-supplement-Supplemental_material_10.pdf [file NIHMS1009393-supplement-Supplemental_material_10.pdf]
