# Supplementary material
Source: PubMed Central journal article supplement (PMC11022830)
Supplement: NIHMS1009393-supplement-Supplemental_material_2.pdf [file NIHMS1009393-supplement-Supplemental_material_2.pdf]

# Drug Interactions with Hormonal Contraceptives: Regulatory Perspective

**Chongwoo Yu, Ph.D.**

Office of Clinical Pharmacology – DCP3

Office of Translational Sciences

Center of Drug Evaluation and Research (CDER)

U.S. Food and Drug Administration

(Email: [chongwoo.yu@fda.hhs.gov](mailto:chongwoo.yu@fda.hhs.gov))

FDA Public Meeting on Drug Interactions with Hormonal Contraceptives  
November 9, 2015

# Disclaimer

- I have no conflicts of interest
- The opinions expressed in this presentation are mine and do not necessarily reflect the official views of the U.S. Food and Drug Administration (FDA)

# Key Questions

- What should be used as the hormonal contraceptive (HC) drug-drug interaction (DDI) study endpoint, pharmacokinetics (PK) only or PK and pharmacodynamics (PD)? Why?
- Can we extrapolate a DDI study result from one progestin/estrogen to another? If so, under what circumstances?
- How do we define clinically meaningful DDIs based on PK or PK and PD assessments? How can we develop tangible and clear labeling recommendations?

# Overview

- Introduction
- PK based DDI assessment and interpretation
- Approaches in PD based DDI assessment
- Data extrapolation
- Conclusion

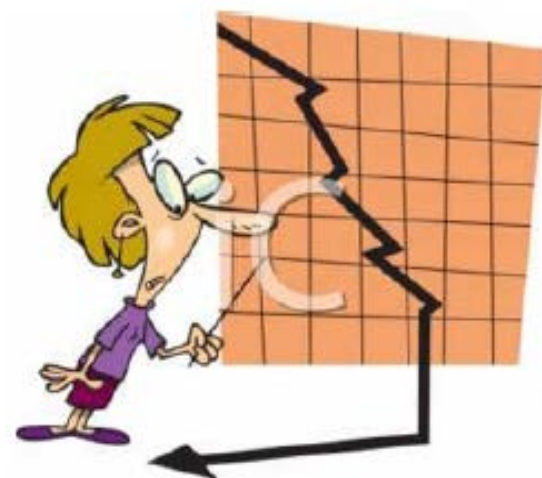

# Drug Interactions

## Directions

- HC as a victim: Other drugs' effect on HC's PK, PD
- HC as a perpetrator: HC's effect on other drugs' PK, PD

## Potential Concerns (HC as a victim)

- Induction: Exposure ↓ - Efficacy
- Inhibition: Exposure ↑ - Safety

## Approaches

- Pharmacokinetics: AUC,  $C_{\max}$
- Pharmacodynamics: Progesterone, LH, FSH

# Typical COC DDI Study Design

## Single Dose Study (PK only)

|                    |                     |                          |                                   |
|--------------------|---------------------|--------------------------|-----------------------------------|
| Day 1<br>COC<br>PK | Day 2-14<br>Washout | Day 15-29<br>Perpetrator | Day 30<br>Perpetrator + COC<br>PK |
|--------------------|---------------------|--------------------------|-----------------------------------|

In this case, perpetrator's steady state is reached by Day 29.

## Multiple Dose Study: Lead-in + 2 cycles (PK + PD)

| Cycle 1 (Lead-in) |        |        |                     | Cycle 2 (Treatment A)     |        |        |                     | Cycle 3 (Treatment B)                 |        |        |                     |
|-------------------|--------|--------|---------------------|---------------------------|--------|--------|---------------------|---------------------------------------|--------|--------|---------------------|
| Week 1            | Week 2 | Week 3 | Week 4<br>Pill free | Week 1                    | Week 2 | Week 3 | Week 4<br>Pill free | Week 1                                | Week 2 | Week 3 | Week 4<br>Pill free |
| COC only          |        |        |                     | COC only<br><br>↑ PD ↑ PK |        |        |                     | COC +<br>Perpetrator<br><br>↑ PD ↑ PK |        |        |                     |

Sampling day for PD measurements will vary depending on analyte(s).

PK and PD measurements should be on the same day of each cycle for a cross-cycle comparison.

# PK-based HC DDI Assessments

# PK Assessment

- In general, PK parameters are used as the primary endpoint in HC DDI studies
- If  $C_{\max}$  and AUC are within BE limits (90% CI: 80.00-125.00%), clinically meaningful DDIs are not expected



Case Example:

## **Interpreting PK-based HC DDI Study Results Outside of the BE Limits**

# PK DDI Interpretation Outside of BE Limits (1)

## Rifampin DDI Study

- DNG/EV: 28-day, 4-phasic sequential COC containing dienogest (DNG) and estradiol valerate (EV)
- DNG: CYP3A4 substrate
- DDI study design with rifampin, a strong CYP3A4 inducer:
  - Days 1-11: DNG 3 mg/EV 2 mg
  - Days 12-16: DNG 3 mg/EV 2 mg + rifampin 600 mg QD

# PK DDI Interpretation Outside of BE Limits (2)

- Study results:
  - DNG mean AUC: 83% ↓ = exposure of ~0.51 mg DNG
  - Estradiol (E2) mean AUC: 44% ↓ = exposure of ~1.1 mg E2
  - Mean  $C_{max}$  decreased: DNG (52%) and E2 (25%)
- Other information for consideration:
  - DNG: dose linear
  - Minimal dose for efficacy: 2 mg EV and 2-3 mg DNG for effective ovulation inhibition and sufficient cycle control
  - Note: We don't get this information unless the COC is an NME

# DNG/EV Product Label

## HIGHLIGHTS

### Warning and Precautions

CYP3A4 induction: Women taking strong CYP3A4 inducers (for example, carbamazepine, phenytoin, rifampicin, and St. John's wort) **should not choose DNG/EV as their oral contraceptive** due to possibility of decreased contraceptive efficacy.

# Exploring PD-based Assessment as a Supportive Approach to PK-based Assessment

# PD Assessment (1)

- 33% of studies (1997-2013) conducted PD assessment in addition to PK
- Progesterone, LH, and FSH Profiles: Pre-treatment vs. COC Cycles

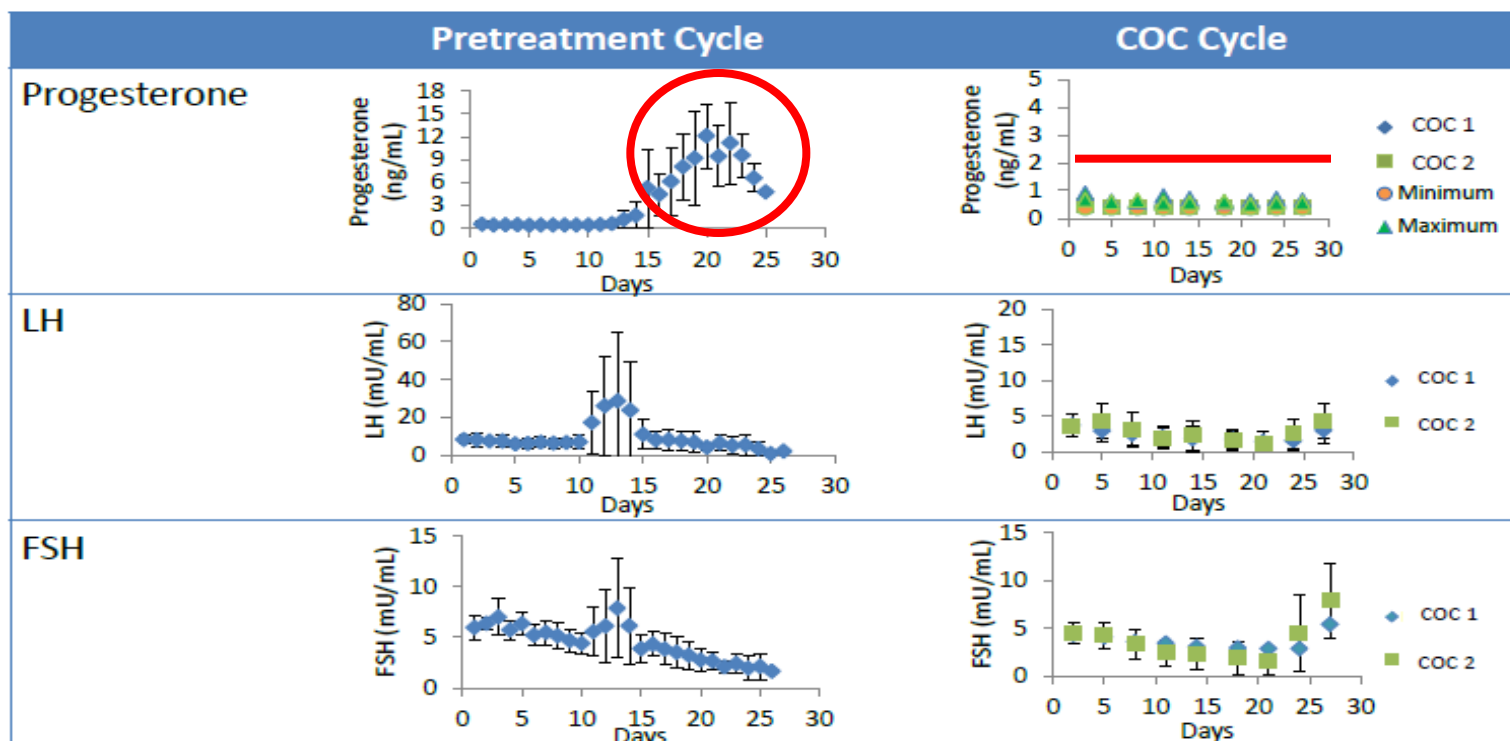

- Progesterone may be a useful PD marker to determine the clinical relevance of DDI regarding efficacy, as it stays elevated for several days

# PD Assessment (2)

Mean (SD) Progesterone concentrations in females with ovulation from Phase 2 ovulation studies or dose-finding studies

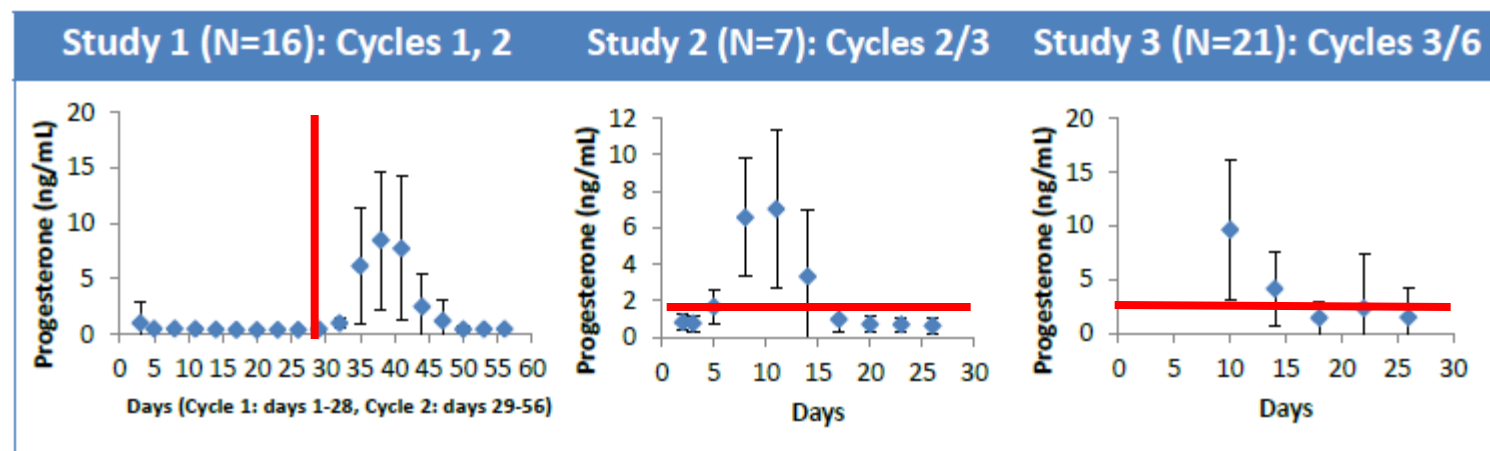

- Trend of progesterone surge with delayed ovulation was observed early in the next COC cycle in 3 clinical studies investigated
- Progesterone > 2 ng/mL with COCs might indicate ovulation
- Use of serum progesterone concentrations may be useful as a supportive PD indicator of DDI in addition to PK data

Case Examples:

## **Challenges in Data Extrapolation Between HCs**



# Case Examples

- Study 1: Boceprevir effect on **norethidrone (NET)**/ethinyl estradiol (EE)
  - NET 1 mg/EE 35 mcg (C 1-2) ± boceprevir 800 mg TID (C 3) (N=20)
- Study 2: **Boceprevir** effect on **drospirenone (DRSP)**/EE
  - DRSP 3 mg/EE 20 mcg (7 d) ± boceprevir 800 mg TID (7 d) (N=16)
- Study 3: **Ketoconazole (KTZ)** effect on DRSP/EE
  - DRSP 3 mg/EE 20 mcg (28 d) ± KTZ 200 mg BID (10 d) (N=22)
- Study 1 vs. 2: Same perpetrator on **different HC (progestin)**
- Study 2 vs. 3: **Different perpetrator** on same HC

# Study 1 vs. Study 2: Boceprevir on NET/EE vs. DRSP/EE

PK results:

| Study            | Analyte | AUC<br>GMR | AUC<br>90% CI | C <sub>max</sub><br>GMR | C <sub>max</sub><br>90% CI |
|------------------|---------|------------|---------------|-------------------------|----------------------------|
| Study 1<br>(BOC) | NET     | 0.96       | 0.87-1.06     | 0.83                    | 0.76-0.90                  |
|                  | EE      | 0.74       | 0.68-0.80     | 0.79                    | 0.75-0.84                  |
| Study 2<br>(BOC) | DRSP    | 1.99       | 1.87-2.11     | 1.57                    | 1.46-1.70                  |
|                  | EE      | 0.76       | 0.73-0.79     | 1.00                    | 0.91-1.10                  |

- No effect on NET but 99% ↑ on DRSP exposure
- EE exposure increase expected BUT 24-26% ↓ in AUC observed in both studies: The nature of boceprevir's effect on EE metabolism is not understood

# Study 1: Boceprevir on NET/EE

PD results:

| Parameter    | GMR          | 90% CI    |
|--------------|--------------|-----------|
| LH           | 0.73-0.88    | 0.43-1.50 |
| FSH          | 1.13-1.25    | 0.83-1.71 |
| Progesterone | Not reported |           |

Limitations of PD results in this study:

- Conflicting PD outcome: FSH  $\uparrow$  vs. LH  $\downarrow$
- Wide 90% CI: not powered adequately
- Absence of progesterone data
- Inconclusive PD results  $\rightarrow$  example of challenge in PD utilization

# Study 2 vs. Study 3: Boceprevir vs. KTZ on DRSP/EE

PK results:

|                  | Analyte | AUC<br>GMR | AUC<br>90% CI | C <sub>max</sub><br>GMR | C <sub>max</sub><br>90% CI |
|------------------|---------|------------|---------------|-------------------------|----------------------------|
| Study 2<br>(BOC) | DRSP    | 1.99       | 1.87-2.11     | 1.57                    | 1.46-1.70                  |
|                  | EE      | 0.76       | 0.73-0.79     | 1.00                    | 0.91-1.10                  |
| Study 3<br>(KTZ) | DRSP    | 2.68       | 2.44-2.95     | 1.97                    | 1.79-2.17                  |
|                  | EE      | 1.40       | 1.31-1.49     | 1.39                    | 1.28-1.52                  |

- Increase in DRSP AUC observed in both studies: DRSP is a CYP3A4 substrate
- Both studies used same COC regimen → EE exposure increased (40%) in Study 3 as expected but decreased (24%) in Study 2

# Data Extrapolation

## Things to consider from the 3 COC DDI studies

- **Same perpetrator regimen** (boceprevir 800 mg TID), **Different progestins** (NET vs. DRSP), Same estrogen (EE) → **Different study outcome!**
  - NET: ↔ DRSP: 100% ↑
  - EE: 24-26% ↓
- **Different perpetrators** (strong CYP3A4 inhibitors: boceprevir 800 mg TID vs. KTZ 200 mg BID) on **same COC regimen** (DRSP 3 mg/EE 0.02 mg QD) → **Different study outcome!**
  - EE: 24% ↓ with boceprevir; 40% ↑ with ketoconazole
  - DRSP: 100-170% ↑ → shows that DRSP is a CYP3A4 substrate
- **Presents challenge in extrapolating DDI predictions from one to another COC** due to potentially different metabolic pathways, mechanism of interaction, or extent of the contribution from enzymes

# Conclusions

- In general, PK parameters are used as the primary endpoint in HC DDI studies but often presents challenges in data interpretation for clinically meaningful DDIs
- Use of serum progesterone concentrations may be useful as a supportive PD indicator of DDI in addition to PK data with a caveat of potentially large variability, inconclusive or conflicting data and a need of large sample size
- There are challenges in extrapolating DDI predictions from one to another COC due to potentially different metabolic pathways, mechanism of interaction, or extent of the contribution from enzymes

# Acknowledgements

- FDA OWH Intramural Research Team
  - Myong-Jin Kim, Li, Li, Shiew-Mei Huang, Lei Zhang, Ping Zhao, Daniel Davis, Lisa Soule, Gerald Willett
  - Na Hyung Kim, Nan Zhang
- Special Thanks to:
  - LaiMing Lee, Jihong Shon
  - Su-Young Choi, Sang Aeh Park, Mee Ryung Ahn, Kumpal Madrasi
- FDA OCP Colleagues:
  - OCP Management: Issam Zineh, Shiew-Mei Huang
  - DCP3 Management: Dennis Bashaw, Hae Young Ahn
- Panel Members
