# Supplementary material
Source: PubMed Central journal article supplement (PMC11022830)
Supplement: NIHMS1009393-supplement-Supplemental_material_3.pdf [file NIHMS1009393-supplement-Supplemental_material_3.pdf]

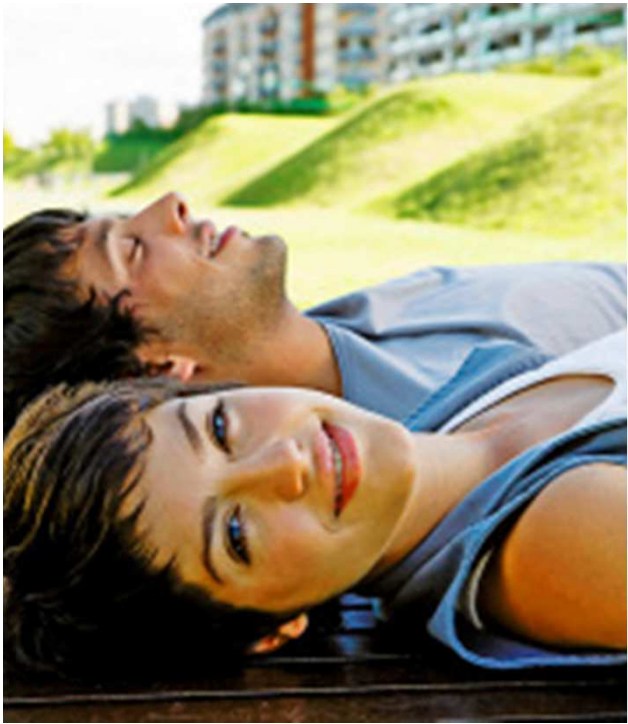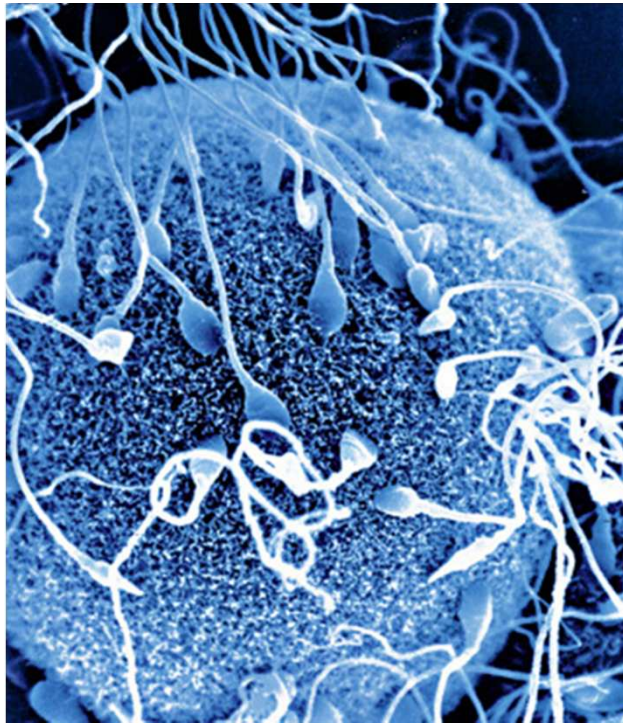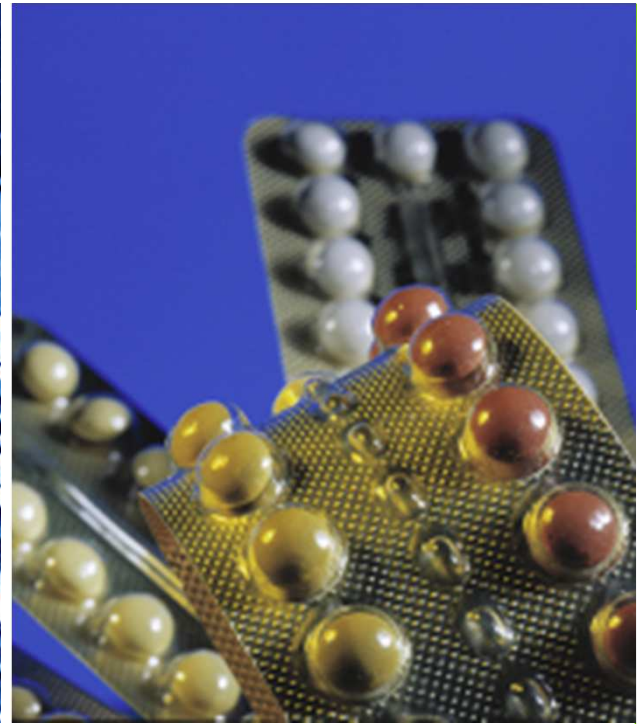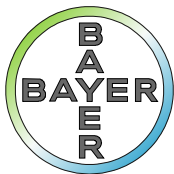

Science For A Better Life

## Drug interactions with hormonal contraceptives (HCs)

Assessing potential drug interactions with HCs during drug development at Bayer

Nov 9<sup>th</sup>, 2015 - Joachim Höchel, Herbert Wiesinger

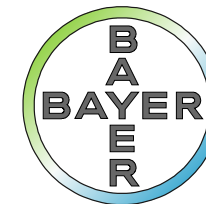

# Disclosures

- Joachim Höchel and Herbert Wiesinger are full time employees of Bayer Pharma AG, Berlin, Germany
- Joachim Höchel and Herbert Wiesinger are stockholder in Bayer (BAY001)

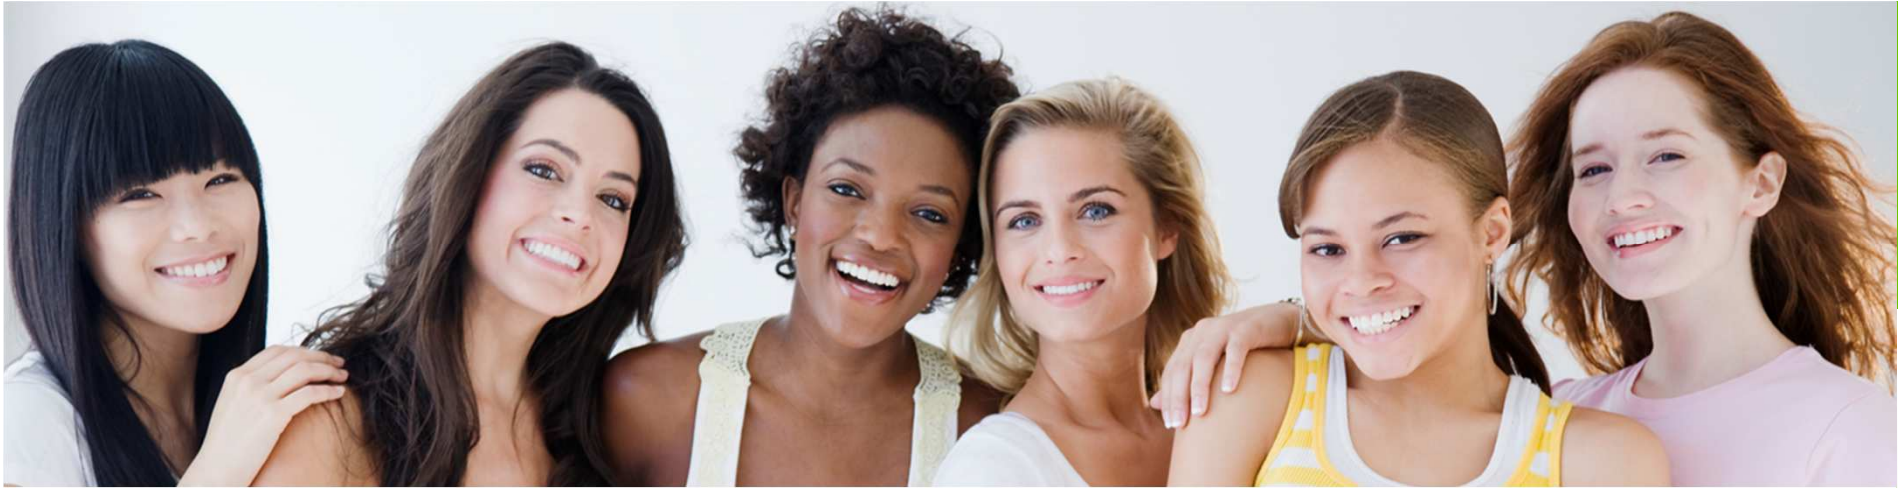

## Agenda

- Drug development paradigm at Bayer
- Effect of CYP3A4 inhibitors/inducers on HCs
  - Overview of DDI experience with HCs at Bayer
  - Case example oral HCs
  - Case example transdermal contraceptive patch
- Progestins and estrogens as perpetrator drugs
- Assessment of clinical relevance of findings

# Drug development paradigm for assessing DDIs at Bayer

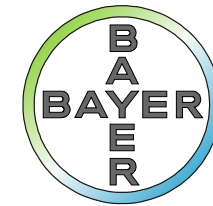

## Investigational compound as victim drug (I)

Understanding clearance mechanisms and elimination pathways, e.g.

- ***In vitro*** (liver microsomes, human hepatocytes, recombinant isoenzymes, isoenzyme specific inhibitors, transfected cells) experiments:
  - Metabolite identification
  - CYP/UGT reaction phenotyping, other enzymes
  - Transporter substrate characteristics
- ***In vivo*** mass balance / biotransformation pathways in humans
- Absolute bioavailability study in humans

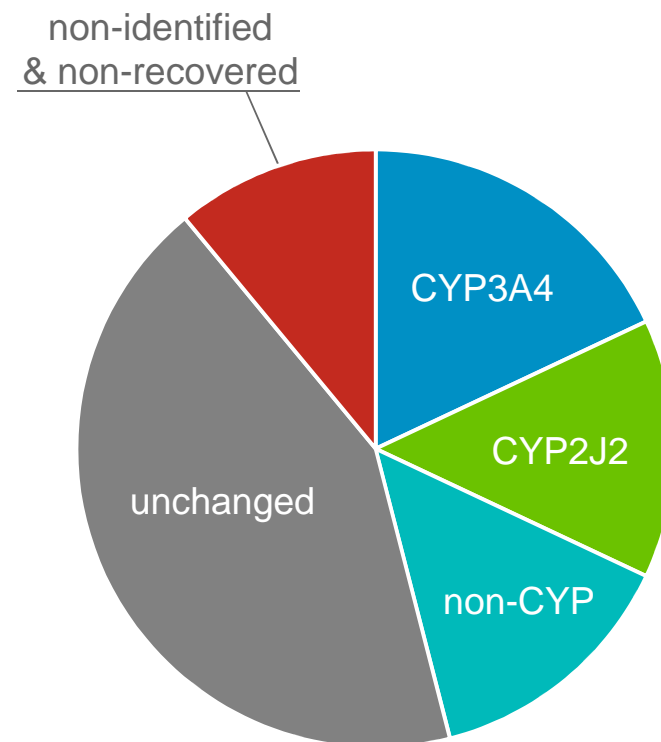

Rivaroxaban clearance  
Mück et al. Br J Clin Pharmacol. 2013

# Drug development paradigm for assessing DDIs at Bayer



## Investigational compound as victim drug (II)

Assessment of *in vivo* DDI potential in humans, e.g.

- Evaluation of DDI potential with enzymes contributing  $\geq 25\%$  of total clearance pathway (confirming *in vitro* results)
- **Mechanistic approach** (supported by physiological based PK modeling), e.g. starting with most potent inhibitor of metabolic enzymes/transporter
- Complemented by
  - Broad *in vitro* screening of potential co-medications
  - *In vivo* DDI studies for common co-medications
  - Population PK DDI covariate analysis in patient studies



# Drug development paradigm for assessing DDIs at Bayer

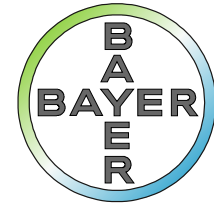

## Investigational compound as perpetrator drug

### Identification/exclusion of inhibitory/induction potential

- ***In vitro***
  - CYP/UGT inhibition (human liver microsomes, human hepatocytes, incl. CYP3A4 mechanism based inhibition) experiments using enzyme-selective substrates
  - CYP induction (human hepatocytes) experiments
  - Transporter inhibition
  - DDI studies (selected co-medications)

### Assessment of *in vivo* DDI potential

- Mechanistic approach based on *in vitro* data using a sensitive substrate of affected metabolic enzymes or transporter
- DDI study applying therapeutic dose of perpetrator drug

# Timing of drug metabolism/ transporter studies

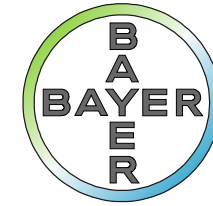

## **In vitro** studies:

- Metabolite identification
- CYP & transporter
  - phenotyping
  - inhibition
- CYP induction

*Refined DDI package  
in vitro & in vivo*

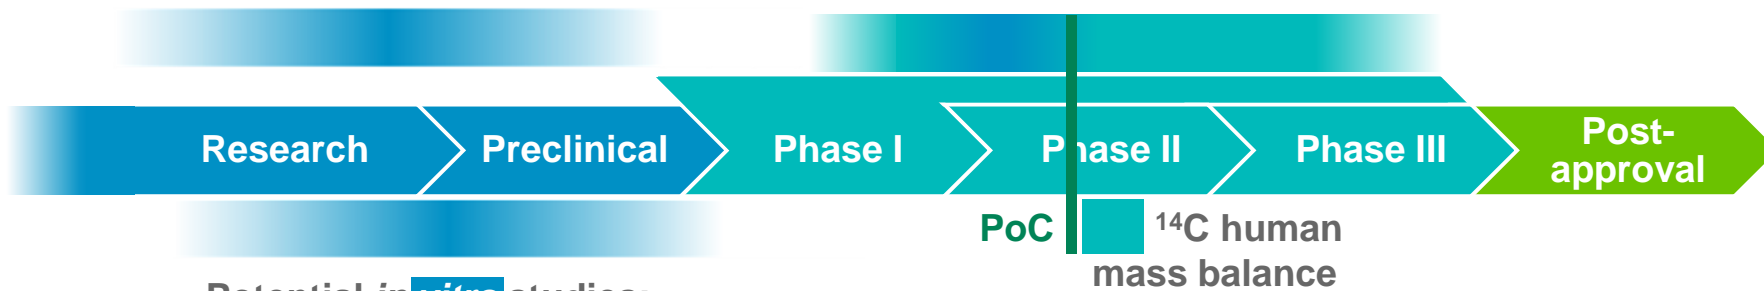

## Potential **in vitro** studies:

- UGT phenotyping
- UGT inhibition
- Others: e.g. AKR, SULT

Embryo-fetal toxicity studies  
(before use in women of  
childbearing potential)

# HC development in the context of emerging DDI experience



- Most HCs developed before established availability of tools to investigate CYP enzymes and transporters and general awareness of DDIs

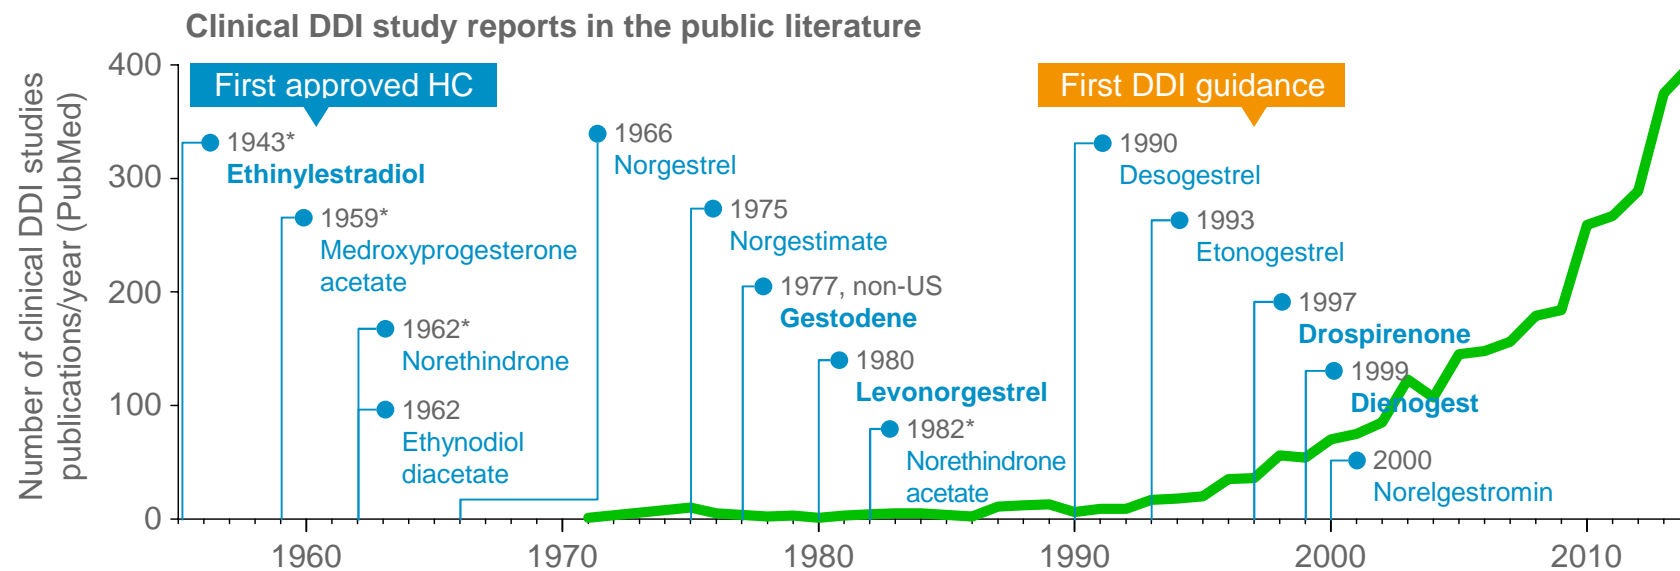

Marketed HCs in US (status Oct 2015); USAN filing year (or first FDA approval year\*)





## Agenda

- Drug development paradigm at Bayer
- **Effect of CYP3A4 inhibitors/inducers on HCs**
  - Overview of DDI experience with HCs at Bayer
  - Case example oral HCs
  - Case example transdermal contraceptive patch
- Progestins and estrogens as perpetrator drugs
- Assessment of clinical relevance of findings

# Clinical DDI experience with HCs at BAYER - HCs as victim drug (CYP3A4 perpetrator drugs)

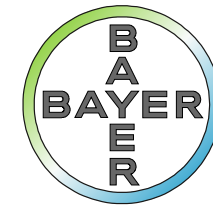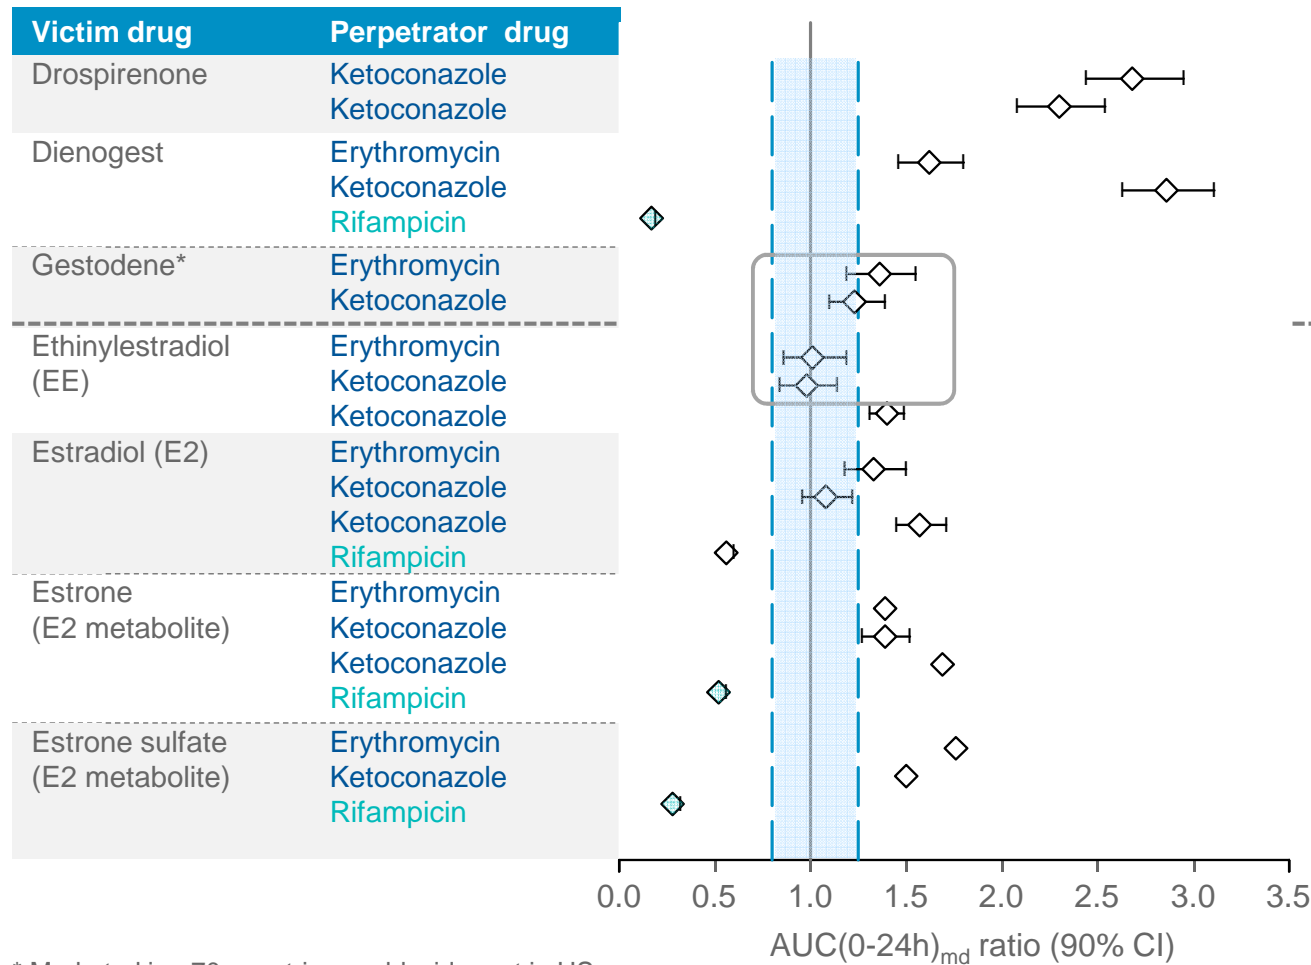



## Agenda

- Drug development paradigm at Bayer
- Effect of CYP3A4 inhibitors/inducers on HCs
  - Overview of DDI experience with HCs at Bayer
  - **Case example oral HCs**
  - Case example transdermal contraceptive patch
- Progestins and estrogens as perpetrator drugs
- Assessment of clinical relevance of findings

# CYP3A4 inhibition (HC as victim drug)

## Effect of ketoconazole (KTZ) on YAZ

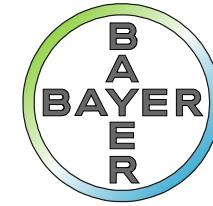

### Study design: open-label, one-way crossover in fertile women

#### Cohort 1 (N=22 per arm)

Days

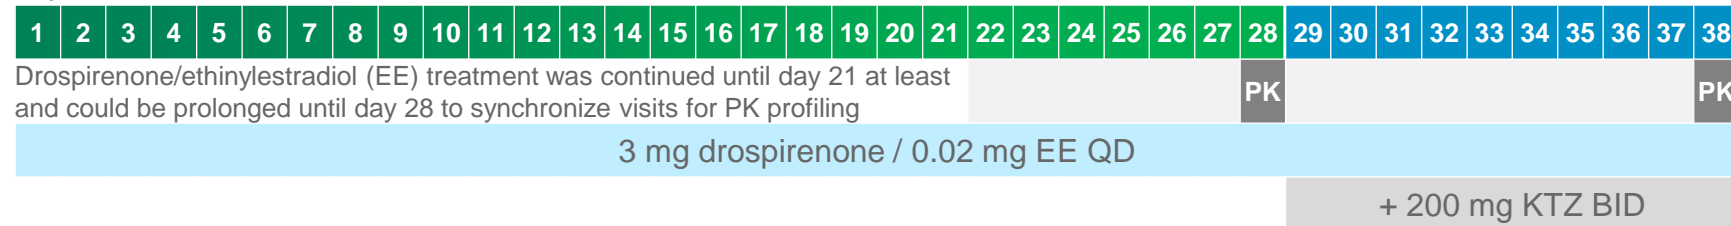

#### Interim analysis

The group sequential approach allowed to stop the study for futility (or success, if applicable) after the planned interim analysis

#### Cohort 2, optional (N=22 per arm)

Days

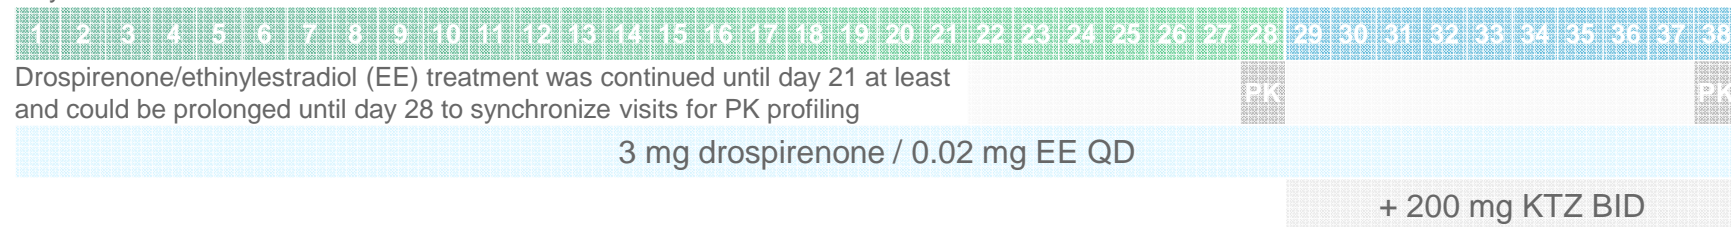

QD: once daily, BID: twice

Wiesinger et al. Br J Clin Pharmacol. 2015

# CYP3A4 inhibition (HC as victim drug)

## Effect of KTZ on YAZ - Results

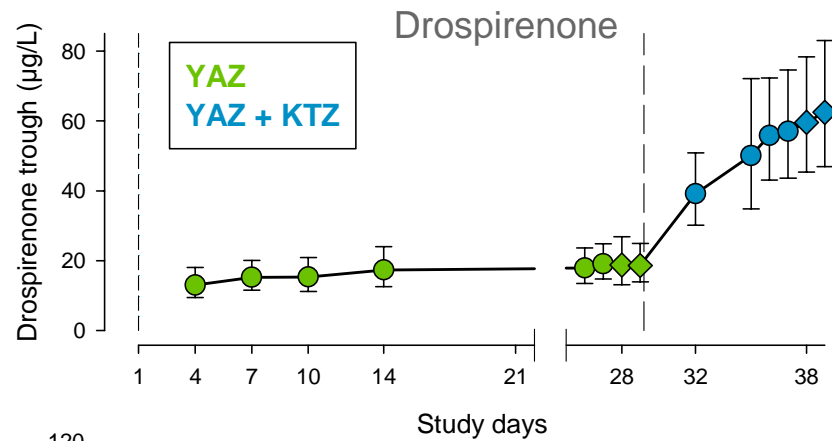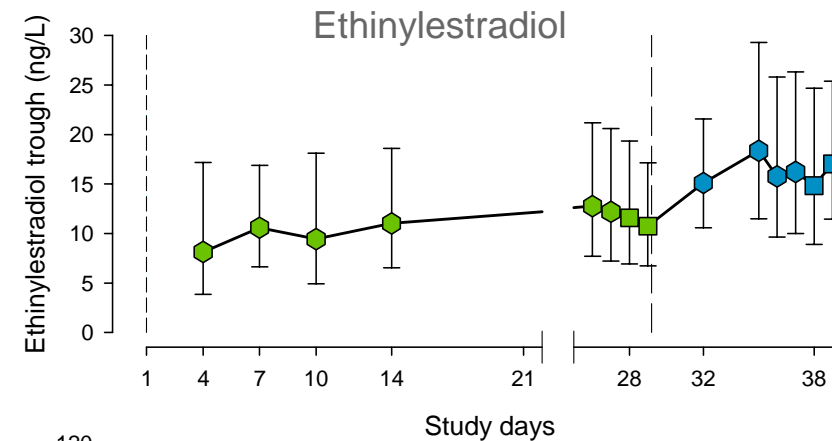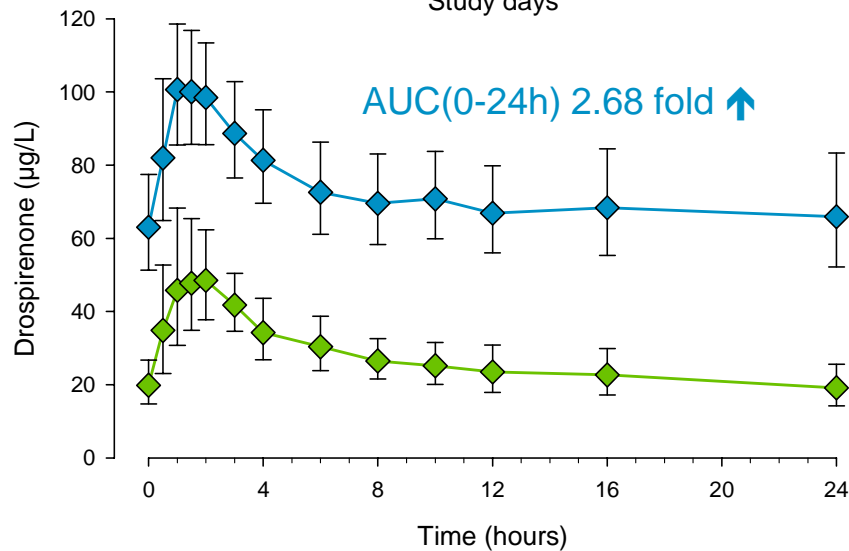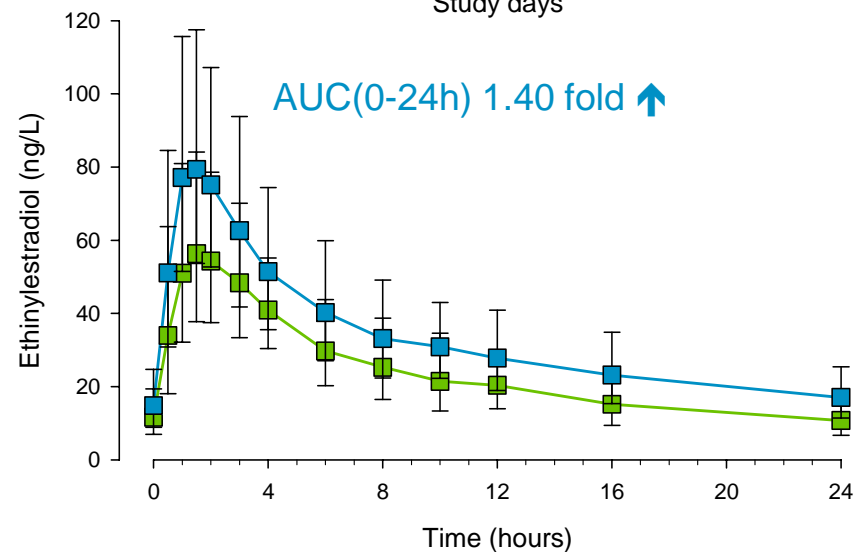

# CYP3A4 inhibition (HC as victim drug)

## Effect of KTZ on YAZ - Conclusions

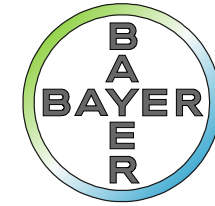

- CYP3A4 contributes to elimination of EE and drospirenone
- Observed exposure increases are not expected to translate into increased safety risks
- General HC “class label” applicable (complemented by specific study data)

### **Drospirenone family USPI's (2015)**

#### **Section 7 DRUG INTERACTIONS**

Substances increasing the plasma concentrations of COCs: ...

**Concomitant administration of moderate or strong CYP3A4 inhibitors such as azole antifungals (e.g., ketoconazole, itraconazole, voriconazole, fluconazole), verapamil, macrolides (e.g., clarithromycin, erythromycin), diltiazem, and grapefruit juice can increase the plasma concentrations of the estrogen or the progestin or both. ...**





## Agenda

- Drug development paradigm at Bayer
- Effect of CYP3A4 inhibitors/inducers on HCs
  - Overview of DDI experience with HCs at Bayer
  - Case example oral HCs
  - **Case example transdermal contraceptive patch**
- Progestins and estrogens as perpetrator drugs
- Assessment of clinical relevance of findings

# Non-oral administration Transdermal contraceptive patch

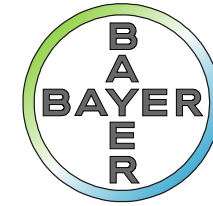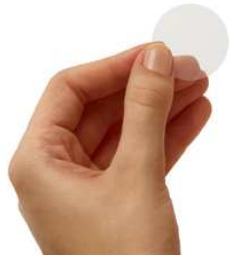

**apleek** a once-a-week, 21 day regimen patch for HC\*

- Exposures correspond to a combined oral contraceptive containing 0.02 mg EE and 0.06 mg gestodene (GSD)

**Meliane** once-daily oral tablet (0.02 mg EE / 0.075 mg GSD)

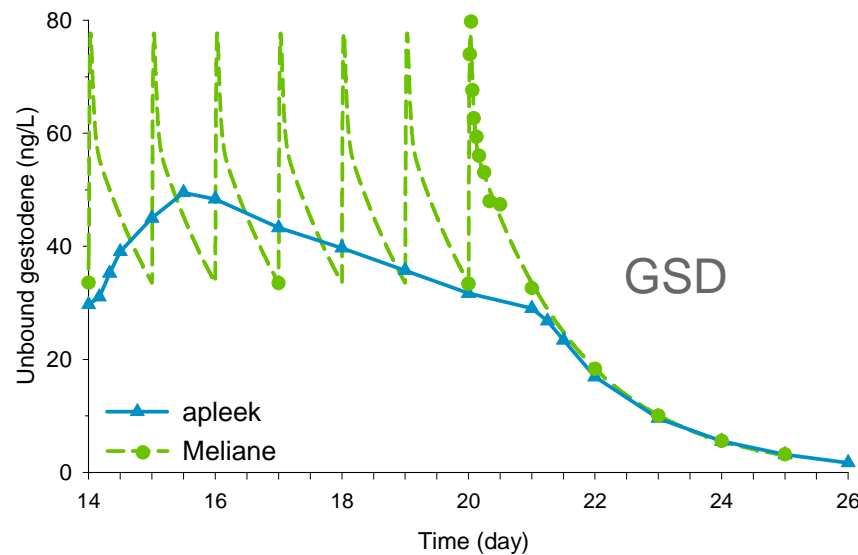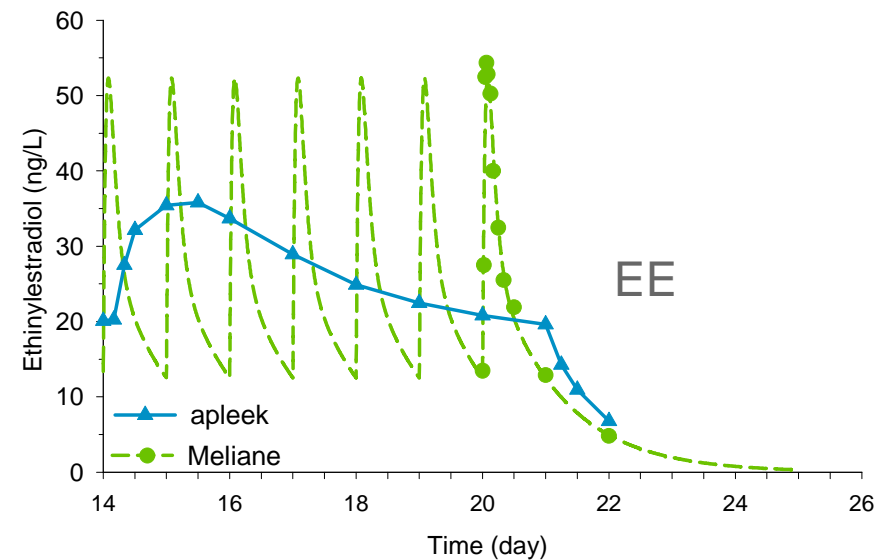

\* apleek contains 0.55 mg ethinylestradiol (EE) and 2.1 mg gestodene (GSD), not approved in US

# CYP3A4 inhibition (HC as victim drug)

Effect of erythromycin (ERY) and KTZ on apleek



Study design: open-label, one-way crossover in fertile women

**Erythromycin (ERY) Day 8-21: 500 mg TID**

| Period 1 |   |   |   |   |   |   |       |   |    |    |    |    |    |       |    |    |    |    |    |        |
|----------|---|---|---|---|---|---|-------|---|----|----|----|----|----|-------|----|----|----|----|----|--------|
| patch    |   |   |   |   |   |   | patch |   |    |    |    |    |    | patch |    |    |    |    |    | P<br>K |
| 1        | 2 | 3 | 4 | 5 | 6 | 7 | 8     | 9 | 10 | 11 | 12 | 13 | 14 | 15    | 16 | 17 | 18 | 19 | 20 |        |

| Period 2 |   |   |   |   |   |   |             |   |    |    |    |    |    |             |    |    |    |    |    |        |
|----------|---|---|---|---|---|---|-------------|---|----|----|----|----|----|-------------|----|----|----|----|----|--------|
| patch    |   |   |   |   |   |   | patch + ERY |   |    |    |    |    |    | patch + ERY |    |    |    |    |    | P<br>K |
| 1        | 2 | 3 | 4 | 5 | 6 | 7 | 8           | 9 | 10 | 11 | 12 | 13 | 14 | 15          | 16 | 17 | 18 | 19 | 20 |        |

**Ketoconazole (KTZ) Day 15-21: 200 mg BID**

| Period 1 |   |   |   |   |   |   |       |   |    |    |    |    |    |       |    |    |    |    |    |        |
|----------|---|---|---|---|---|---|-------|---|----|----|----|----|----|-------|----|----|----|----|----|--------|
| patch    |   |   |   |   |   |   | patch |   |    |    |    |    |    | patch |    |    |    |    |    | P<br>K |
| 1        | 2 | 3 | 4 | 5 | 6 | 7 | 8     | 9 | 10 | 11 | 12 | 13 | 14 | 15    | 16 | 17 | 18 | 19 | 20 |        |

| Period 2 |   |   |   |   |   |   |       |   |    |    |    |    |    |             |    |    |    |    |    |        |
|----------|---|---|---|---|---|---|-------|---|----|----|----|----|----|-------------|----|----|----|----|----|--------|
| patch    |   |   |   |   |   |   | patch |   |    |    |    |    |    | patch + KTZ |    |    |    |    |    | P<br>K |
| 1        | 2 | 3 | 4 | 5 | 6 | 7 | 8     | 9 | 10 | 11 | 12 | 13 | 14 | 15          | 16 | 17 | 18 | 19 | 20 |        |

Winkler et. al. Eur J Drug Metab Pharmacokinet. 2014

# CYP3A4 inhibition (HC as victim drug)

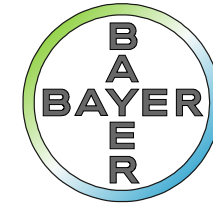

## Effect of ERY and KTZ on apleek

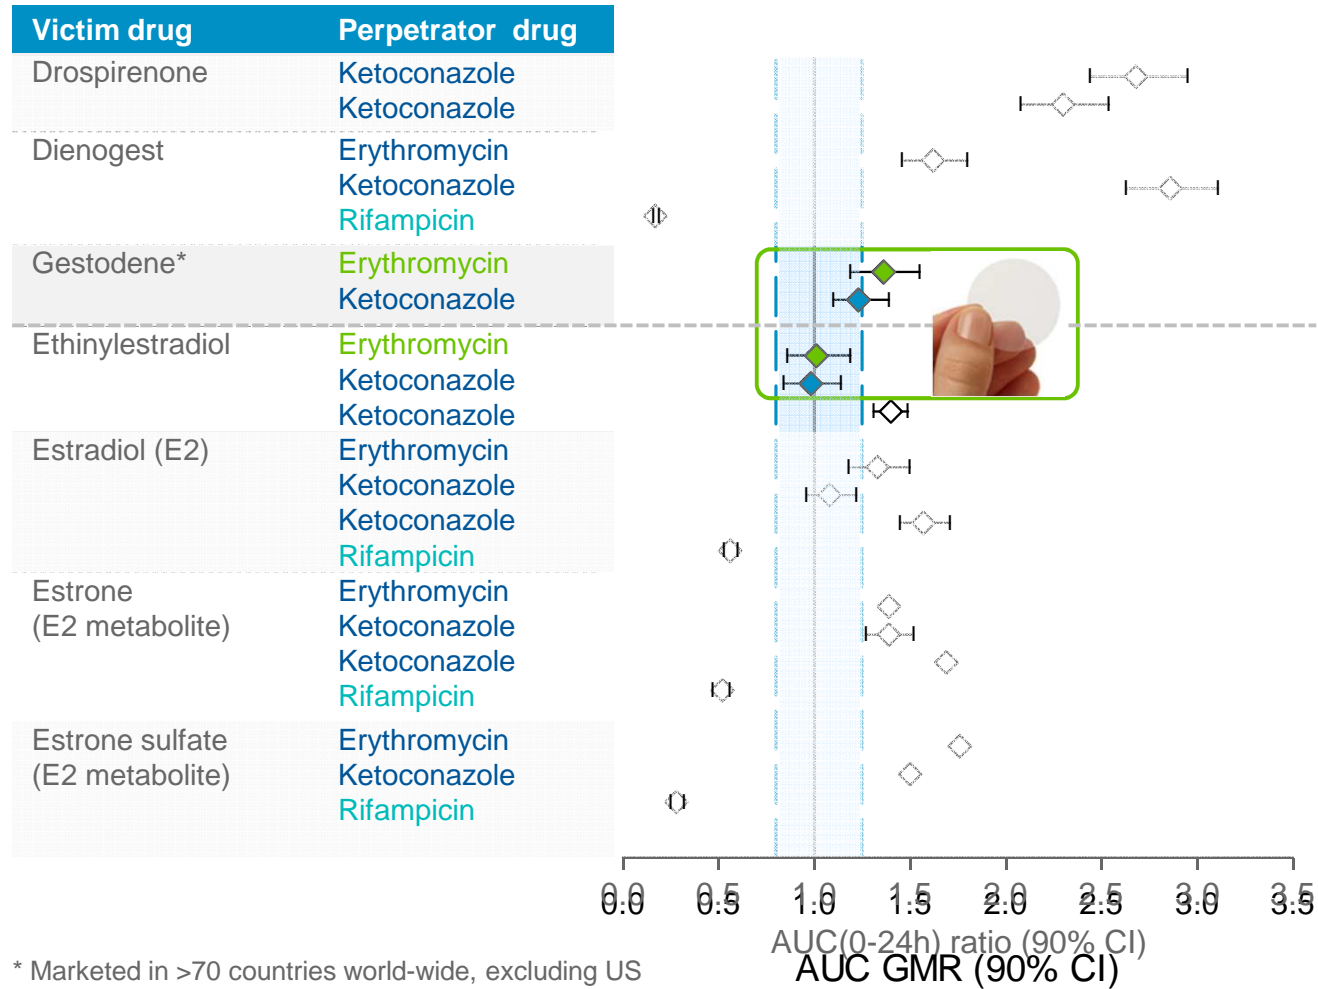



## Agenda

- Drug development paradigm at Bayer
- Effect of CYP3A4 inhibitors/inducers on HCs
  - Overview of DDI experience with HCs at Bayer
  - Case example oral HCs
  - Case example transdermal contraceptive patch
- **Progestins and estrogens as perpetrator drugs**
- Assessment of clinical relevance of findings

# Clinical DDI experience with HCs (literature)

## HCs as perpetrator drug (CYP1A2 substrates)

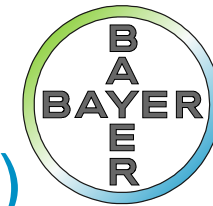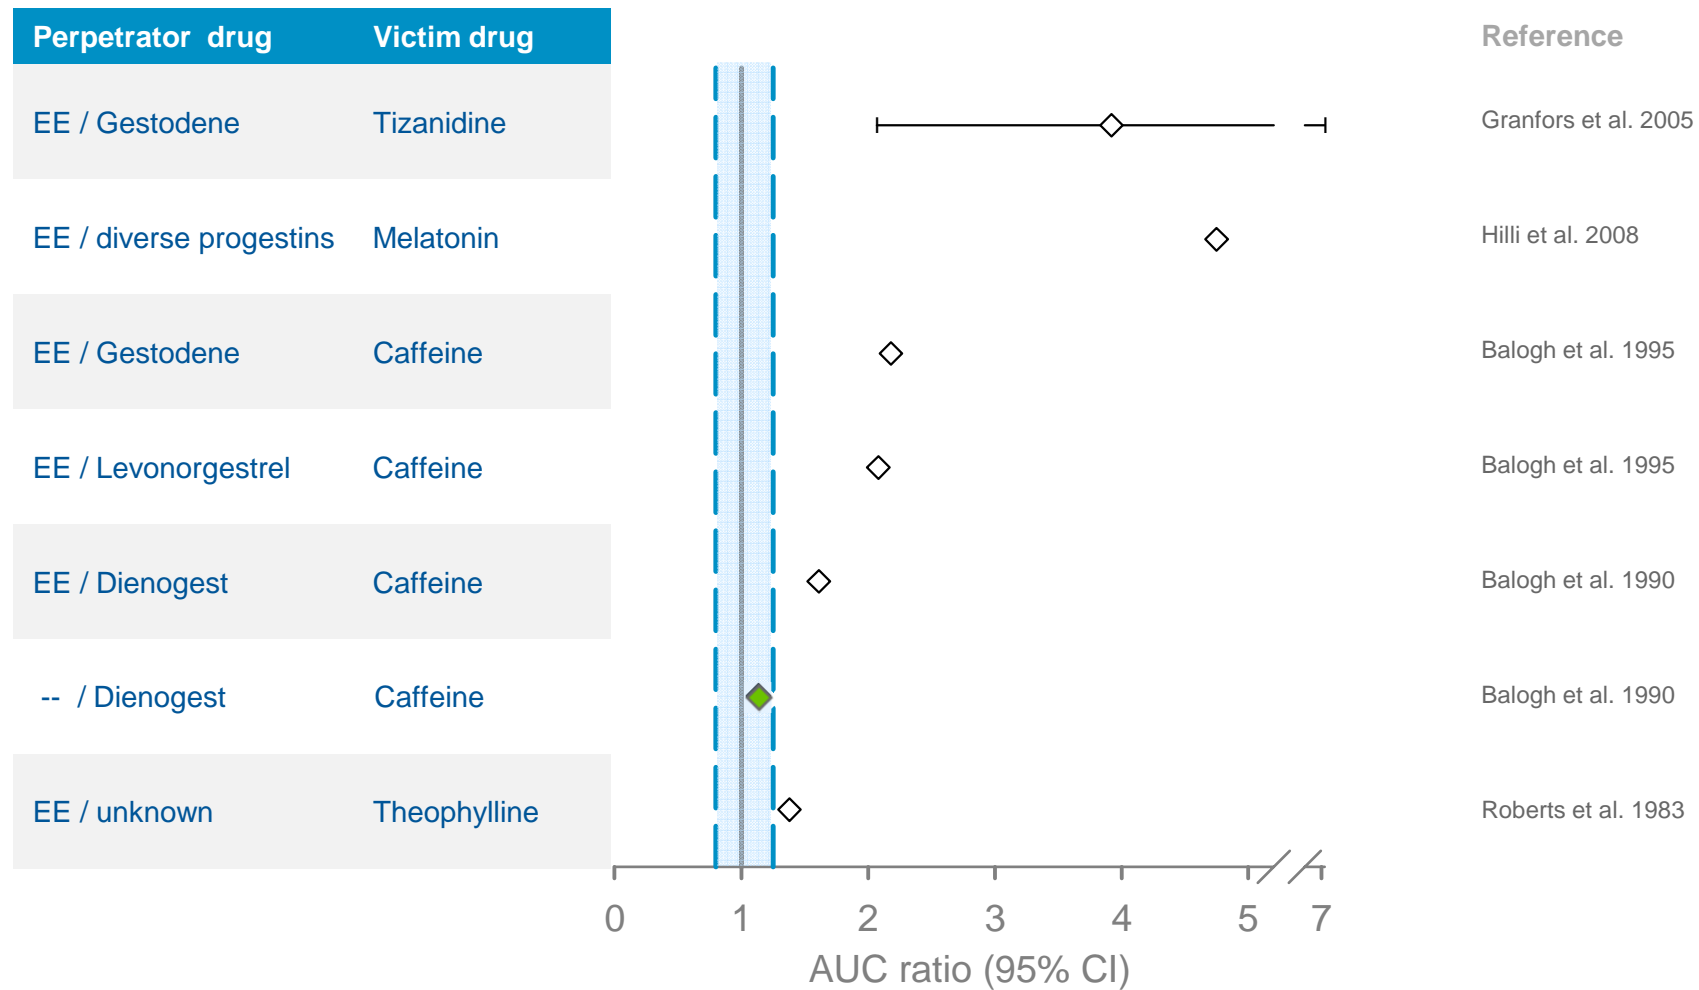



# Clinical DDI experience with HCs

## HCs as perpetrator drug (CYP3A4 substrates)

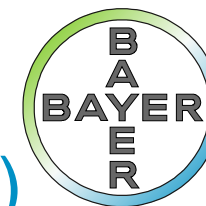

| Perpetrator drug    | Victim drug      |
|---------------------|------------------|
| Drospirenone        | Simvastatin      |
|                     | Midazolam        |
|                     | 5-OH Omeprazole* |
|                     | Omeprazole-SO    |
| EE / Dienogest      | Nifedipine       |
| EE / Gestodene      | Nifedipine       |
|                     | Midazolam        |
|                     | Midazolam**      |
| EE / Desogestrel    | Nifedipine       |
| EE / Norgestrel     | Midazolam**      |
| EE / Levonorgestrel | Nifedipine       |

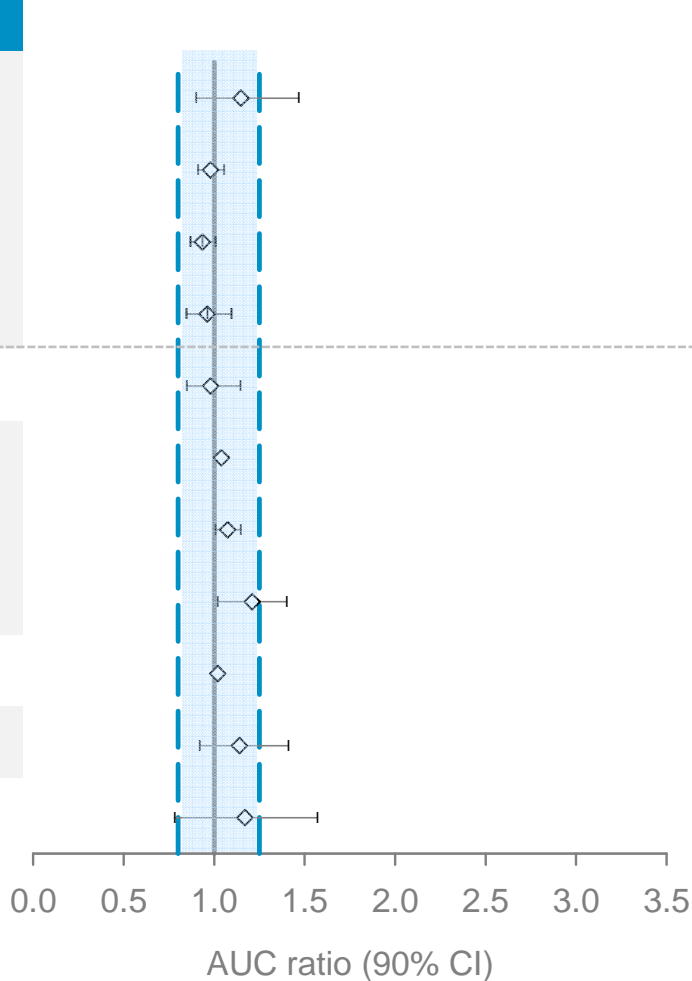

Reference

Palovaara et al. 2000

Belle et al. 2002

\* CYP2C19 substrate

\*\* arithmetic mean ratio and 95% CI  
(all others geometric mean ratios)

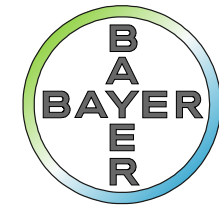

# Effect of EE and E2 on progestin PK

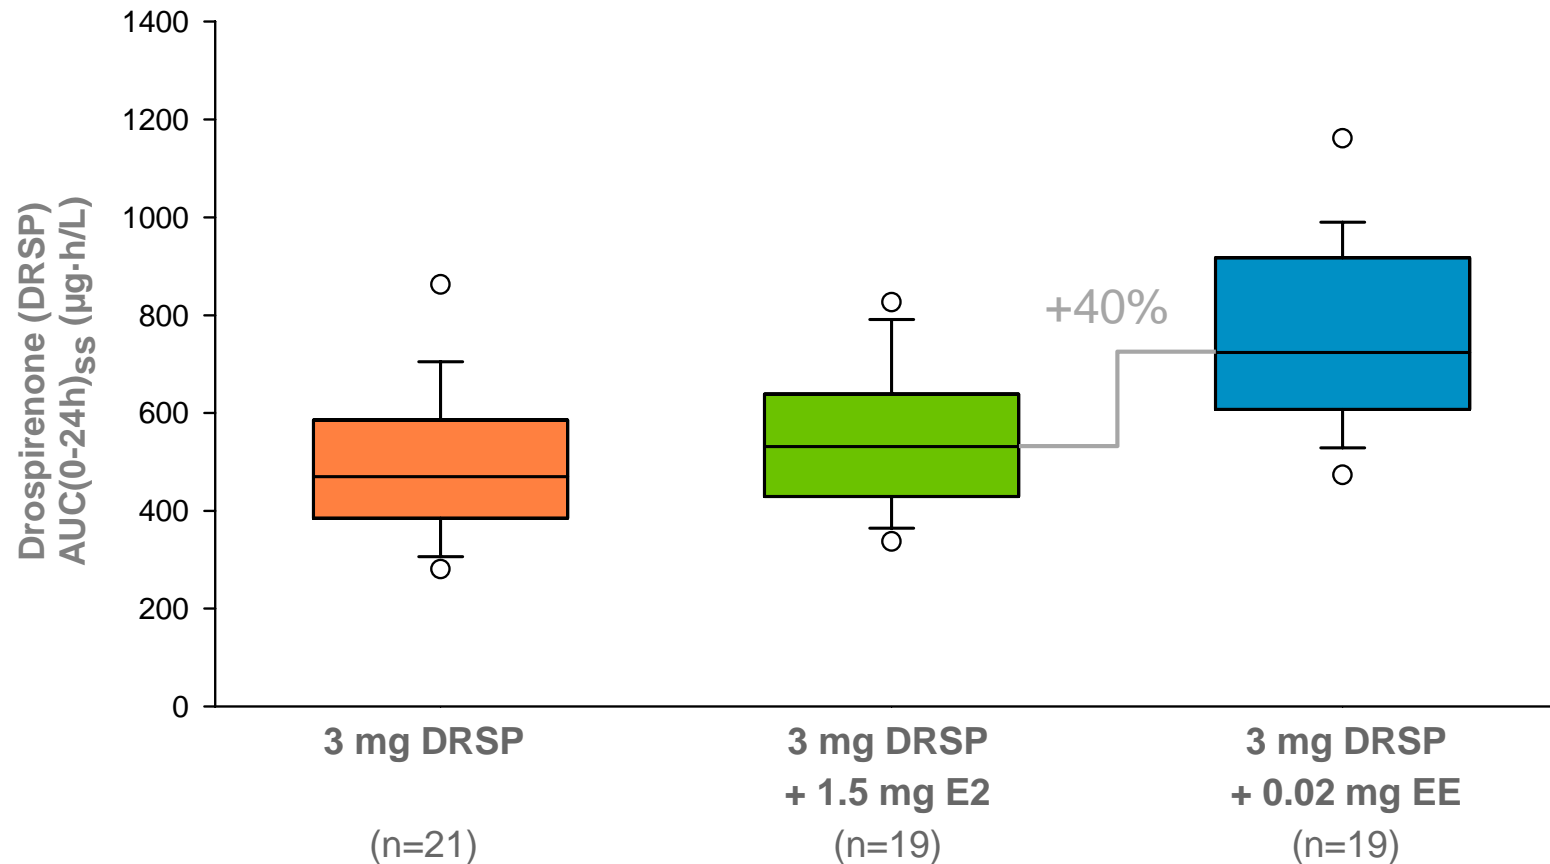

Box = 25<sup>th</sup>, 50<sup>th</sup> and 75<sup>th</sup> percentiles; error bars = 90<sup>th</sup> and 10<sup>th</sup> percentiles; open symbols = 5<sup>th</sup> and 95<sup>th</sup> percentiles



## Agenda

- Drug development paradigm at Bayer
- Effect of CYP3A4 inhibitors/inducers on HCs
  - Overview of DDI experience with HCs at Bayer
  - Case example oral HCs
  - Case example transdermal contraceptive patch
- Progestins and estrogens as perpetrator drugs
- **Assessment of clinical relevance of findings**

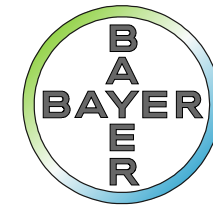

# Clinical relevance of DDIs

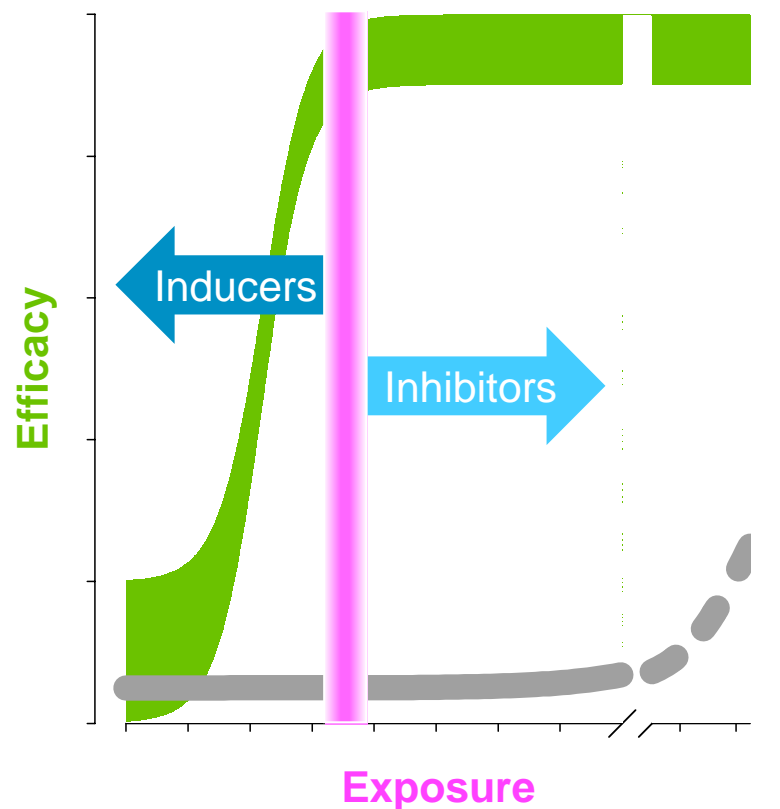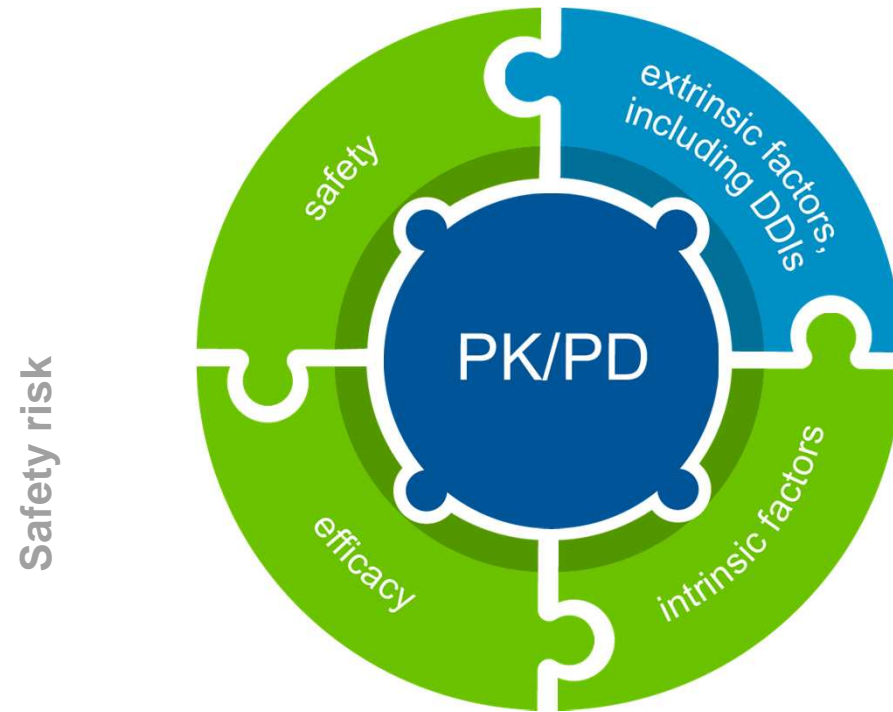

DDI to be assessed in totality of data on PK/PD relationship regarding efficacy and safety, including considerations of overall variability, influence of intrinsic and other extrinsic factors

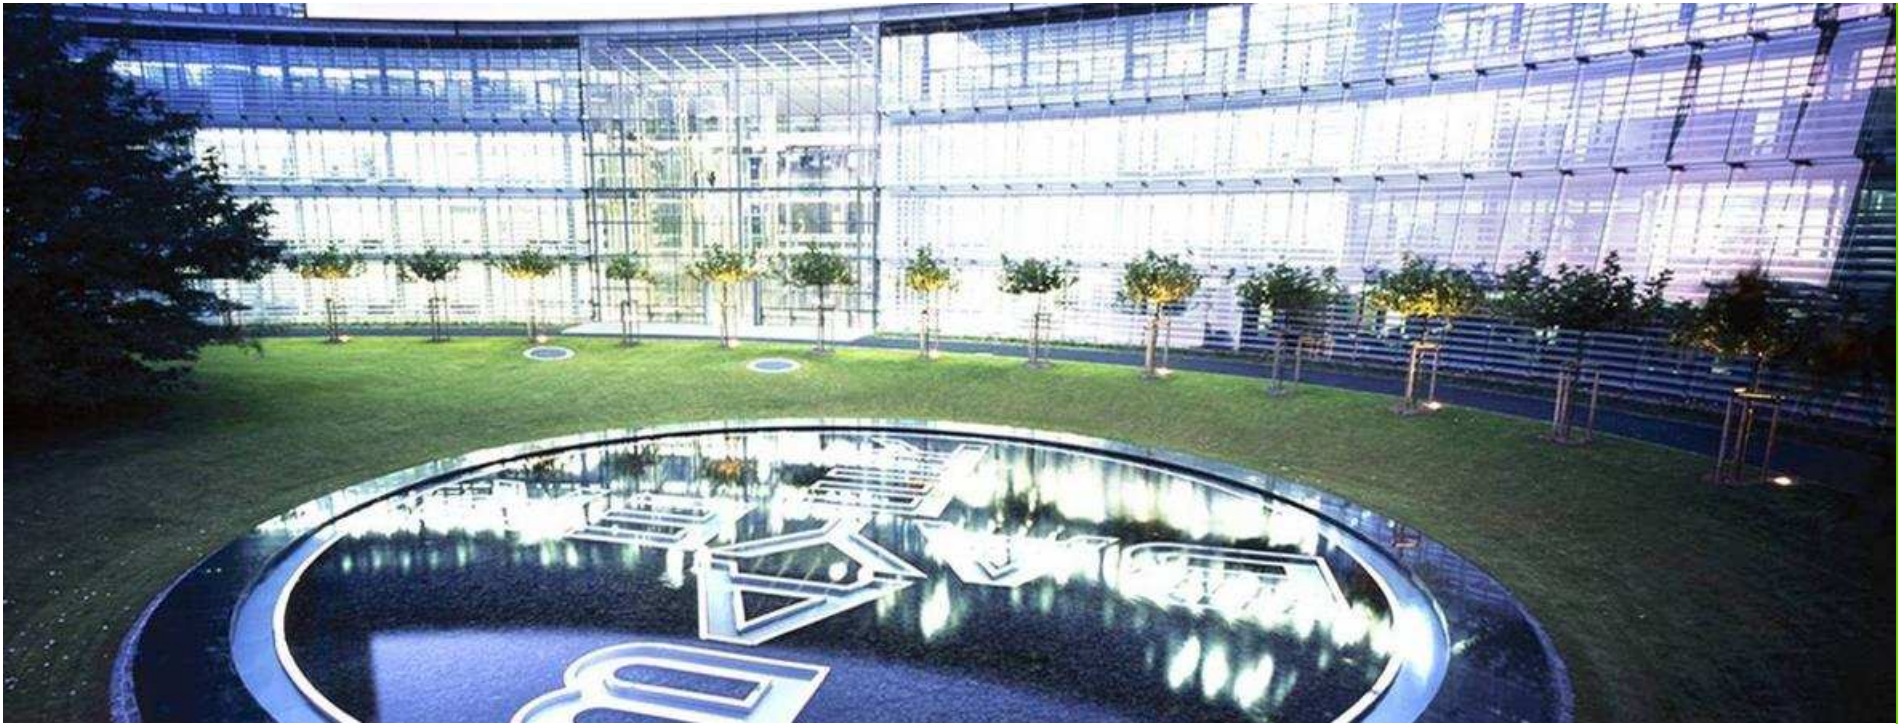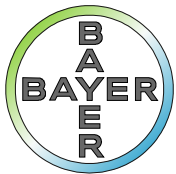

Science For A Better Life

*Thank you!*



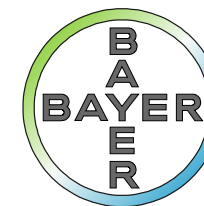

# Abbreviations

|            |                                                                   |      |                                             |
|------------|-------------------------------------------------------------------|------|---------------------------------------------|
| AKR        | aldoketoreductase                                                 | HC   | hormonal contraceptive                      |
| AUC        | area under the concentration vs. time curve from zero to infinity | KTZ  | ketoconazole                                |
| AUC(0-24h) | AUC from zero to 24h                                              | md   | multiple dose                               |
| BID        | bis in die (twice a day)                                          | N    | number                                      |
| CI         | confidence interval                                               | OH   | hydroxy                                     |
| CL         | clearance                                                         | PD   | pharmacodynamics                            |
| COC        | combined oral contraceptive                                       | PK   | pharmacokinetics                            |
| CYP        | cytochrome P450                                                   | PoC  | proof of concept                            |
| DDI        | drug drug interaction                                             | QD   | quaque die (once a day)                     |
| DRSP       | drospirenone                                                      | SO   | sulfate                                     |
| E2         | estradiol                                                         | ss   | steady state                                |
| EE         | ethinylestradiol                                                  | SULT | sulfotransferase                            |
| ERY        | erythromycin                                                      | UGT  | uridine diphosphate glucuronosyltransferase |
| FDA        | Food and Drug Administration                                      | USAN | United States Adopted Name                  |
| GSD        | gestodene                                                         | US   | United States                               |
|            |                                                                   | USPI | United States Product Insert                |





# References

- BALOGH, A., LIEWALD, T., LIEWALD, S., SCHRODER, S., KLINGER, G., SPLINTER, F. C. & HOFFMANN, A. 1990. [Effect of a new gestagen--dienogest--and its combination with ethinyl estradiol on the activity of biotransformation reactions]. *Zentralbl Gynakol*, 112, 735-46
- BALOGH, A., KLINGER, G., HENSCHER, L., BORNER, A., VOLLANTH, R. & KUHNZ, W. 1995. Influence of ethinylestradiol-containing combination oral contraceptives with gestodene or levonorgestrel on caffeine elimination. *Eur J Clin Pharmacol*, 48, 161-6.
- BELLE, D. J., CALLAGHAN, J. T., GORSKI, J. C., MAYA, J. F., MOUSA, O., WRIGHTON, S. A. & HALL, S. D. 2002. The effects of an oral contraceptive containing ethinylestradiol and norgestrel on CYP3A activity. *Br J Clin Pharmacol*, 53, 67-74.
- GRANFORS, M. T., BACKMAN, J. T., LAITILA, J. & NEUVONEN, P. J. 2005. Oral contraceptives containing ethinyl estradiol and gestodene markedly increase plasma concentrations and effects of tizanidine by inhibiting cytochrome P450 1A2. *Clin Pharmacol Ther*, 78, 400-11.
- HILLI, J., KORHONEN, T., TURPEINEN, M., HOKKANEN, J., MATTILA, S. & LAINE, K. 2008. The effect of oral contraceptives on the pharmacokinetics of melatonin in healthy subjects with CYP1A2 g.-163C>A polymorphism. *J Clin Pharmacol*, 48, 986-94.
- MUECK, W., KUBITZA, D. & BECKA, M. 2013. Co-administration of rivaroxaban with drugs that share its elimination pathways: pharmacokinetic effects in healthy subjects. *Br J Clin Pharmacol*, 76, 455-66.
- PALOVAARA, S., KIVISTO, K. T., TAPANAINEN, P., MANNINEN, P., NEUVONEN, P. J. & LAINE, K. 2000. Effect of an oral contraceptive preparation containing ethinylestradiol and gestodene on CYP3A4 activity as measured by midazolam 1'-hydroxylation. *Br J Clin Pharmacol.*, 50(4), 333-7.
- ROBERTS, R. K., GRICE, J., MCGUFFIE, C. & HEILBRONN, L. 1983. Oral contraceptive steroids impair the elimination of theophylline. *J Lab Clin Med*, 101, 821-5.
- WIESINGER, H., BERSE, M., KLEIN, S., GSCHWEND, S., HOCHER, J., ZOLLMANN, F. S. & SCHUTT, B. 2015. Pharmacokinetic interaction between the CYP3A4 inhibitor ketoconazole and the hormone drospirenone in combination with ethinylestradiol or estradiol. *Br J Clin Pharmacol*.
- WINKLER, J., GOLDAMMER, M., LUDWIG, M., ROHDE, B. & ZURTH, C. 2014. Pharmacokinetic drug-drug interaction between ethinyl estradiol and gestodene, administered as a transdermal fertility control patch, and two CYP3A4 inhibitors and a CYP3A4 substrate. *Eur J Drug Metab Pharmacokinet*.
