# Supplementary material
Source: PubMed Central journal article supplement (PMC11022830)
Supplement: NIHMS1009393-supplement-Supplemental_material_8.pdf [file NIHMS1009393-supplement-Supplemental_material_8.pdf]

# Survey: Drug-Drug Interactions Between Hormonal Contraceptives and Drugs with Teratogenic Potential

**November 9, 2015**

**Li Li, Ph.D.**

**Office of Clinical Pharmacology,  
Office of Translations Sciences**

**CDER, FDA**

# Disclaimer

- I have no conflicts of interest
- The opinions expressed in this presentation are mine and do not necessarily reflect the official views of the United States Food and Drug Administration (FDA)

# Background

- When females of reproductive potential (FRP) need to take teratogenic drugs, prevention of pregnancy is critical to mitigate teratogenic risk
- Several factors may decrease contraceptive effectiveness
  - Drug- Hormonal Contraceptive (HC) Interaction

Impact on HC is the key information to recommend reliable contraceptive methods

## Background-cont.

- **Current FDA Drug-Drug Interaction (DDI) Guidance:**

There may be mechanisms of induction that are presently unknown

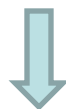

a potential human teratogen needs to be studied *in vivo* for effects on contraceptive steroids if the drug is intended for use in fertile women, regardless of *in vitro* induction study results

<http://www.fda.gov/downloads/drugs/guidancecomplianceregulatoryinformation/guidances/ucm292362.pdf>

# Objective of the Survey

## **Understanding the Current Practices for**

- Conducting clinical DDI study between HC and potentially teratogenic drugs
- Using clinical DDI results to inform effective contraception methods in clinical trials and product labels

# Methods

## **Recently approved new molecular entities (NMEs) with teratogenic potential**

- 107 NMEs: approved in 2012 – 2014
- 18 NMEs: “teratogenic potential” per product label

## Method-cont.

- Were Clinical DDI studies with HCs conducted ?
  - Study results & before Phase 3 studies ?
  - *In vitro* data: NME with CYP enzyme induction potential
- Was HC use allowed in Phase 3 trials?
  - Decision-making based on clinical DDI data?
- Are DDI findings reflected in the product labels?

# Results: Clinical DDI Studies with HC

## Of 18 NMEs with Teratogenic Potential

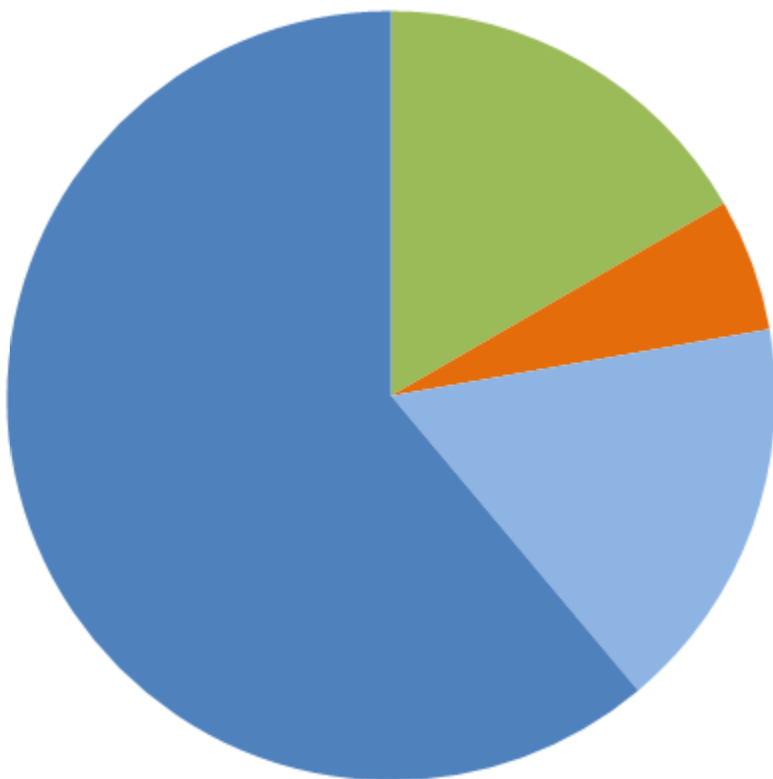

4 NMEs: Clinical DDI Studies Done

❖ 3: not inducer (in vitro): HC ↔

❖ 1: CYP3A4 induction (in vitro): HC↑

14 NMEs: Clinical DDI Studies **Not** Done

❖ 3 NMEs: CYP3A4 induction (in vitro)

4 clinical DDI studies were done **after** Phase 3 studies



# Results: HC Use in the Phase 3 Studies

**No DDI data available when Phase 3 studies were conducted**

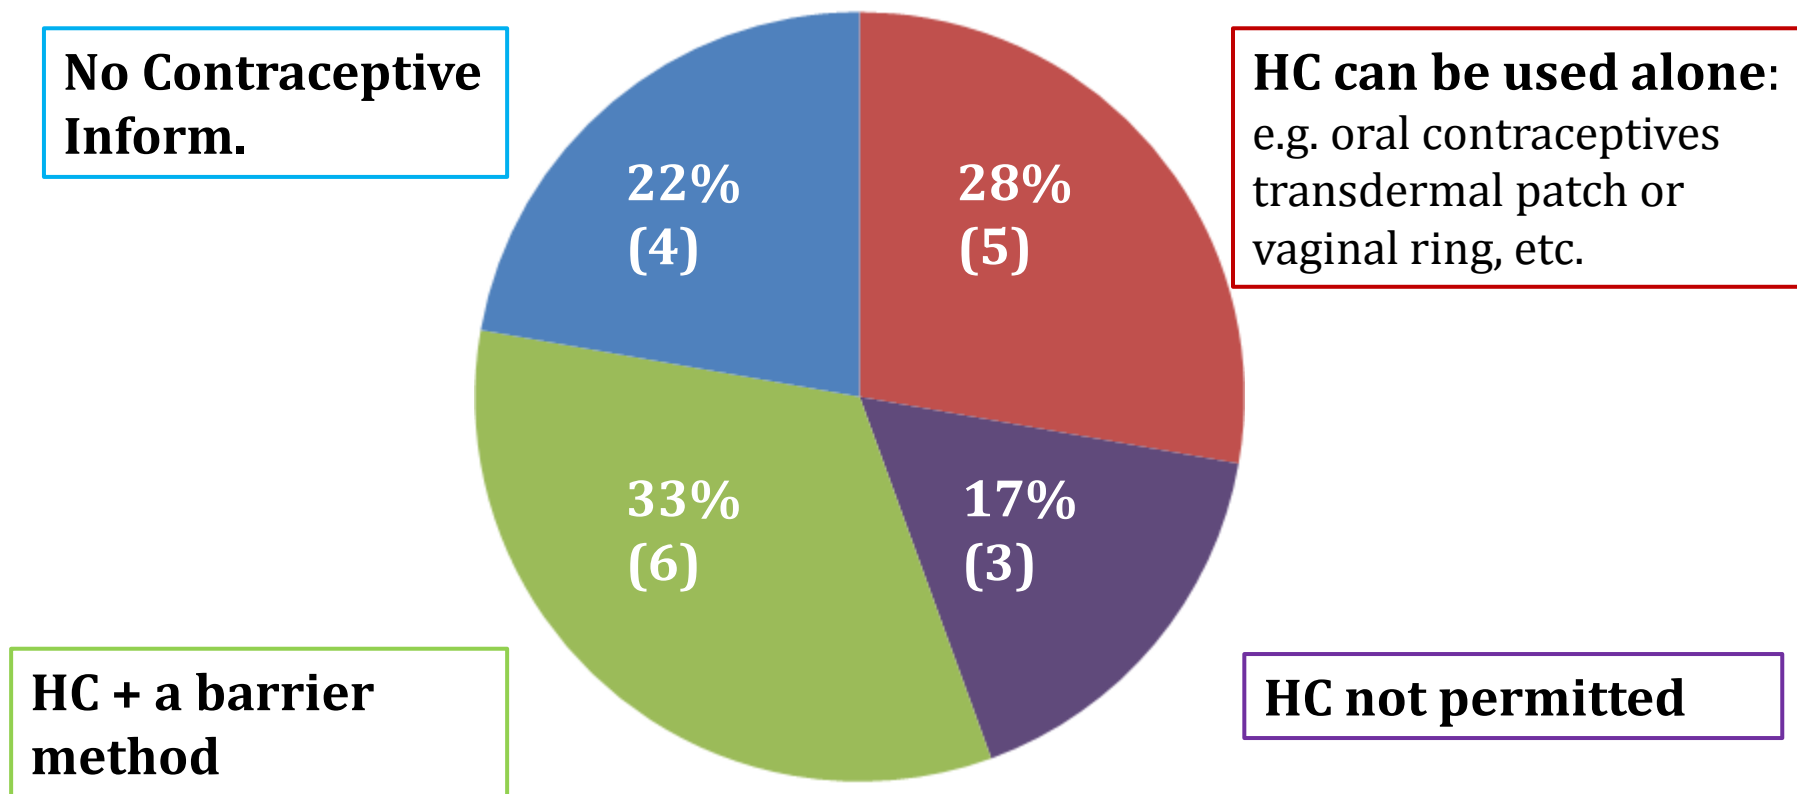

## Results: Label on DDI results & Contraception

- Reporting DDI results in the label: 3 out of 4 studies
- Teratogenic risk along with supporting data are stated in labels
- Instruction on Contraception
  - General Information: 50% (9/18):  
Require efficient contraception due to teratogenic risk
  - Specific Information on whether HC is a reliable method: 33% (6/18)
  - No Information on contraception: 17% (3/18)

## Case Example 1: Teriflunomide

- **Indication:** Treatment of multiple sclerosis
- ***In vitro* data:** CYP3A4 inducer
- **Clinical DDI study with CYP3A4 probe:** midazolam ↑ 27%
- **Clinical DDI study with HC:** HC ↑ by 41-54%

**Data source:**

<http://www.accessdata.fda.gov/scripts/cder/drugsatfda/index.cfm?fuseaction=Search.DrugDetails>

## Case Example 2: Dabrafenib

- **Indication:** treatment of cancer
- **In vitro data:** induction potential
- **Clinical DDI study with HC:** not conducted
- **Clinical DDI with CYP3A4 probe:** 74% reduction in midazolam

**Data source:**

[http://www.accessdata.fda.gov/scripts/cder/drugsatfda/index.cfm?fuseaction=Search.Label\\_ApprovalHistory#Apphist](http://www.accessdata.fda.gov/scripts/cder/drugsatfda/index.cfm?fuseaction=Search.Label_ApprovalHistory#Apphist)

# Summary

## Based on 18 NMEs with teratogenic potential

- Conducting clinical DDI studies with HC has not been a common practice
- Clinical trials (Phase 3 trials):
  - Significant variability with regard to contraception practices
  - Allowing use of HC without evidence from DDI study
- Product Label :
  - DDI studies with HC are reflected in the label
  - Instructions on reliable contraception are variable

## Take Home Messages

- Clinical DDI testing with HC is important to provide evidence-based guidance on reliable contraceptive method for FRP taking drugs with teratogenic potential
- Consistent practice to inform reliable contraceptive methods is needed to adequately protect women in clinical trials and after drug approvals.

# Acknowledgments

- Mee Ryung Ahn
- Myong-Jin Kim
- Melissa Tassinari
- LaiMing Lee
- Chongwoo Yu
- Jihong Shon
- Dennis Bashaw
- Hae Young Ahn
- Lisa Soule
- Dan Davis

# Teriflunomide

**Table: Teriflunomide as a substrate, inhibitor or inducer of CYPs or other enzymes**

| CYPS | substrate | Inhibitor | Inducer*      |
|------|-----------|-----------|---------------|
| 1A2  | X         | X         | X             |
| 2B6  | X         | X         | Not evaluated |
| 2C9  | X         | Yes       | Yes           |
| 2C19 | X         | X         | Co-induced    |
| 2C8  | X         | Yes       | Co-induced    |
| 3A4  | X         | X         | Yes           |
| 3A5  | X         | X         | NA            |
| 2D6  | X         | X         | NA            |



## Of 4 NMEs with induction potential based on *in vitro* data

- HC Use in the Phase 3 Studies
  - HC use alone: 1/4
  - HC use was not permitted: 3/4
- Label Instruction on HC use
  - Specific instruction on whether HC cannot be used: 1/4
  - General information: 3/4
