# Supplementary material
Source: PubMed Central journal article supplement (PMC11022830)
Supplement: NIHMS1009393-supplement-Supplemental_material_11.pdf [file NIHMS1009393-supplement-Supplemental_material_11.pdf]

# Drug Interactions with Hormonal Contraception: A Clinician's Perspective

Roxanne Jamshidi, MD, MPH

Associate Professor, Department of Obstetrics and Gynecology  
George Washington University School of Medicine and Health Sciences

# Disclosures:

- Nexplanon trainer (Merck)

# My Background

- Generalist Ob/Gyn
  - George Washington University
  - Johns Hopkins University
- Family Planning
  - Fellowship in Family Planning at JHU
  - Assistant Fellowship Director at JHU

# In the clinic:

- Not concerned about drug interactions
  - Healthy patients
- Exceptions:
  - Anticonvulsants
  - Anti-retrovirals
  - Rifampin
  - Griseofulvin
  - St. John's Wort

# In the clinic:

- CDC's MEC
  - Quick
  - Easy to read
  - Evidence Based
- Other resources:
  - Micromedex
  - Up To Date/DynaMed
  - [www.hiv-druginteractions.org](http://www.hiv-druginteractions.org)
  - Aidsinfo.nih.gov



# Prescribing Information

- David Grimes: “throw it out”
  - Not always up to date or evidence based
  - More of a liability document
    - E.g. progestin only pill Micronor

## **WARNINGS**

Cigarette smoking increases the risk of serious cardiovascular disease. Women who use oral contraceptives should be strongly advised not to smoke.

ORTHO MICRONOR® does not contain estrogen and, therefore, this insert does not discuss the serious health risks that have been associated with the estrogen component of combined oral contraceptives (COCs). The healthcare professional is referred to the prescribing information of combined oral contraceptives for a discussion of those risks. The relationship between progestin-only oral contraceptives and these risks is not fully defined. The healthcare professional should remain alert to the earliest manifestation of symptoms of any serious disease and discontinue oral contraceptive therapy when appropriate.

# Colleagues:

- Generally do not think about interactions with few exceptions
  - Medications previously mentioned
  - Patient's on uncommon or unfamiliar medications
- Resources:
  - MEC
  - Up To Date
  - Google search
  - Product web site
  - Prescribing Information
- Caveat

# Missing information?

- Vaginal products with vaginal contraception
- Common medications in reproductive health-aged women
  - SSRI/antipsychotics
  - Thyroxine
  - ADHD medication
  - Migraine medications
  - Accutane
  - Beta-blockers
- Patient's with uncommon co-morbidities or medications
  - Organ transplant
  - chemotherapy



# The Future

- EMR – interactions pop-up
  - Relies on good information at baseline
  - Adequate IT/EMR resources
