# Supplementary material
Source: PubMed Central journal article supplement (PMC11022830)
Supplement: NIHMS1009393-supplement-Supplemental_material_12.pdf [file NIHMS1009393-supplement-Supplemental_material_12.pdf]

# Medical Cognition Laboratory

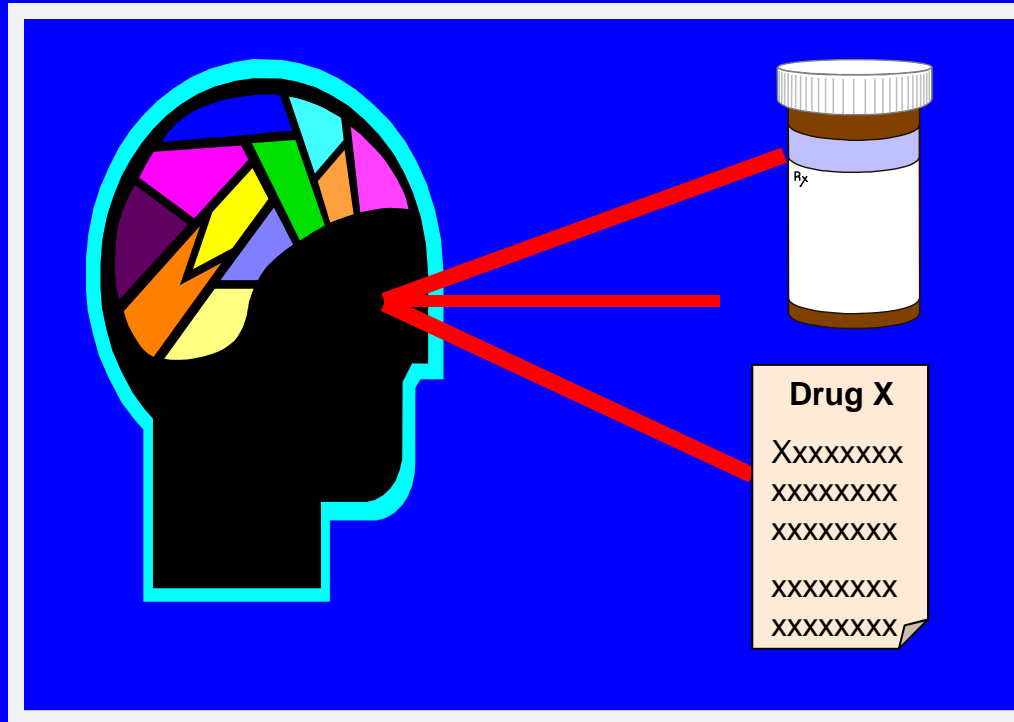

Rx

© RuthDay

Comprehension, memory, and use  
of drug information.

# Basic Approach

```
graph TD; A[Basic Approach] --> B[Cognitive Analyses]; A --> C[Enhanced Displays]; A --> D[Cognitive Experiments];
```

**Cognitive  
Analyses**

**Enhanced  
Displays**

**Cognitive  
Experiments**

# Basic Approach

**Cognitive  
Analyses**

**Enhanced  
Displays**

**Cognitive  
Experiments**

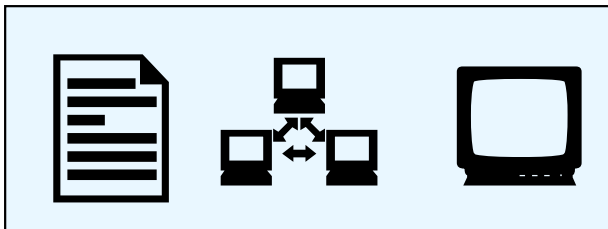

- Obtain quantitative measures
- Calculate “cognitive accessibility”

# Basic Approach

## Cognitive Analyses

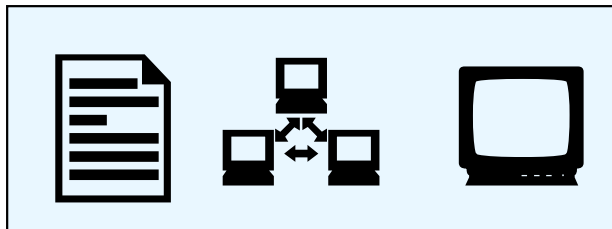

- Obtain quantitative measures
- Calculate “cognitive accessibility”

## Enhanced Displays

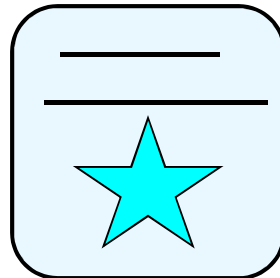

- Same info
- Based on cognitive principles

## Cognitive Experiments

# Basic Approach

## Cognitive Analyses

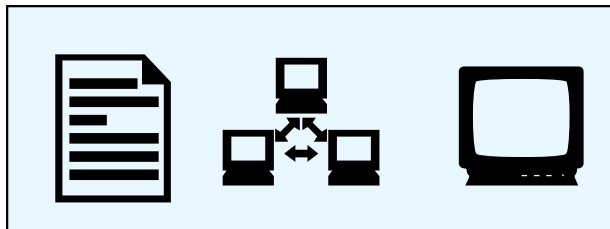

- Obtain quantitative measures
- Calculate “cognitive accessibility”

## Enhanced Displays



- Same info
- Based on cognitive principles

## Cognitive Experiments

Test effects on:

- Attention
- Comprehension
- Memory
- Problem Solving
- Decision Making
- Behavior

# Basic Approach

## Cognitive Analyses



- Obtain quantitative measures
- Calculate “cognitive accessibility”

## Enhanced Displays



- Same info
- Based on cognitive principles

## Cognitive Experiments

Test effects on:

- Attention
- Comprehension
- Memory
- Problem Solving
- Decision Making
- Behavior

**Health Outcomes**

Ruth Day

# Basic Approach

**Today**

## Cognitive Analyses

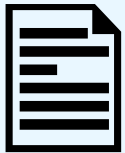

**DDI for HC**

- Labeling for:
  - sample HC's
  - sample DI drugs  
(antivirals)



# Basic Approach

**Today**

## Cognitive Analyses

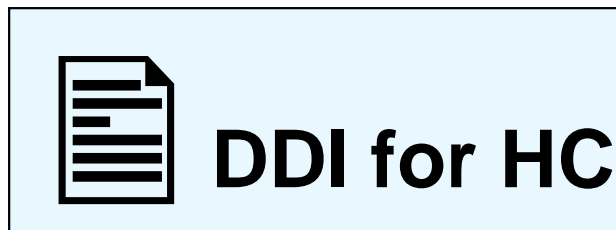

- Labeling for:
  - sample HC's
  - sample DI drugs (antivirals)

## Enhanced Displays



- Key info
- Based on cognitive principles

# Basic Approach

**Today**

## Cognitive Analyses

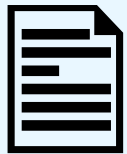

**DDI for HC**

- Labeling for:
  - sample HC's
  - sample DI drugs (antivirals)

## Enhanced Displays



- Key info
- Based on cognitive principles

## Cognitive Experiments

Test effects on:

- Attention
- Comprehension
- Memory
- Problem Solving
- Decision Making
- Behavior

**Health Outcomes**

Ruth Day

# DDI Labeling

- Drug Interactions (Section 7)
- Clinical Pharmacology (Section 12)
- Dosage and Administration (Section 2)
  
- Patient Counseling (Section 17)

# Cognitive Accessibility

# Cognitive Accessibility

The ease with which

# Cognitive Accessibility

The ease with which

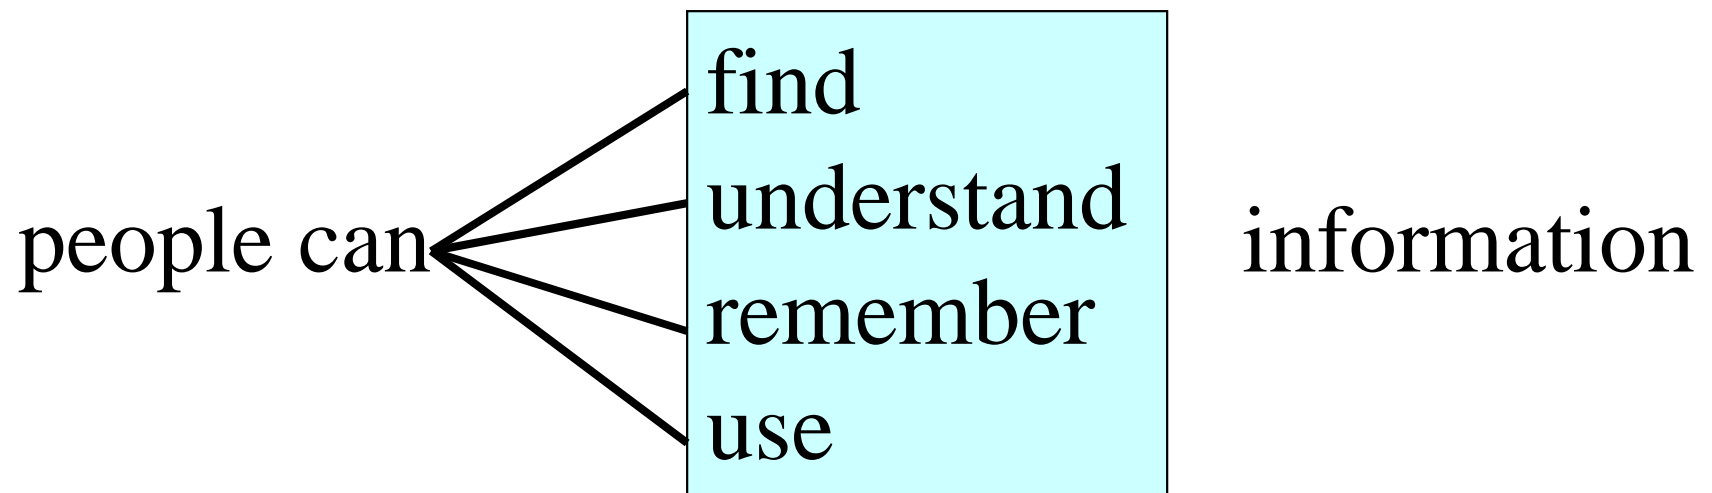

# Cognitive Accessibility

The ease with which

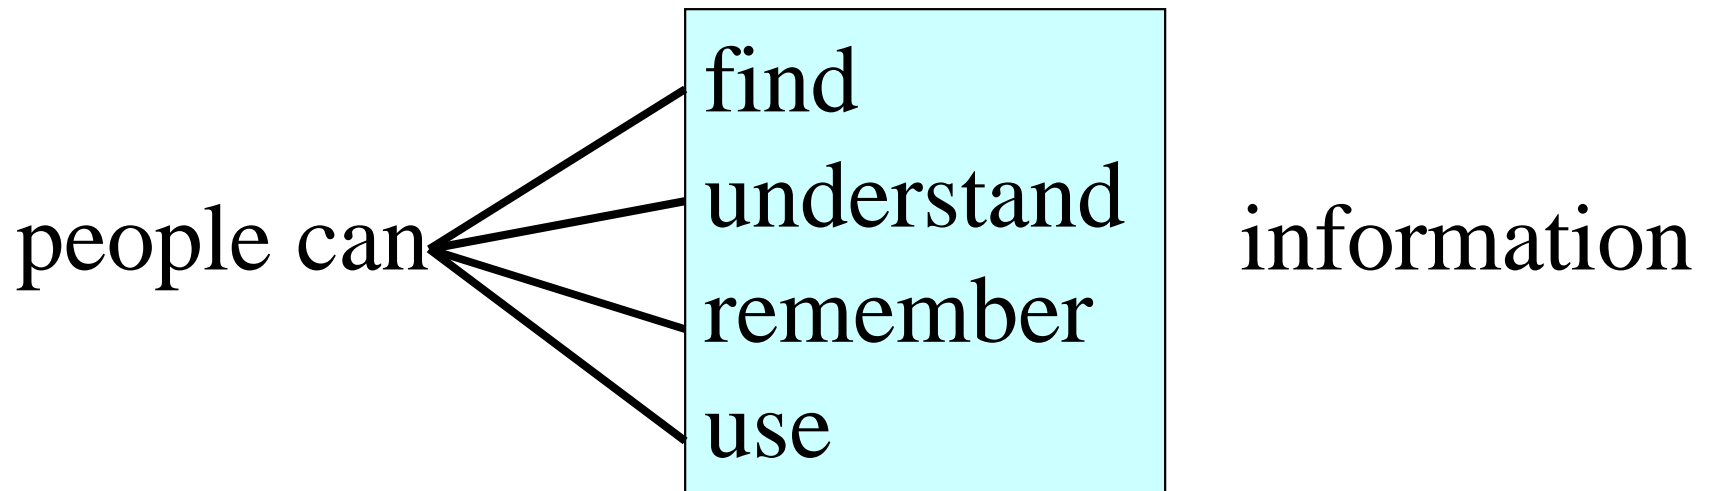

in a safe and effective manner.

# Cognitive **IN**-Accessibility

The ease with which

people can

- find
- understand
- remember
- use

information

in a safe and effective manner.



# Time Zone

**AFTER**

- Review DDI data
- Determine clinical recommendations
- Decide what to include
- Draft labeling

# Time Zone

## AFTER

- Review DDI data
- Determine clinical recommendations
- Decide what to include
- Draft labeling

## THEN

- How to Say it
- How to Display it

# Time Zone

## AFTER

- Review DDI data
- Determine clinical recommendations
- Decide what to include
- Draft labeling

## THEN

- How to Say it
- How to Display it

## AND

- for whom
- for what tasks

# Basic Problem

Providers

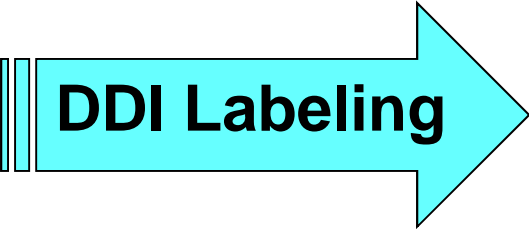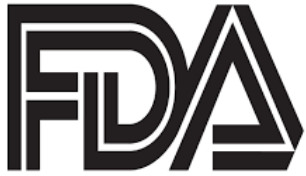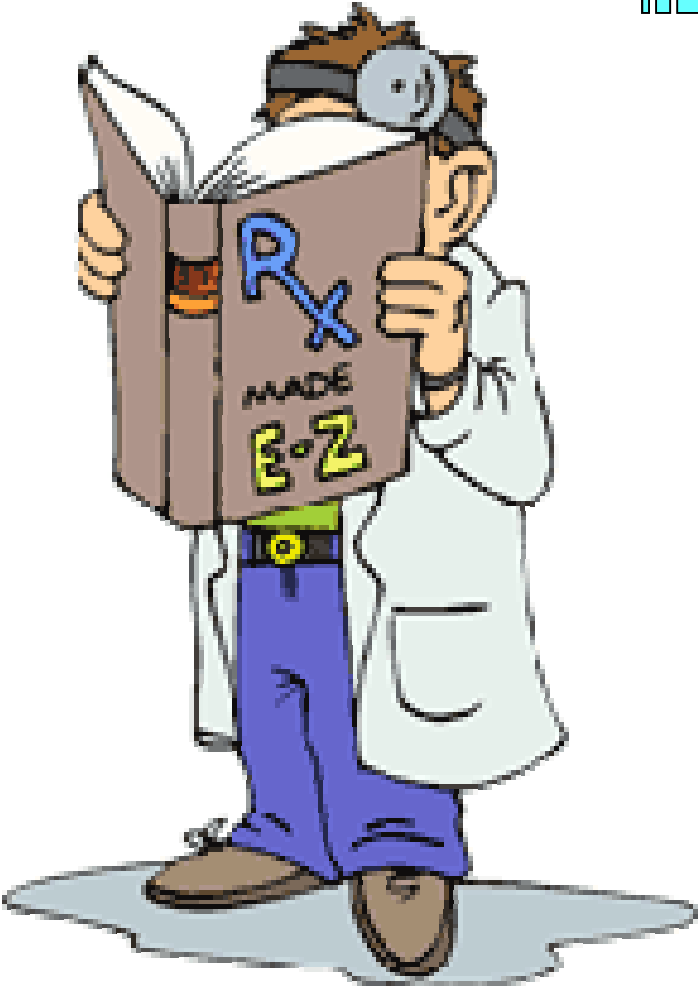

# Basic Problem

Providers

DDI Labeling

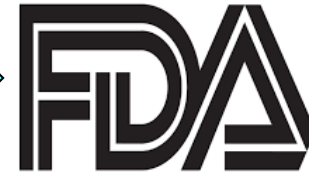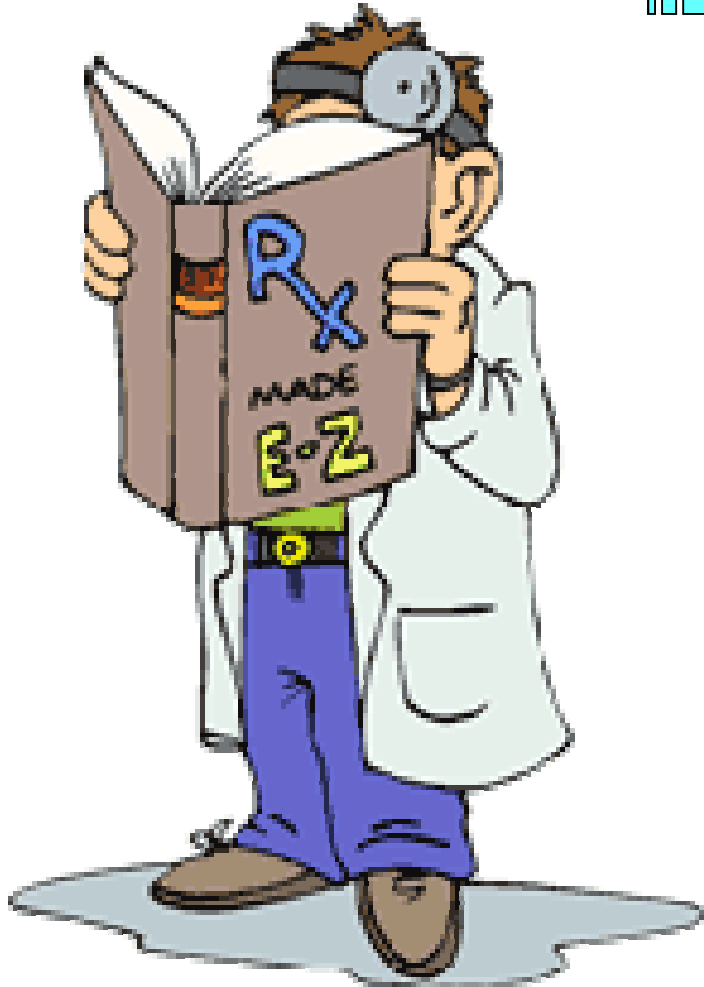

- Don't read labeling
- Too much information
- Not clinically friendly

# Basic Problem

Providers

DDI Labeling

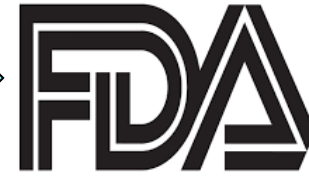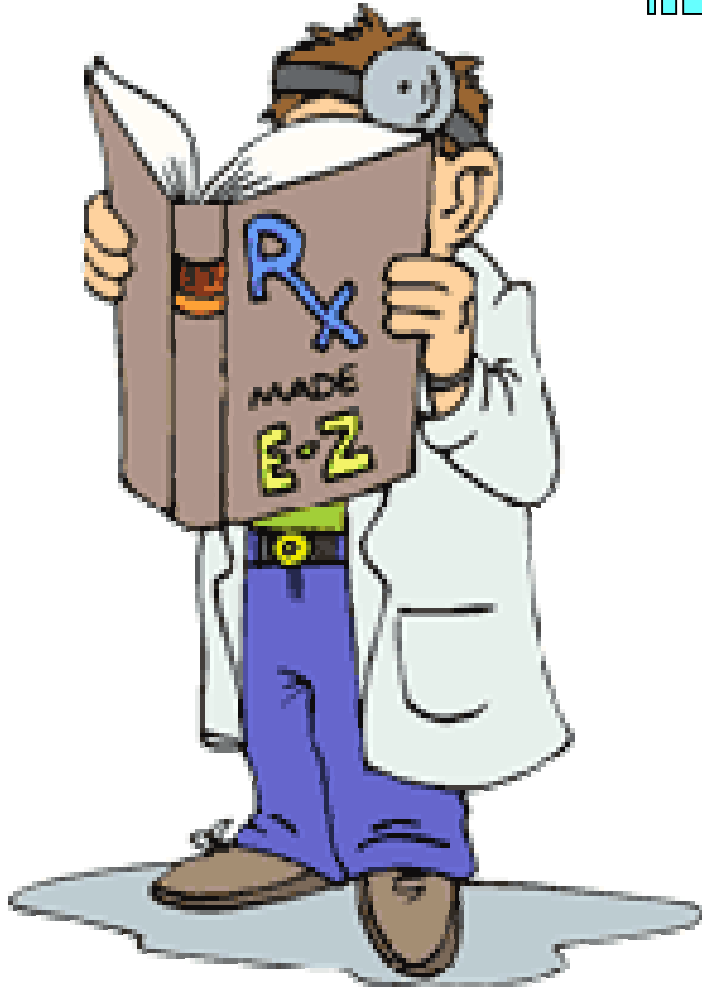

- Don't read labeling
- Too much information
- Not clinically friendly

**Cognitive  
accessibility ?**

# DDI Information

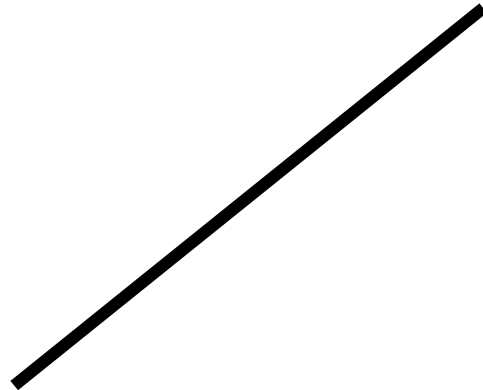

**Physically  
present**

# DDI Information

**Physically  
present**

**Functionally  
absent**



# Basic Problem

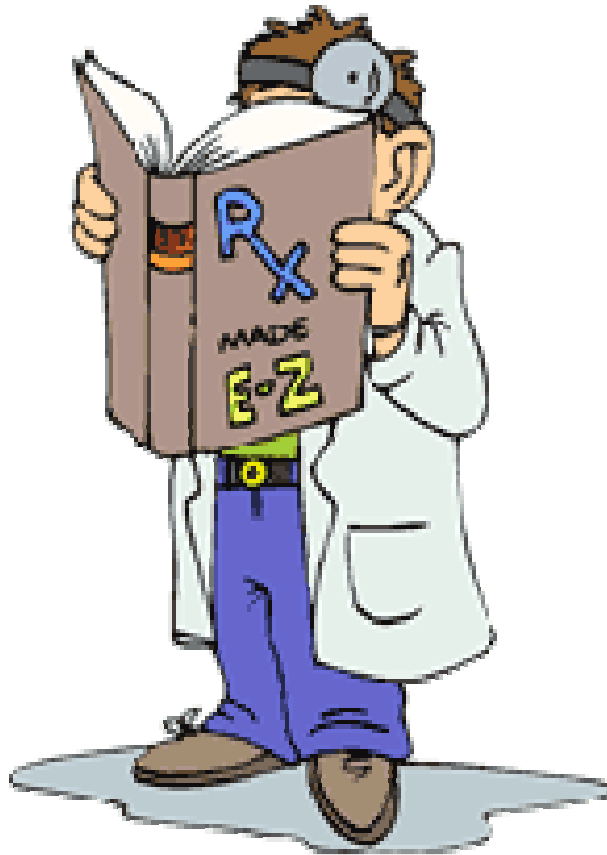

## Questions

--What do they want?

## Drug List

Drug-A  
Drug-B  
Drug-C  
Drug-D  
Drug-E

# Basic Problem



## Questions

- What do they want?
- What do they **need**?
- When do they need it?

## Drug List

Drug-A  
Drug-B  
Drug-C  
Drug-D  
Drug-E

# Basic Problem



## Questions

- What do they want?
- What do they **need**?
- When do they need it?
- Can they get along without (some of) it?

## Drug List

Drug-A  
Drug-B  
Drug-C  
Drug-D  
Drug-E

# Basic Problem

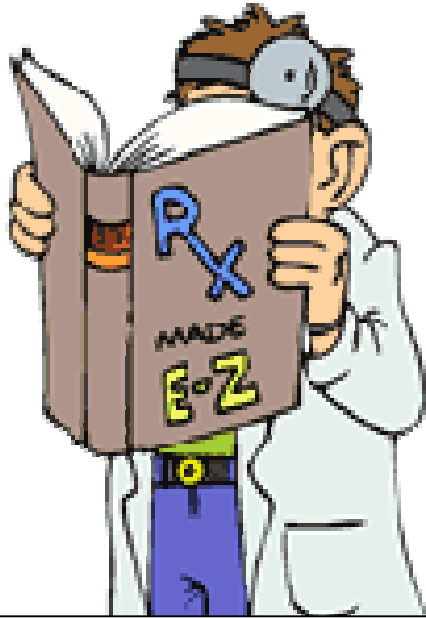

## Questions

- What do they want?
- What do they **need**?
- When do they need it?
- Can they get along without (some of) it?

## Drug List

Drug-A  
Drug-B  
Drug-C  
Drug-D  
Drug-E

## How to get HCP's to

- Look at the labeling
- Engage them
- Help them find, understand, remember, & use the info

# Basic Problem

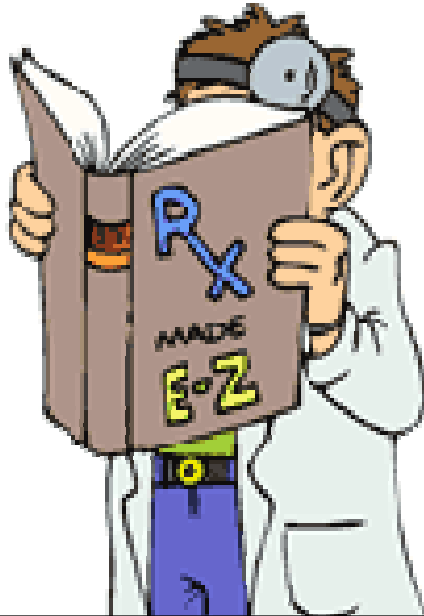

## Questions

- What do they want?
- What do they **need**?
- When do they need it?
- Can they get along without (some of) it?

## Drug List

Drug-A  
Drug-B  
Drug-C  
Drug-D  
Drug-E

## How to get HCP's to

- Look at the labeling
- Engage them
- Help them find, understand, remember, & use the info

## Real-world situations

- Careful read
- Skim
- Search & find
- Remember
- Use

# Cognitive Tasks

# Cognitive Tasks

| <b>Task</b>                | <b>Time Needed</b> | <b>Label Support?</b>                                          |
|----------------------------|--------------------|----------------------------------------------------------------|
| Read for general knowledge | A lot              | Content = Good<br>Cognitive Accessibility =<br>Could be better |

# Cognitive Tasks

| <b>Task</b>                | <b>Time Needed</b>   | <b>Label Support?</b>                                          |
|----------------------------|----------------------|----------------------------------------------------------------|
| Read for general knowledge | A lot                | Content = Good<br>Cognitive Accessibility =<br>Could be better |
| Solve a problem            | Moderate<br>to a lot | Content = Good<br>Cognitive Accessibility =<br>Variable        |



# Cognitive Tasks

| <b>Task</b>                            | <b>Time Needed</b>   | <b>Label Support?</b>                                          |
|----------------------------------------|----------------------|----------------------------------------------------------------|
| Read for general knowledge             | A lot                | Content = Good<br>Cognitive Accessibility =<br>Could be better |
| Solve a problem                        | Moderate<br>to a lot | Content = Good<br>Cognitive Accessibility =<br>Variable        |
| Find whether a specific drug is listed | Too much             | Could be better<br>Could → errors                              |

# Cognitive Tasks

| <b>Task</b>                            | <b>Time Needed</b> | <b>Label Support?</b>                                          |
|----------------------------------------|--------------------|----------------------------------------------------------------|
| Read for general knowledge             | A lot              | Content = Good<br>Cognitive Accessibility =<br>Could be better |
| Solve a problem                        | Moderate to a lot  | Content = Good<br>Cognitive Accessibility =<br>Variable        |
| Find whether a specific drug is listed | Too much           | Could be better<br>Could → errors                              |
| Remember                               | Too much           | Poor                                                           |
| (etc.)                                 |                    |                                                                |

# Cognitive Tasks

| Task                                   | Time Needed       | Label Support?                                                 |
|----------------------------------------|-------------------|----------------------------------------------------------------|
| Read for general knowledge             | A lot             | Content = Good<br>Cognitive Accessibility =<br>Could be better |
| Solve a problem                        | Moderate to a lot | Content = Good<br>Cognitive Accessibility =<br>Variable        |
| Find whether a specific drug is listed | Too much          | Could be better<br>Could → errors                              |
| Remember                               | Too much          | Poor                                                           |
| (etc.)                                 |                   |                                                                |

# Cognitive Tasks

| Task                                   | Time Needed | Label Support?                                                 |
|----------------------------------------|-------------|----------------------------------------------------------------|
| Read for general knowledge             | A lot       | Content = Good<br>Cognitive Accessibility =<br>Could be better |
| Solve a problem                        | Mod<br>to a |                                                                |
| Find whether a specific drug is listed | Too         |                                                                |
| Remember                               | Too         |                                                                |
| (etc.)                                 |             |                                                                |

## How to

- reduce time
- reduce effort
- increase comprehension
- increase memory
- facilitate problem solving
- facilitate decision making

# Alternative Displays

# Alternative Displays

## Text

### 7 DRUG INTERACTIONS

Consult the labeling of all concurrently-used drugs to obtain further information about interactions with hormonal contraceptives or the potential for enzyme alterations.

#### 7.1 Effects of Other Drugs on Combined Oral Contraceptives

**Substances diminishing the efficacy of COCs:** Drugs or herbal products that induce certain enzymes, including cytochrome P450 3A4 (CYP3A4), may decrease the effectiveness of COCs or increase breakthrough bleeding. Some drugs or herbal products that may decrease the effectiveness of hormonal contraceptives include phenytoin, barbiturates, carbamazepine, bosentan, felbamate, griseofulvin, oxcarbazepine, rifampin, topiramate and products containing St. John's wort. Interactions between oral contraceptives and other drugs may lead to breakthrough bleeding and/or contraceptive failure. Counsel women to use an alternative method of contraception or a back-up method when enzyme inducers are used with COCs, and to continue back-up contraception for 28 days after discontinuing the enzyme inducer to ensure contraceptive reliability.

**Substances increasing the plasma concentrations of COCs:** Co-administration of stavudine and certain COCs containing EE increases AUC values for EE by approximately 20%. Ascorbic acid and saquinavir may increase plasma EE concentrations, possibly by inhibition of conjugation.

Concomitant administration of moderate or strong CYP3A4 inhibitors such as azole antifungals (e.g., itraconazole, voriconazole, fluconazole), verapamil, macrolides (e.g., clarithromycin, erythromycin), diltiazem, and grapefruit juice can increase the plasma concentrations of the estrogen or the progestin or both. In a clinical drug-drug interaction study conducted in premenopausal women, once daily co-administration of DRSP 3 mg/EE 0.02 mg containing tablet with strong CYP3A4 inhibitor, ketoconazole 200 mg twice daily for 10 days resulted in a moderate increase of DRSP systemic exposure. The exposure of EE was increased mildly [see *Warnings and Precautions (5.3)* and *Clinical Pharmacology (12.3)*].

**Human immunodeficiency virus (HIV), Hepatitis C virus (HCV) protease inhibitors and non-nucleoside reverse transcriptase inhibitors:** Significant changes (increase or decrease) in the plasma concentrations of estrogen and progestin

## Table

| Epidemiologic Study <sup>a</sup>                                              | Comparator Product                          | Risk Ratios (95% CI)                    |
|-------------------------------------------------------------------------------|---------------------------------------------|-----------------------------------------|
| i3 Ingenix NGM Study in Ingenix Research Datamart <sup>1,6,7,8</sup>          | NGM/35 mcg EE <sup>B</sup>                  | 2.2 <sup>C</sup> (1.2-4.0) <sup>D</sup> |
| BCDSP <sup>2</sup><br>NGM Study in Pharmetrics database <sup>2,3,5</sup>      | NGM/35 mcg EE                               | 1.2 (0.9-1.8) <sup>F</sup>              |
| BCDSP <sup>2</sup> LNG Study in Pharmetrics database <sup>4</sup>             | LNG <sup>G</sup> /30 mcg EE                 | 2.0 (0.9-4.1) <sup>H</sup>              |
| BCDSP <sup>2</sup> LNG Study in MarketScan database <sup>4</sup>              | LNG/30 mcg EE                               | 1.3 (0.8-2.1) <sup>I</sup>              |
| FDA-funded Study in Kaiser Permanente and Medicaid databases <sup>7,8,9</sup> | "All progestins <sup>L</sup> "/20-35 mcg EE | 1.4 (0.9-2.0)                           |
|                                                                               | LNG/30 mcg EE                               | 1.2 (0.8-1.9)                           |

## Figure

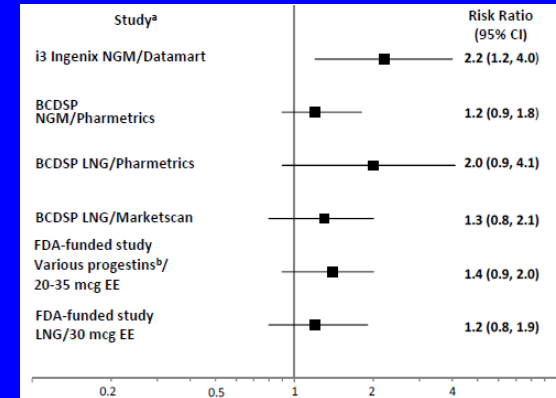

# Alternative Displays

## Text

**7 DRUG INTERACTIONS**

Consult the labeling of all concurrently-used drugs to obtain further information about interactions with hormonal contraceptives or the potential for enzyme alterations.

**7.1 Effects of Other Drugs on Combined Oral Contraceptives**

*Substances diminishing the efficacy of COCs:* Drugs or herbal products that induce certain enzymes, including cytochrome P450 3A4 (CYP3A4), may decrease the effectiveness of COCs or increase breakthrough bleeding. Some drugs or herbal products that may decrease the effectiveness of hormonal contraceptives include phenytoin, barbiturates, carbamazepine, bosentan, felbamate, griseofulvin, oxcarbazepine, rifampin, topiramate and products containing St. John's wort. Interactions between oral contraceptives and other drugs may lead to breakthrough bleeding and/or contraceptive failure. Counsel women to use an alternative method of contraception or a back-up method when enzyme inducers are used with COCs, and to continue back-up contraception for 28 days after discontinuing the enzyme inducer to ensure contraceptive reliability.

*Substances increasing the plasma concentrations of COCs:* Co-administration of atorvastatin and certain COCs containing EE increase AUC values for EE by approximately 20%. Ascorbic acid and saxagliptin may increase plasma EE concentrations, possibly by inhibition of conjugation.

Concomitant administration of moderate or strong CYP3A4 inhibitors such as azole antifungals (e.g., itraconazole, isavuconazole, voriconazole, fluconazole), verapamil, macrolides (e.g., clarithromycin, erythromycin), diltiazem, and grapefruit juice can increase the plasma concentrations of the estrogen or the progestin or both. In a clinical drug-drug interaction study conducted in premenopausal women, once daily co-administration of DRSP 3 mg/EE 0.02 mg containing tablet with strong CYP3A4 inhibitor, ketoconazole 200 mg twice daily for 10 days resulted in a moderate increase of DRSP systemic exposure. The exposure of EE was increased mildly [see Warnings and Precautions (5.3) and Clinical Pharmacology (12.3)].

*Human immunodeficiency virus (HIV), Hepatitis C virus (HCV) protease inhibitors and non-nucleoside reverse transcriptase inhibitors:* Significant changes (increase or decrease) in the plasma concentrations of estrogen and progestin

## Table

| Epidemiologic Study <sup>a</sup>                                                | Comparator Product                          | Risk Ratios (95% CI)                    |
|---------------------------------------------------------------------------------|---------------------------------------------|-----------------------------------------|
| i3 Ingenix NGM Study in Ingenix Research Datamart <sup>1,6,7,8</sup>            | NGM/35 mcg EE <sup>B</sup>                  | 2.2 <sup>C</sup> (1.2-4.0) <sup>D</sup> |
| BCDSP <sup>2</sup> NGM Study in Pharmetrics database <sup>3,3,5</sup>           | NGM/35 mcg EE                               | 1.2 (0.9-1.8) <sup>F</sup>              |
| BCDSP <sup>2</sup> LNG Study in Pharmetrics database <sup>4</sup>               | LNG <sup>G</sup> /30 mcg EE                 | 2.0 (0.9-4.1) <sup>H</sup>              |
| BCDSP <sup>2</sup> LNG Study in MarketScan database <sup>5</sup>                | LNG/30 mcg EE                               | 1.3 (0.8-2.1) <sup>I</sup>              |
| FDA-funded Study in Kaiser Permanente and Medicaid databases <sup>7, K, 9</sup> | "All progestins" <sup>L</sup> /20-35 mcg EE | 1.4 (0.9-2.0)                           |
|                                                                                 | LNG/ 30 mcg EE                              | 1.2 (0.8-1.9)                           |

## Figure

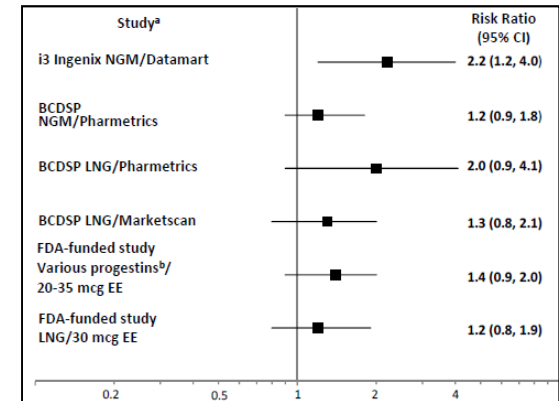

# Which is best?

# Alternative Displays

## Text

**7 DRUG INTERACTIONS**

Consult the labeling of all concurrently-used drugs to obtain further information about interactions with hormonal contraceptives or the potential for enzyme alterations.

**7.1 Effects of Other Drugs on Combined Oral Contraceptives**

*Substances diminishing the efficacy of COCs:* Drugs or herbal products that induce certain enzymes, including cytochrome P450 3A4 (CYP3A4), may decrease the effectiveness of COCs or increase breakthrough bleeding. Some drugs or herbal products that may decrease the effectiveness of hormonal contraceptives include phenytoin, barbiturates, carbamazepine, bosentan, felbamate, griseofulvin, oxcarbazepine, rifampin, topiramate and products containing St. John's wort. Interactions between oral contraceptives and other drugs may lead to breakthrough bleeding and/or contraceptive failure. Counsel women to use an alternative method of contraception or a back-up method when enzyme inducers are used with COCs, and to continue back-up contraception for 28 days after discontinuing the enzyme inducer to ensure contraceptive reliability.

*Substances increasing the plasma concentrations of COCs:* Co-administration of atorvastatin and certain COCs containing EE increase AUC values for EE by approximately 20%. Ascorbic acid and saxagliptin may increase plasma EE concentrations, possibly by inhibition of conjugation.

Concomitant administration of moderate or strong CYP3A4 inhibitors such as azole antifungals (e.g., itraconazole, voriconazole, fluconazole), macrolides (e.g., clarithromycin, erythromycin), diltiazem, and grapefruit juice can increase the plasma concentrations of the estrogen or the progestin or both. In a clinical drug-drug interaction study conducted in premenopausal women, once daily co-administration of DRSP 3 mg/EE 0.02 mg containing tablet with strong CYP3A4 inhibitor, ketoconazole 200 mg twice daily for 10 days resulted in a moderate increase of DRSP systemic exposure. The exposure of EE was increased mildly [see Warnings and Precautions (5.2) and Clinical Pharmacology (12.3)].

*Human immunodeficiency virus (HIV), Hepatitis C virus (HCV) protease inhibitors and non-nucleoside reverse transcriptase inhibitors:* Significant changes (increase or decrease) in the plasma concentrations of estrogen and progestin

## Table

| Epidemiologic Study <sup>a</sup>                                          | Comparator Product                       | Risk Ratios (95% CI)                    |
|---------------------------------------------------------------------------|------------------------------------------|-----------------------------------------|
| i3 Ingenix NGM Study in Ingenix Research Datamart <sup>1,6,7,8</sup>      | NGM/35 mcg EE <sup>B</sup>               | 2.2 <sup>c</sup> (1.2-4.0) <sup>D</sup> |
| BCDSP <sup>2</sup>                                                        |                                          |                                         |
| NGM Study in Pharmetrics database <sup>2,3,5</sup>                        | NGM/35 mcg EE                            | 1.2 (0.9-1.8) <sup>F</sup>              |
| BCDSP <sup>2</sup> LNG Study in Pharmetrics database <sup>4</sup>         | LNG <sup>G</sup> /30 mcg EE              | 2.0 (0.9-4.1) <sup>H</sup>              |
| BCDSP <sup>2</sup> LNG Study in MarketScan database <sup>4</sup>          | LNG/30 mcg EE                            | 1.3 (0.8-2.1) <sup>I</sup>              |
| FDA-funded Study in Kaiser Permanente and Me databases <sup>7, K, 9</sup> | "All progestins" <sup>L</sup> /20-35 mcg | 1.4 (0.9-2.0)                           |

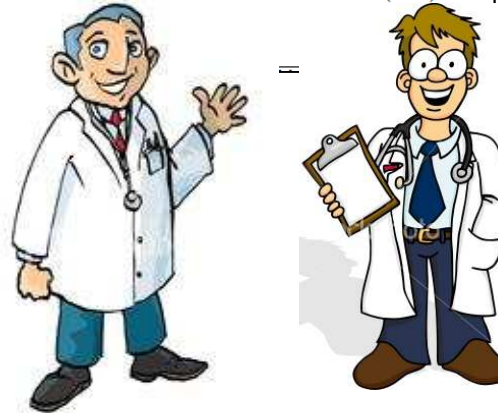

## Figure

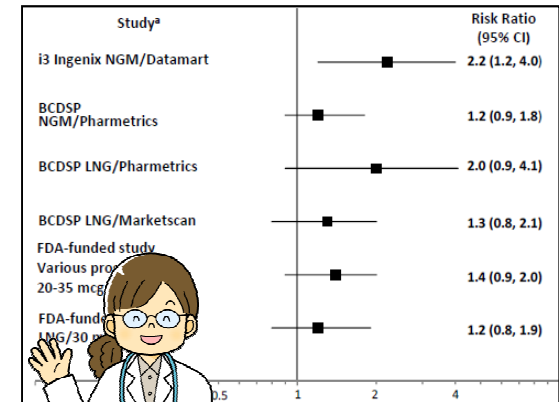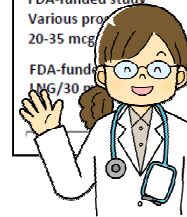

Which is best?

--for whom?



# Alternative Displays

## Text

**7 DRUG INTERACTIONS**

Consult the labeling of all concurrently-used drugs to obtain further information about interactions with hormonal contraceptives or the potential for enzyme alterations.

**7.1 Effects of Other Drugs on Combined Oral Contraceptives**

*Substances diminishing the efficacy of COCs:* Drugs or herbal products that induce certain enzymes, including cytochrome P450 3A4 (CYP3A4), may decrease the effectiveness of COCs or increase breakthrough bleeding. Some drugs or herbal products that may decrease the effectiveness of hormonal contraceptives include phenytoin, barbiturates, carbamazepine, bosentan, felbamate, griseofulvin, oxcarbazepine, rifampin, topiramate and products containing St. John's wort. Interactions between oral contraceptives and other drugs may lead to breakthrough bleeding and/or contraceptive failure. Counsel women to use an alternative method of contraception or a back-up method when enzyme inducers are used with COCs, and to continue back-up contraception for 28 days after discontinuing the enzyme inducer to ensure contraceptive reliability.

*Substances increasing the plasma concentrations of COCs:* Co-administration of stavudine and certain COCs containing EE increase AUC values for EE by approximately 20%. Ascorbic acid and oxcarbazepine may increase plasma EE concentrations, possibly by inhibition of conjugation.

Concomitant administration of moderate or strong CYP3A4 inhibitors such as azole antifungals (e.g., itraconazole, voriconazole, fluconazole), macrolides (e.g., clarithromycin, erythromycin), diltiazem, and grapefruit juice can increase the plasma concentrations of the estrogen or the progestin or both. In a clinical drug-drug interaction study conducted in premenopausal women, once daily co-administration of DRSP 3 mg/EE 0.02 mg containing tablet with strong CYP3A4 inhibitor, ketoconazole 200 mg twice daily for 10 days resulted in a moderate increase of DRSP systemic exposure. The exposure of EE was increased mildly [see Warnings and Precautions (5.2) and Clinical Pharmacology (12.3)].

*Human immunodeficiency virus (HIV), Hepatitis C virus (HCV) protease inhibitors and non-nucleoside reverse transcriptase inhibitors:* Significant changes (increase or decrease) in the plasma concentrations of estrogen and progestin

## Table

| Epidemiologic Study <sup>a</sup>                                                | Comparator Product                          | Risk Ratios (95% CI)                    |
|---------------------------------------------------------------------------------|---------------------------------------------|-----------------------------------------|
| I3 Ingenix NGM Study in Ingenix Research Datamart <sup>1,6,7,8</sup>            | NGM/35 mcg EE <sup>B</sup>                  | 2.2 <sup>C</sup> (1.2-4.0) <sup>D</sup> |
| BCDSP <sup>2</sup>                                                              |                                             |                                         |
| NGM Study in Pharmetrics database <sup>2,3,5</sup>                              | NGM/35 mcg EE                               | 1.2 (0.9-1.8) <sup>F</sup>              |
| BCDSP <sup>2</sup> LNG Study in Pharmetrics database <sup>4</sup>               | LNG <sup>G</sup> /30 mcg EE                 | 2.0 (0.9-4.1) <sup>H</sup>              |
| BCDSP <sup>2</sup> LNG Study in MarketScan database <sup>4</sup>                | LNG/30 mcg EE                               | 1.3 (0.8-2.1) <sup>I</sup>              |
| FDA-funded Study in Kaiser Permanente and Medicaid databases <sup>2, K, 9</sup> | "All progestins" <sup>L</sup> /20-35 mcg EE | 1.4 (0.9-2.0)                           |
|                                                                                 | LNG/30 mcg EE                               | 1.2 (0.8-1.9)                           |

## Figure

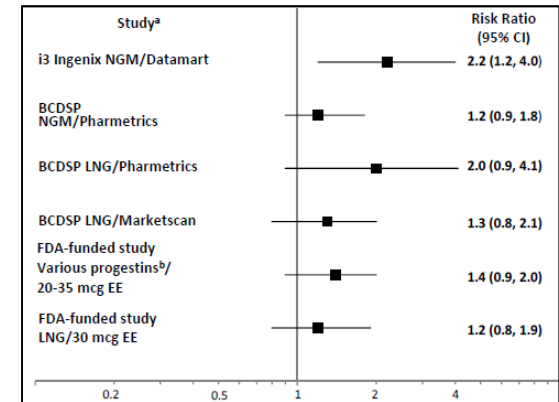

# Which is best?

## --for whom?

## --what situation?

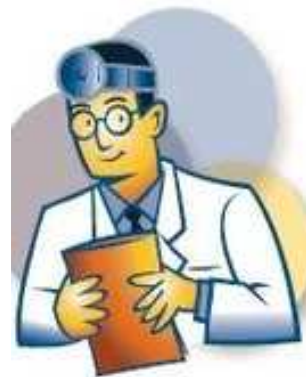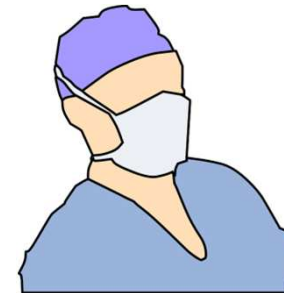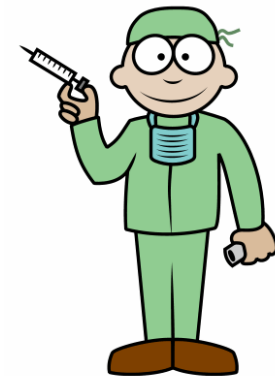

# Alternative Displays

## Text

**7 DRUG INTERACTIONS**

Consult the labeling of all concurrently-used drugs to obtain further information about interactions with hormonal contraceptives or the potential for enzyme alterations.

**7.1 Effects of Other Drugs on Combined Oral Contraceptives**

*Substances diminishing the efficacy of COCs:* Drugs or herbal products that induce certain enzymes, including cytochrome P450 3A4 (CYP3A4), may decrease the effectiveness of COCs or increase breakthrough bleeding. Some drugs or herbal products that may decrease the effectiveness of hormonal contraceptives include phenytoin, barbiturates, carbamazepine, bosentan, felbamate, griseofulvin, oxcarbazepine, rifampin, topiramate and products containing St. John's wort. Interactions between oral contraceptives and other drugs may lead to breakthrough bleeding and/or contraceptive failure. Counsel women to use an alternative method of contraception or a back-up method when enzyme inducers are used with COCs, and to continue back-up contraception for 28 days after discontinuing the enzyme inducer to ensure contraceptive reliability.

*Substances increasing the plasma concentrations of COCs:* Co-administration of stavudine and certain COCs containing EE increase AUC values for EE by approximately 20%. Ascorbic acid and saxagliptin may increase plasma EE concentrations, possibly by inhibition of conjugation.

Concomitant administration of moderate or strong CYP3A4 inhibitors such as azole antifungals (e.g., itraconazole, voriconazole, fluconazole), macrolides (e.g., clarithromycin, erythromycin), diltiazem, and grapefruit juice can increase the plasma concentrations of the estrogen or the progestin or both. In a clinical drug-drug interaction study conducted in premenopausal women, once daily co-administration of DRESP 3 mg/EE 0.02 mg containing tablet with strong CYP3A4 inhibitor, ketoconazole 200 mg twice daily for 10 days resulted in a moderate increase of DRESP systemic exposure. The exposure of EE was increased mildly [see *Warnings and Precautions (5.2)* and *Clinical Pharmacology (12.3)*].

*Human immunodeficiency virus (HIV), Hepatitis C virus (HCV) protease inhibitors and non-nucleoside reverse transcriptase inhibitors:* Significant changes (increase or decrease) in the plasma concentrations of estrogen and progestin

## Table

| Epidemiologic Study <sup>a</sup>                                                | Comparator Product                          | Risk Ratios (95% CI)                    |
|---------------------------------------------------------------------------------|---------------------------------------------|-----------------------------------------|
| i3 Ingenix NGM Study in Ingenix Research Datamart <sup>1,6,7,8</sup>            | NGM/35 mcg EE <sup>B</sup>                  | 2.2 <sup>C</sup> (1.2-4.0) <sup>D</sup> |
| BCDSP <sup>2</sup>                                                              |                                             |                                         |
| NGM Study in Pharmetrics database <sup>2,3,5</sup>                              | NGM/35 mcg EE                               | 1.2 (0.9-1.8) <sup>F</sup>              |
| BCDSP <sup>2</sup> LNG Study in Pharmetrics database <sup>4</sup>               | LNG <sup>G</sup> /30 mcg EE                 | 2.0 (0.9-4.1) <sup>H</sup>              |
| BCDSP <sup>2</sup> LNG Study in MarketScan database <sup>4</sup>                | LNG/30 mcg EE                               | 1.3 (0.8-2.1) <sup>I</sup>              |
| FDA-funded Study in Kaiser Permanente and Medicaid databases <sup>2, K, 9</sup> | "All progestins" <sup>L</sup> /20-35 mcg EE | 1.4 (0.9-2.0)                           |
|                                                                                 | LNG/ 30 mcg EE                              | 1.2 (0.8-1.9)                           |

## Figure



Which is best?

--for whom?

--what situation?

--what task?

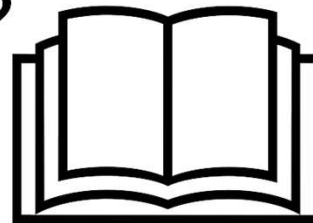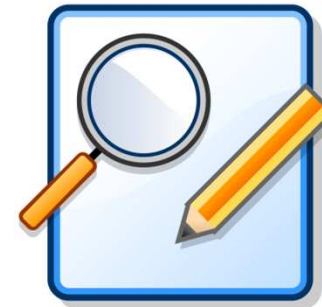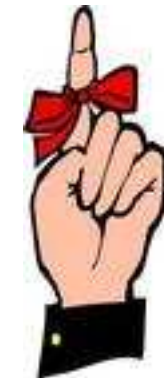

Ruth Day

# Alternative Displays

## Tables

| Epidemiologic Study <sup>A</sup>                                              | Comparator Product                          | Risk Ratios (95% CI)                    |
|-------------------------------------------------------------------------------|---------------------------------------------|-----------------------------------------|
| 13 Ingenix NGM Study in Ingenix Research Datamart <sup>1,6,7,8</sup>          | NGM/35 mcg EE <sup>B</sup>                  | 2.2 <sup>C</sup> (1.2-4.0) <sup>D</sup> |
| BCDSP <sup>E</sup><br>NGM Study in Pharmetrics database <sup>2,3,5</sup>      | NGM/35 mcg EE                               | 1.2 (0.9-1.8) <sup>F</sup>              |
| BCDSP <sup>E</sup> LNG Study in Pharmetrics database <sup>4</sup>             | LNG <sup>G</sup> /30 mcg EE                 | 2.0 (0.9-4.1) <sup>H</sup>              |
| BCDSP <sup>E</sup> LNG Study in MarketScan database <sup>6</sup>              | LNG/30 mcg EE                               | 1.3 (0.8-2.1) <sup>I</sup>              |
| FDA-funded Study in Kaiser Permanente and Medicaid databases <sup>7,8,9</sup> | "All progestins" <sup>L</sup> /20-35 mcg EE | 1.4 (0.9-2.0)                           |
|                                                                               | LNG/ 30 mcg EE                              | 1.2 (0.8-1.9)                           |

**Viberzi  
(IBS-D)**

**Table 2: Established and Other Potentially Clinically Relevant Interactions Affecting VIBERZI**

| <b>OATP1B1 Inhibitors</b>            |                                                                                                                                                                                                                                                                                                                                                       |
|--------------------------------------|-------------------------------------------------------------------------------------------------------------------------------------------------------------------------------------------------------------------------------------------------------------------------------------------------------------------------------------------------------|
| <i>Clinical Impact:</i>              | Increased exposure to eluxadoline when coadministered with cyclosporine, gemfibrozil, and antiretrovirals (atazanavir, lopinavir, saquinavir, tipranavir), rifampin, eltrombopag [see <i>Clinical Pharmacology</i> (12.3)]                                                                                                                            |
| <i>Intervention:</i>                 | Administer VIBERZI at a dose of 75 mg twice daily [see <i>Dosage and Administration</i> (2)] and monitor patients for impaired mental or physical abilities needed to perform potentially hazardous activities such as driving a car or operating machinery and for other eluxadoline-related adverse reactions [see <i>Adverse Reactions</i> (6.1)]. |
| <i>Examples:</i>                     | cyclosporine, gemfibrozil, antiretrovirals (atazanavir, lopinavir, saquinavir, tipranavir), rifampin, eltrombopag                                                                                                                                                                                                                                     |
| <b>Strong CYP Inhibitors*</b>        |                                                                                                                                                                                                                                                                                                                                                       |
| <i>Clinical Impact:</i>              | Potential for increased exposure to eluxadoline [see <i>Clinical Pharmacology</i> (12.3)]                                                                                                                                                                                                                                                             |
| <i>Intervention:</i>                 | Monitor patients for impaired mental or physical abilities needed to perform potentially hazardous activities such as driving a car or operating machinery and for other eluxadoline-related adverse reactions [see <i>Adverse Reactions</i> (6.1)].                                                                                                  |
| <i>Examples:</i>                     | ciprofloxacin, (CYP1A2), gemfibrozil (CYP2C8), fluconazole, (CYP2C19), clarithromycin (CYP3A4), paroxetine and bupropion, (CYP2D6)                                                                                                                                                                                                                    |
| <b>Drugs that Cause Constipation</b> |                                                                                                                                                                                                                                                                                                                                                       |
| <i>Clinical Impact:</i>              | Increased risk for constipation related adverse reactions and potential for constipation related serious adverse reactions                                                                                                                                                                                                                            |
| <i>Intervention:</i>                 | Avoid use with other drugs that may cause constipation (see below); loperamide may be used occasionally for acute management of severe diarrhea but avoid chronic use. Discontinue loperamide immediately if constipation occurs.                                                                                                                     |
| <i>Examples:</i>                     | alosetron, anticholinergics, opioids                                                                                                                                                                                                                                                                                                                  |

**Developed by  
Joe Grillo  
FDA (OCP, OTS)**

**with input from  
Ruth Day**

\*As a precautionary measure due to incomplete information on the metabolism of eluxadoline

|                     |  |
|---------------------|--|
| <b>Drug Class A</b> |  |
| Clinical Impact     |  |
| Intervention        |  |
| Examples            |  |
| <b>Drug Class B</b> |  |
| Clinical Impact     |  |
| Intervention        |  |
| Examples            |  |
| <b>Drug Class C</b> |  |
| Clinical Impact     |  |
| Intervention        |  |
| Examples            |  |

**Modified version**  
**General template**

|                     |                                                 |
|---------------------|-------------------------------------------------|
| <b>Drug Class A</b> |                                                 |
| Clinical Impact     | Increased exposure to Drug-X ....               |
| Intervention        | Administer Drug-X at a dose of ....             |
| Examples            |                                                 |
| <b>Drug Class B</b> |                                                 |
| Clinical Impact     | Potential for increased exposure to Drug-X .... |
| Intervention        | Monitor patients for ....                       |
| Examples            |                                                 |
| <b>Drug Class C</b> |                                                 |
| Clinical Impact     | Increased risk for adverse reaction Z ....      |
| Intervention        | Avoid use with other drugs that may ....        |
| Examples            |                                                 |

|                     |                                                 |
|---------------------|-------------------------------------------------|
| <b>Drug Class A</b> |                                                 |
| Clinical Impact     | Increased exposure to Drug-X ....               |
| Intervention        | Administer Drug-X at a dose of ....             |
| Examples            | aaaa, bbbb, cccc, dddd ....                     |
| <b>Drug Class B</b> |                                                 |
| Clinical Impact     | Potential for increased exposure to Drug-X .... |
| Intervention        | Monitor patients for ....                       |
| Examples            | eeee, ffff, gggg, hhhh ....                     |
| <b>Drug Class C</b> |                                                 |
| Clinical Impact     | Increased risk for adverse reaction Z ....      |
| Intervention        | Avoid use with other drugs that may ....        |
| Examples            | kkkk, mmmm, pppp, rrrr .....                    |

|                     |                                          |
|---------------------|------------------------------------------|
| <b>Drug Class A</b> |                                          |
| Clinical Impact     | Increased exposure to Drug-X ....        |
| Intervention        | Administer                               |
| Examples            | aaaa, bbbb,                              |
| <b>Drug Class B</b> |                                          |
| Clinical Impact     | Potential fo                             |
| Intervention        | Monitor pa                               |
| Examples            | eeee, ffff, g                            |
| <b>Drug Class C</b> |                                          |
| Clinical Impact     | Increased r                              |
| Intervention        | Avoid use with other drugs that may .... |
| Examples            | kkkk, mmmm, pppp, rrrr .....             |

**Schema**  
(organizing structure)

- easy to see at a glance
- easy to understand
- facilitates memory
- facilitates acquisition of new information



# “Wall Charts”

# “Wall Charts”

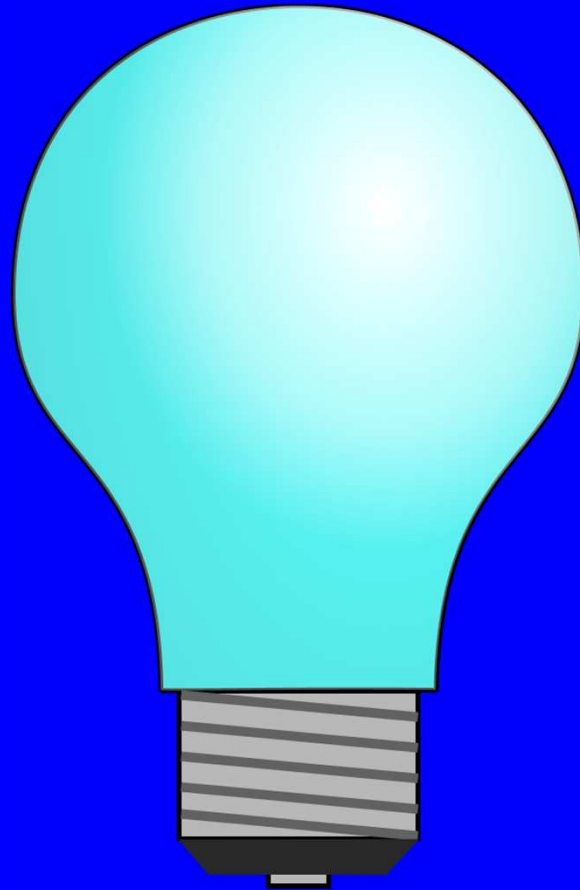



# Wall Charts

## **Problem: Information Load**

- lots of information, often complex
- how grasp key information quickly?
- how remember (at least something) later?
- how find it again when needed?

# Wall Charts

## **Problem: Information Load**

- lots of information, often complex
- how grasp key information quickly?
- how remember (at least something) later?
- how find it again when needed?

## **Suggestion: “Wall Chart”**

- key elements
- quick reminder
- focus on drugs that interact
- simple (like DDI “highlights”)

# Wall Charts

## Problem: Information Load

- lots of information, often complex
- how grasp key info
- how remember (at
- how find it again w

## Focus on

--main drugs that interact with HC

## Suggestion: “Wa

- key elements
- quick reminder
- focus on drugs that interact
- simple (like DDI “highlights”)

--their status within a simple schema

# Wall Charts

**Examples**

|                     | <b>Safety Effect</b>                                                  | <b>Efficacy Effect</b>                                                |
|---------------------|-----------------------------------------------------------------------|-----------------------------------------------------------------------|
| <b>Drug Class A</b> | Examples:<br>--XXXX    --XXXX<br>--XXXX    --XXXX<br>--XXXX    --XXXX | Examples:<br>--XXXX    --XXXX<br>--XXXX    --XXXX<br>--XXXX    --XXXX |
| <b>Drug Class B</b> | Examples:<br>--XXXX    --XXXX<br>--XXXX    --XXXX<br>--XXXX    --XXXX | Examples:<br>--XXXX    --XXXX<br>--XXXX    --XXXX<br>--XXXX    --XXXX |
| <b>Drug Class C</b> | Examples:<br>--XXXX    --XXXX<br>--XXXX    --XXXX<br>--XXXX    --XXXX | Examples:<br>--XXXX    --XXXX<br>--XXXX    --XXXX<br>--XXXX    --XXXX |

# Wall Charts

|                     | <b>Adverse Reactions</b>                                              | <b>Exposure Effects</b>                                                   |
|---------------------|-----------------------------------------------------------------------|---------------------------------------------------------------------------|
| <b>Drug Class A</b> | Examples:<br>--XXXX    --XXXX<br>--XXXX    --XXXX<br>--XXXX    --XXXX | Examples (↑)<br>--XXXX    --XXXX<br>--XXXX    --XXXX<br>--XXXX    --XXXX  |
| <b>Drug Class B</b> | Examples:<br>--XXXX    --XXXX<br>--XXXX    --XXXX<br>--XXXX    --XXXX | Examples: (↓)<br>--XXXX    --XXXX<br>--XXXX    --XXXX<br>--XXXX    --XXXX |
| <b>Drug Class C</b> | Examples:<br>--XXXX    --XXXX<br>--XXXX    --XXXX<br>--XXXX    --XXXX | Examples: (↑)<br>--XXXX    --XXXX<br>--XXXX    --XXXX<br>--XXXX    --XXXX |



# Wall Charts

|                     | <b>Established Interaction</b>                                        | <b>Potential Interaction</b>                                          |
|---------------------|-----------------------------------------------------------------------|-----------------------------------------------------------------------|
| <b>Drug Class A</b> | Examples:<br>--XXXX    --XXXX<br>--XXXX    --XXXX<br>--XXXX    --XXXX | Examples<br>--XXXX    --XXXX<br>--XXXX    --XXXX<br>--XXXX    --XXXX  |
| <b>Drug Class B</b> | Examples:<br>--XXXX    --XXXX<br>--XXXX    --XXXX<br>--XXXX    --XXXX | Examples:<br>--XXXX    --XXXX<br>--XXXX    --XXXX<br>--XXXX    --XXXX |
| <b>Drug Class C</b> | Examples:<br>--XXXX    --XXXX<br>--XXXX    --XXXX<br>--XXXX    --XXXX | Examples:<br>--XXXX    --XXXX<br>--XXXX    --XXXX<br>--XXXX    --XXXX |

# Wall Charts

|                         | <b>Potential for<br/>HC<br/>to affect other drugs</b>                 | <b>Potential for<br/>Other Drugs<br/>to affect HC</b>                 |
|-------------------------|-----------------------------------------------------------------------|-----------------------------------------------------------------------|
| <b>Drug<br/>Class A</b> | Examples:<br>--XXXX    --XXXX<br>--XXXX    --XXXX<br>--XXXX    --XXXX | Examples:<br>--XXXX    --XXXX<br>--XXXX    --XXXX<br>--XXXX    --XXXX |
| <b>Drug<br/>Class B</b> | Examples:<br>--XXXX    --XXXX<br>--XXXX    --XXXX<br>--XXXX    --XXXX | Examples:<br>--XXXX    --XXXX<br>--XXXX    --XXXX<br>--XXXX    --XXXX |
| <b>Drug<br/>Class C</b> | Examples:<br>--XXXX    --XXXX<br>--XXXX    --XXXX<br>--XXXX    --XXXX | Examples:<br>--XXXX    --XXXX<br>--XXXX    --XXXX<br>--XXXX    --XXXX |

# Wall Charts

|                           | <b>X</b>                                                              | <b>X</b>                                                              |
|---------------------------|-----------------------------------------------------------------------|-----------------------------------------------------------------------|
| <b>Health Condition A</b> | Examples:<br>--XXXX    --XXXX<br>--XXXX    --XXXX<br>--XXXX    --XXXX | Examples:<br>--XXXX    --XXXX<br>--XXXX    --XXXX<br>--XXXX    --XXXX |
| <b>Health Condition B</b> | Examples:<br>--XXXX    --XXXX<br>--XXXX    --XXXX<br>--XXXX    --XXXX | Examples:<br>--XXXX    --XXXX<br>--XXXX    --XXXX<br>--XXXX    --XXXX |
| <b>Health Condition C</b> | Examples:<br>--XXXX    --XXXX<br>--XXXX    --XXXX<br>--XXXX    --XXXX | Examples:<br>--XXXX    --XXXX<br>--XXXX    --XXXX<br>--XXXX    --XXXX |

# Wall Charts

| <b>Drug Class/<br/>Health Cond</b>                       | <b>x</b> | <b>x</b> |
|----------------------------------------------------------|----------|----------|
| <b>HIV</b><br><br>Drug-1:<br>Drug-2:<br>Drug-3:          |          |          |
| <b>AntiViral</b><br><br>Drug-1:<br>Drug-2:<br>Drug-3     |          |          |
| <b>AntiEpileptic</b><br><br>Drug-1:<br>Drug-2:<br>Drug-3 |          |          |

# Wall Charts

|                                                      | <b>Effect</b> | <b>Intervention</b> |
|------------------------------------------------------|---------------|---------------------|
| <b>Drug Class A</b><br>Drug-1:<br>Drug-2:<br>Drug-3: |               |                     |
| <b>Drug Class B</b><br>Drug-1:<br>Drug-2:<br>Drug-3: |               |                     |
| <b>Drug Class C</b><br>Drug-1:<br>Drug-2:<br>Drug-3: |               |                     |

# Wall Charts

|                                                      | <b>HC Effect:<br/>on Other Drugs</b> | <b>Other Drugs:<br/>Effects on HC</b> |
|------------------------------------------------------|--------------------------------------|---------------------------------------|
| <b>Drug Class A</b><br>Drug-1:<br>Drug-2:<br>Drug-3: |                                      |                                       |
| <b>Drug Class B</b><br>Drug-1:<br>Drug-2:<br>Drug-3  |                                      |                                       |
| <b>Drug Class C</b><br>Drug-1:<br>Drug-2:<br>Drug-3  |                                      |                                       |

# Wall Charts

| <b>Type of Effect</b>   | <b>Likely</b> | <b>Rare</b> |
|-------------------------|---------------|-------------|
| <b>Teratogenic</b>      |               |             |
| <b>Lactation</b>        |               |             |
| <b>Exposure Changes</b> |               |             |

# Wall Charts

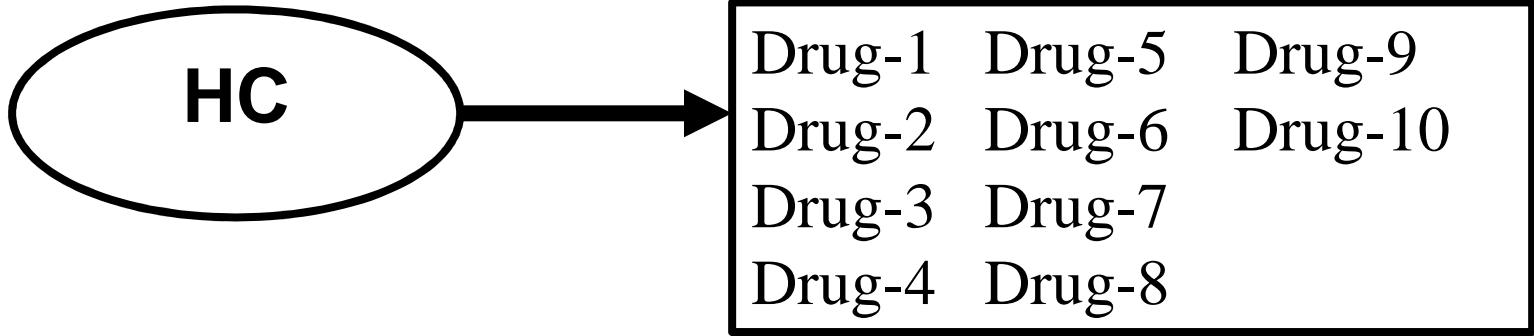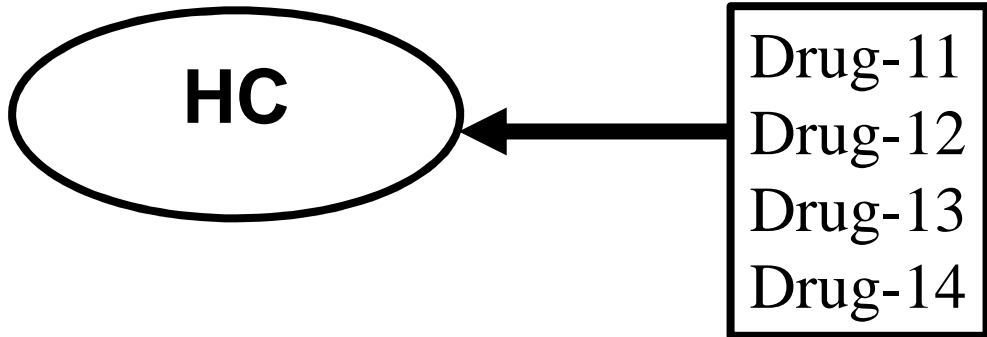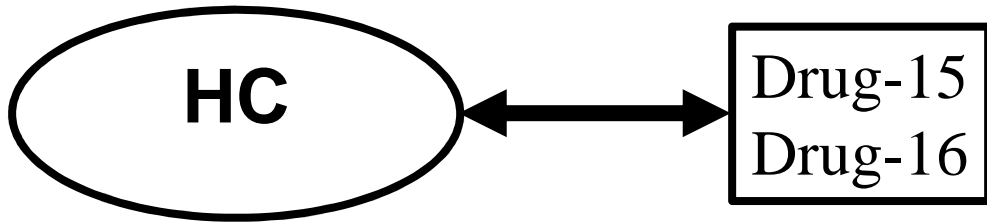



# Wall Charts

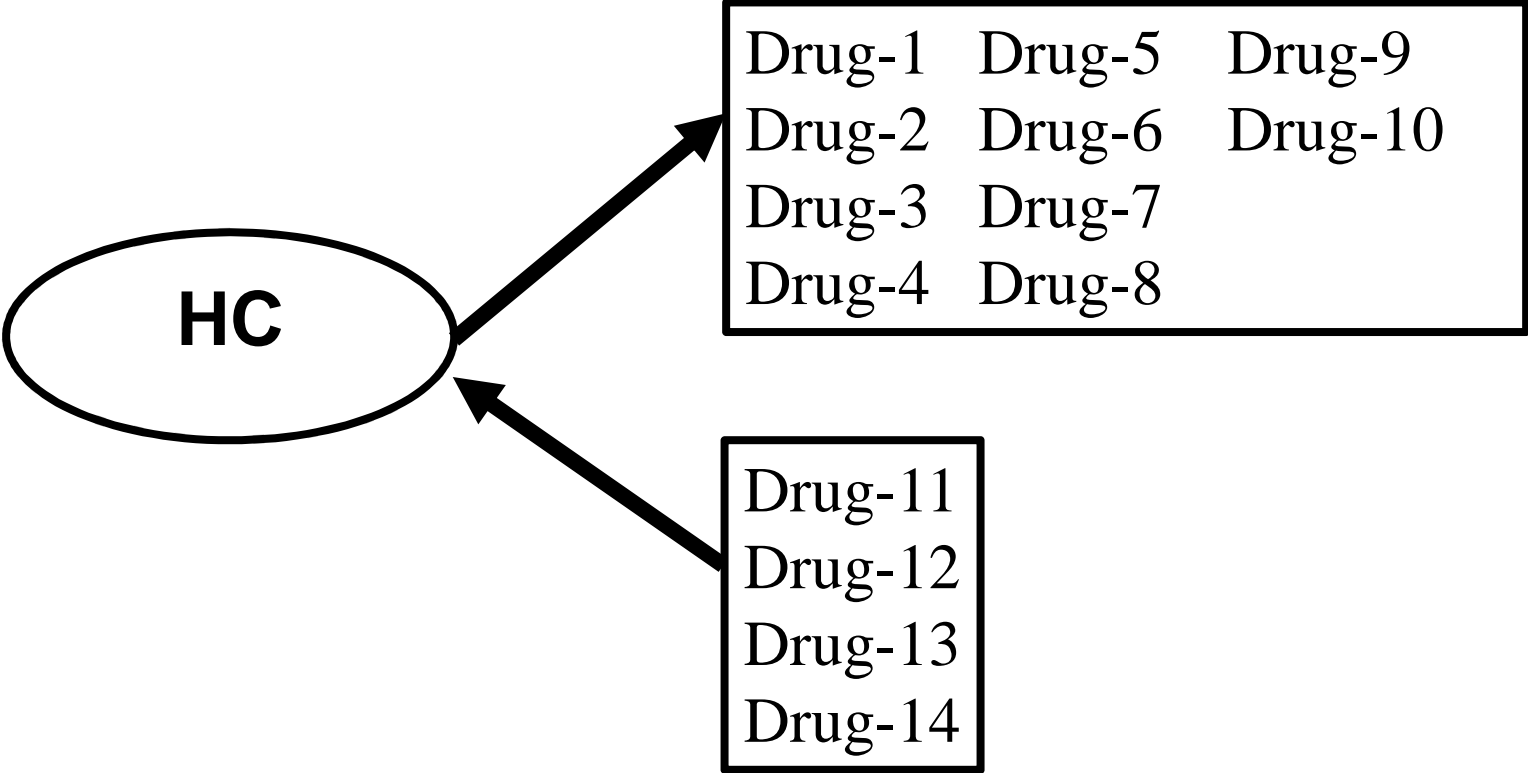

# Wall Charts

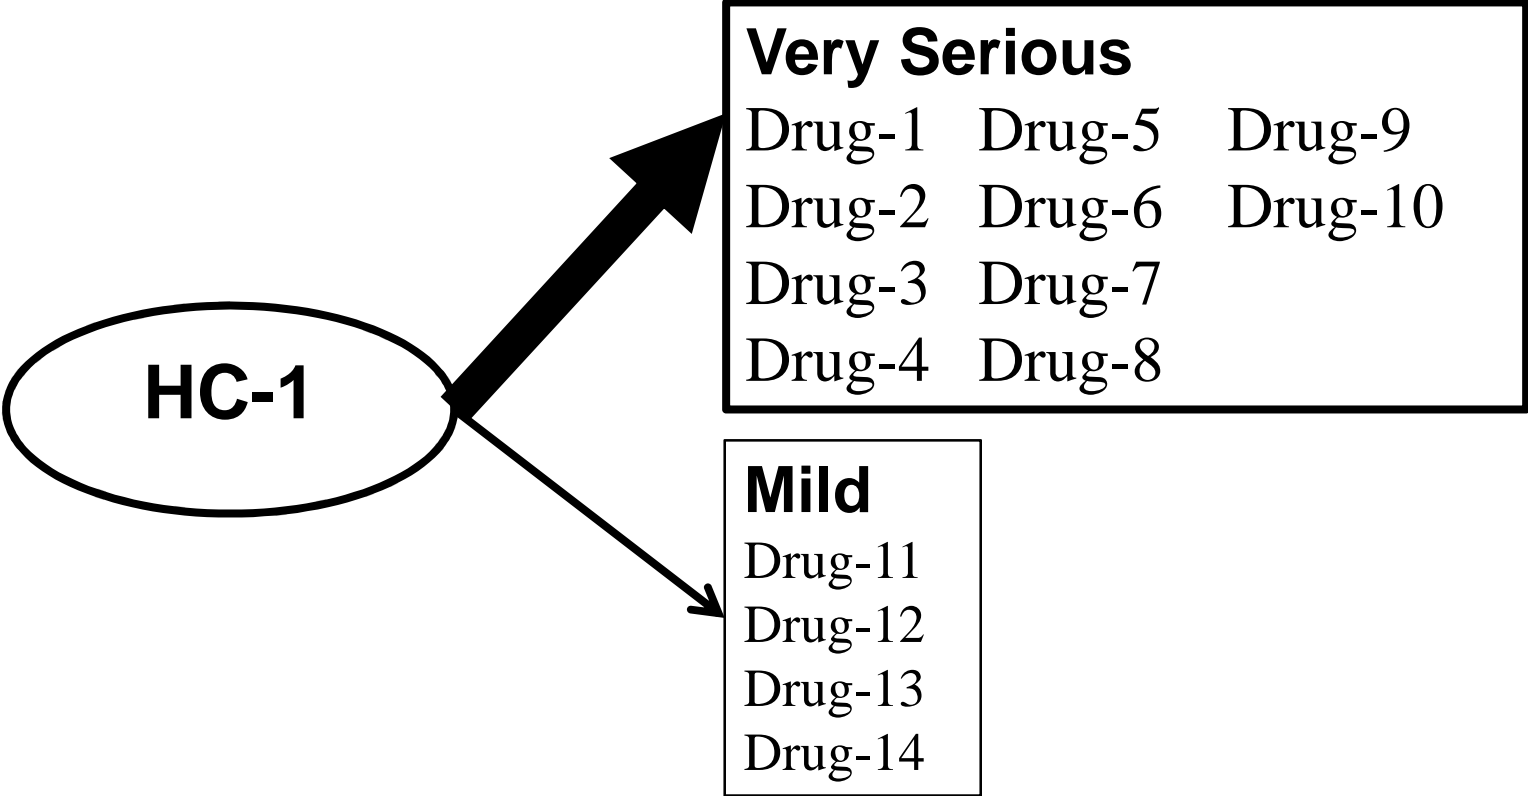

# Wall Charts

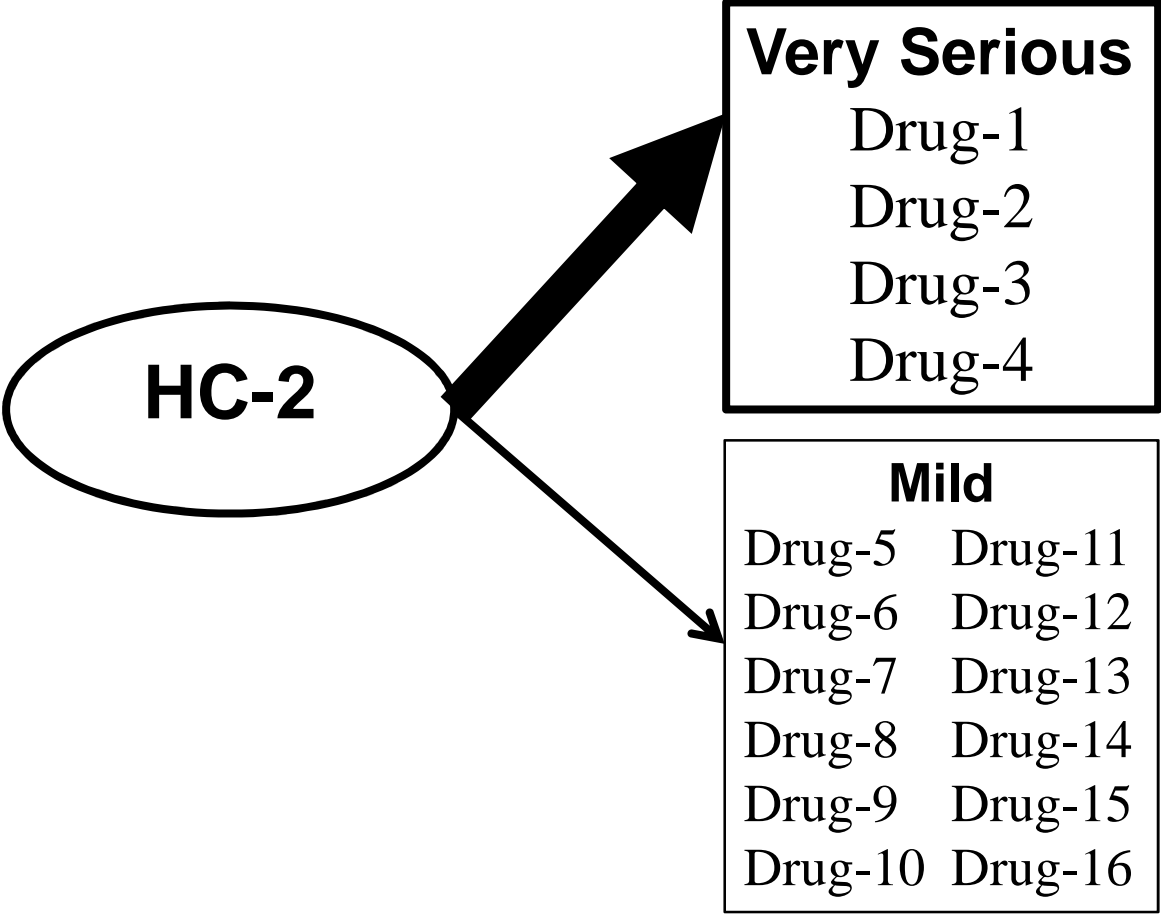

# Embedded Wall Chart

## 7 DRUG INTERACTIONS

Consult the labeling of all concurrently-used drugs to obtain further information about interactions with hormonal contraceptives or the potential for enzyme alterations.

### 7.1 Effects of Other Drugs on Combined Oral Contraceptives

**Substances diminishing the efficacy of COCs:** Drugs or herbal products that induce certain enzymes, including cytochrome P450 3A4 (CYP3A4), may decrease the effectiveness of COCs or increase breakthrough bleeding. Some drugs or herbal products that may decrease the effectiveness of hormonal contraceptives include phenytoin, barbiturates, carbamazepine, bosentan, felbamate, griseofulvin, oxcarbazepine, rifampin, topiramate and products containing St. John's wort. Interactions between oral contraceptives and other drugs may lead to breakthrough bleeding and/or contraceptive failure. Counsel women to use an alternative method of contraception or a back-up method when enzyme inducers are used with COCs, and to continue back-up contraception for 28 days after discontinuing the enzyme inducer to ensure contraceptive reliability.

**Substances increasing the plasma concentrations of COCs:** Co-administration of atorvastatin and certain COCs containing EE increase AUC values for EE by approximately 20%. Ascorbic acid and acetaminophen may increase plasma EE concentrations, possibly by inhibition of conjugation.

Concomitant administration of moderate or strong CYP3A4 inhibitors such as azole antifungals (e.g., ketoconazole, itraconazole, voriconazole, fluconazole), verapamil, macrolides (e.g., clarithromycin, erythromycin), diltiazem, and grapefruit juice can increase the plasma concentrations of the estrogen or the progestin or both. In a clinical drug-drug interaction study conducted in premenopausal women, once daily co-administration of DRSP 3 mg/EE 0.02 mg containing tablets with strong CYP3A4 inhibitor, ketoconazole 200 mg twice daily for 10 days resulted in a moderate increase of DRSP systemic exposure. The exposure of EE was increased mildly [see Warnings and Precautions (5.2) and Clinical Pharmacology (12.3)].

**Human immunodeficiency virus (HIV) Hepatitis C virus (HCV) protease inhibitors and non-nucleoside reverse transcriptase inhibitors:** Significant changes (increase or decrease) in the plasma concentrations of estrogen and progestin

12

transcriptase inhibitors.

**Antibiotics:** There have been reports of pregnancy while taking hormonal contraceptives and antibiotics, but clinical pharmacokinetic studies have not shown consistent effects of antibiotics on plasma concentrations of synthetic steroids.

### 7.2 Effects of Combined Oral Contraceptives on Other Drug:

COCs containing EE may inhibit the metabolism of other compounds. COCs have been shown to significantly decrease plasma concentrations of lamotrigine, likely due to induction of lamotrigine glucuronidation. This may reduce seizure control; therefore, dosage adjustments of lamotrigine may be necessary. Consult the labeling of the concurrently-used drug to obtain further information about interactions with COCs or the potential for enzyme alterations.

**COCs Increasing the Plasma Concentrations of CYP450 Enzymes:** In clinical studies, administration of a hormonal contraceptive containing EE did not lead to any increase or only to a weak increase in plasma concentrations of CYP3A4 substrates (e.g., midazolam) while plasma concentrations of CYP2C19 substrates (e.g., omeprazole and voriconazole) and CYP1A2 substrates (e.g., theophylline and tizanidine) can have a weak or moderate increase.

Clinical studies did not indicate an inhibitory potential of DRSP towards human CYP enzymes at clinically relevant concentrations [see Clinical Pharmacology (12.3)].

Women on thyroid hormone replacement therapy may need increased doses of thyroid hormone because serum concentration of thyroid-binding globulin increases with use of COCs.

**Potential to Increase Serum Potassium Concentration:** There is a potential for an increase in serum potassium concentration in women taking Beyaz with other drugs that may increase serum potassium concentration [see Warnings and Precautions (5.2) and Clinical Pharmacology (12.3)].

### 7.3 Effects of Folate on Other Drug:

Folate may modify the pharmacokinetics or pharmacodynamics of certain antifolate drugs, e.g., antiepileptics (such as phenytoin), methotrexate or pyrimethamine, and may result in a decreased pharmacological effect of the antifolate drug.

### 7.4 Effects of Other Drugs on Folate:

Several drugs have been reported to reduce folate concentrations by inhibition of the dihydrofolate reductase enzyme (e.g., methotrexate and sulfasalazine) or by reducing folate absorption (e.g., cholestyramine), or via unknown mechanisms (e.g., antiepileptics such as carbamazepine, phenytoin, phenobarbital, primidone and valproic acid).

### 7.5 Interference with Laboratory Tests

The use of contraceptive steroids may influence the results of certain laboratory tests, such as coagulation factors, lipids, glucose tolerance, and binding proteins. DRSP causes an increase in plasma renin activity and plasma aldosterone induced by its mild anti-mineralocorticoid activity. Folate may mask vitamin B12 deficiency. [See Warnings and Precautions (5.12) and Drug Interactions (7.2).]

### 7.6 Overview: Main Drugs that Interact with Drug-X

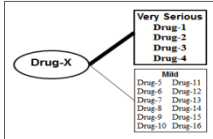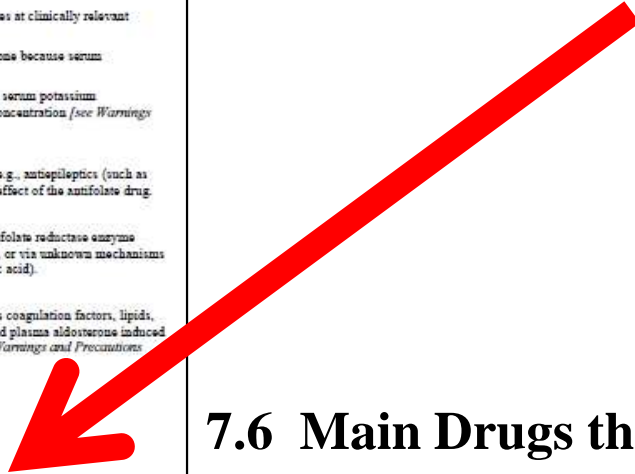

## 7.6 Main Drugs that Interact with HC-1

## 7.6 Main Drug Classes that Interact with HC-1

# Embedded Wall Chart

## 7 DRUG INTERACTIONS

Consult the labeling of all concurrently-used drugs to obtain further information about interactions with hormonal contraceptives or the potential for enzyme alterations.

### 7.1 Effects of Other Drugs on Combined Oral Contraceptives

**Substances diminishing the efficacy of COCs:** Drugs or herbal products that induce certain enzymes, including cytochrome P450 3A4 (CYP3A4), may decrease the effectiveness of COCs or increase breakthrough bleeding. Some drugs or herbal products that may decrease the effectiveness of hormonal contraceptives include phenytoin, barbiturates, carbamazepine, bosentan, felbamate, griseofulvin, oxcarbazepine, rifampin, topiramate and products containing St. John's wort. Interactions between oral contraceptives and other drugs may lead to breakthrough bleeding and/or contraceptive failure. Counsel women to use an alternative method of contraception or a back-up method when enzyme inducers are used with COCs, and to continue back-up contraception for 28 days after discontinuing the enzyme inducer to ensure contraceptive reliability.

**Substances increasing the plasma concentrations of COCs:** Co-administration of atorvastatin and certain COCs containing EE increase AUC values for EE by approximately 20%. Ascorbic acid and acetaminophen may increase plasma EE concentrations, possibly by inhibition of conjugation.

Concomitant administration of moderate or strong CYP3A4 inhibitors such as azole antifungals (e.g., ketoconazole, itraconazole, voriconazole, fluconazole), verapamil, macrolides (e.g., clarithromycin, erythromycin), diltiazem, and grapefruit juice can increase the plasma concentrations of the estrogen or the progestin or both. In a clinical drug-drug interaction study conducted in premenopausal women, once daily co-administration of DRSP 3 mg/EE 0.02 mg containing tablets with strong CYP3A4 inhibitor, ketoconazole 200 mg twice daily for 10 days resulted in a moderate increase of DRSP systemic exposure. The exposure of EE was increased mildly [see Warnings and Precautions (5.2) and Clinical Pharmacology (12.3)].

**Human immunodeficiency virus (HIV) Hepatitis C virus (HCV) protease inhibitors and non-nucleoside reverse transcriptase inhibitors:** Significant changes (increase or decrease) in the plasma concentrations of estrogen and progestin

12

### 7.6 Overview: Main Drugs that Interact with Drug-X

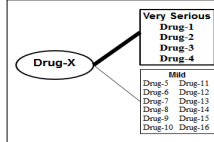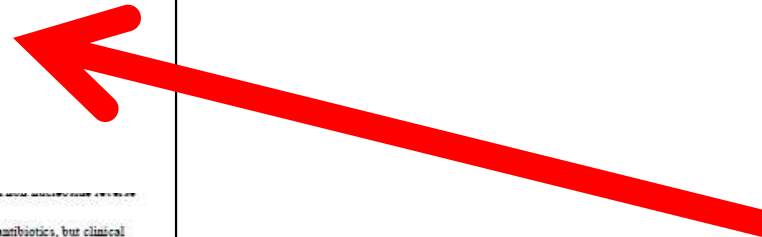

transcriptase inhibitors.

**Antibiotics:** There have been reports of pregnancy while taking hormonal contraceptives and antibiotics, but clinical pharmacokinetic studies have not shown consistent effects of antibiotics on plasma concentrations of synthetic steroids.

### 7.2 Effects of Combined Oral Contraceptives on Other Drugs

COCs containing EE may inhibit the metabolism of other compounds. COCs have been shown to significantly decrease plasma concentrations of lamotrigine, likely due to induction of lamotrigine glucuronidation. This may reduce seizure control; therefore, dosage adjustments of lamotrigine may be necessary. Consult the labeling of the concurrently-used drug to obtain further information about interactions with COCs or the potential for enzyme alterations.

**COCs Increasing the Plasma Concentrations of CYP450 Enzymes:** In clinical studies, administration of a hormonal contraceptive containing EE did not lead to any increase or only to a weak increase in plasma concentrations of CYP3A4 substrates (e.g., midazolam) while plasma concentrations of CYP2C19 substrate (e.g., omeprazole and voriconazole) and CYP1A2 substrates (e.g., theophylline and nizanidine) can have a weak or moderate increase.

Clinical studies did not indicate an inhibitory potential of DRSP towards human CYP enzymes at clinically relevant concentrations [see Clinical Pharmacology (12.3)].

Women on thyroid hormone replacement therapy may need increased doses of thyroid hormone because serum concentration of thyroid-binding globulin increases with use of COCs.

**Potential to Increase Serum Potassium Concentration:** There is a potential for an increase in serum potassium concentration in women taking Boyz with other drugs that may increase serum potassium concentration [see Warnings and Precautions (5.2) and Clinical Pharmacology (12.3)].

### 7.3 Effects of Folate on Other Drug:

Folate may modify the pharmacokinetics or pharmacodynamics of certain antifolate drugs, e.g., antiepileptics (such as phenytoin), methotrexate or pyrimethamine, and may result in a decreased pharmacological effect of the antifolate drug.

### 7.4 Effects of Other Drug on Folate:

Several drugs have been reported to reduce folate concentrations by inhibition of the dihydrofolate reductase enzyme (e.g., methotrexate and sulfasalazine) or by reducing folate absorption (e.g., cholestyramine), or via unknown mechanisms (e.g., antiepileptics such as carbamazepine, phenytoin, phenobarbital, primidone and valproic acid).

### 7.5 Interference with Laboratory Tests:

The use of contraceptive steroids may influence the results of certain laboratory tests, such as coagulation factors, lipids, glucose tolerance, and binding proteins. DRSP causes an increase in plasma renin activity and plasma aldosterone induced by its mild anti-mineralocorticoid activity. Folate may mask vitamin B12 deficiency. [See Warnings and Precautions (5.12) and Drug Interactions (7.2).]



# Embedded Wall Chart

## 7 DRUG INTERACTIONS

Consult the labeling of all concurrently-used drugs to obtain further information about interactions with hormonal contraceptives or the potential for enzyme alterations.

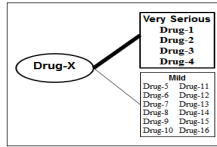

### 7.1 Effects of Other Drugs on Combined Oral Contraceptives

**Substances diminishing the efficacy of COCs:** Drugs or herbal products that induce certain enzymes, including cytochrome P450 3A4 (CYP3A4), may decrease the effectiveness of COCs or increase breakthrough bleeding. Some drugs or herbal products that may decrease the effectiveness of hormonal contraceptives include phenytoin, barbiturates, carbamazepine, bosentan, felbamate, griseofulvin, oxcarbazepine, rifampin, topiramate and products containing St. John's wort. Interactions between oral contraceptives and other drugs may lead to breakthrough bleeding and/or contraceptive failure. Counsel women to use an alternative method of contraception or a back-up method when enzyme inducers are used with COCs, and to continue back-up contraception for 28 days after discontinuing the enzyme inducer to ensure contraceptive reliability.

**Substances increasing the plasma concentrations of COCs:** Co-administration of atorvastatin and certain COCs containing EE increase AUC values for EE by approximately 20%. Ascorbic acid and acetaminophen may increase plasma EE concentrations, possibly by inhibition of conjugation.

Concomitant administration of moderate or strong CYP3A4 inhibitors such as azole antifungals (e.g., itraconazole, voriconazole, fluconazole), verapamil, macrolides (e.g., clarithromycin, erythromycin), diltiazem, and grapefruit juice can increase the plasma concentrations of the estrogen or the progestin or both. In a clinical drug-drug interaction study conducted in premenopausal women, once daily co-administration of DRSP 3 mg/EE 0.02 mg containing tablets with strong CYP3A4 inhibitor, ketoconazole 200 mg twice daily for 10 days resulted in a moderate increase of DRSP systemic exposure. The exposure of EE was increased mildly [see Warnings and Precautions (5.2) and Clinical Pharmacology (12.3)].

**Human immunodeficiency virus (HIV)/Hepatitis C virus (HCV) protease inhibitors and non-nucleoside reverse transcriptase inhibitors:** Significant changes (increase or decrease) in the plasma concentrations of estrogen and progestin

transcriptase inhibitors.

**Antibiotics:** There have been reports of pregnancy while taking hormonal contraceptives and antibiotics, but clinical pharmacokinetic studies have not shown consistent effects of antibiotics on plasma concentrations of synthetic steroids.

### 7.2 Effects of Combined Oral Contraceptives on Other Drugs

COCs containing EE may inhibit the metabolism of other compounds. COCs have been shown to significantly decrease plasma concentrations of lamotrigine, likely due to induction of lamotrigine glucuronidation. This may reduce seizure control; therefore, dosage adjustments of lamotrigine may be necessary. Consult the labeling of the concurrently-used drug to obtain further information about interactions with COCs or the potential for enzyme alterations.

**COCs Increasing the Plasma Concentrations of CYP450 Enzymes:** In clinical studies, administration of a hormonal contraceptive containing EE did not lead to any increase or only to a weak increase in plasma concentrations of CYP3A4 substrates (e.g., midazolam) while plasma concentrations of CYP2C19 substrate (e.g., omeprazole and voriconazole) and CYP1A2 substrates (e.g., theophylline and nizanidine) can have a weak or moderate increase.

Clinical studies did not indicate an inhibitory potential of DRSP towards human CYP enzymes at clinically relevant concentrations [see Clinical Pharmacology (12.3)].

Women on thyroid hormone replacement therapy may need increased doses of thyroid hormone because serum concentration of thyroid-binding globulin increases with use of COCs.

**Potential to Increase Serum Potassium Concentration:** There is a potential for an increase in serum potassium concentration in women taking Boyaz with other drugs that may increase serum potassium concentration [see Warnings and Precautions (5.2) and Clinical Pharmacology (12.3)].

### 7.3 Effects of Folate on Other Drug

Folate may modify the pharmacokinetics or pharmacodynamics of certain antifolate drugs, e.g., antiepileptics (such as phenytoin), methotrexate or pyrimethamine, and may result in a decreased pharmacological effect of the antifolate drug.

### 7.4 Effects of Other Drug on Folate

Several drugs have been reported to reduce folate concentrations by inhibition of the dihydrofolate reductase enzyme (e.g., methotrexate and sulfasalazine) or by reducing folate absorption (e.g., cholestyramine), or via unknown mechanisms (e.g., antiepileptics such as carbamazepine, phenytoin, phenobarbital, primidone and valproic acid).

### 7.5 Interference with Laboratory Tests

The use of contraceptive steroids may influence the results of certain laboratory tests, such as coagulation factors, lipids, glucose tolerance, and binding proteins. DRSP causes an increase in plasma renin activity and plasma aldosterone induced by its mild anti-mineralocorticoid activity. Folate may mask vitamin B12 deficiency. [See Warnings and Precautions (5.12) and Drug Interactions (7.2).]

## 7 DRUG INTERACTIONS

Consult the labeling of all concurrently-used drugs to obtain further information about interactions with hormonal contraceptives or the potential for enzyme alterations.

### 7.1 Effects of Other Drugs on Combined Oral Contraceptives

**Substances diminishing the efficacy of COCs:** Drugs or herbal products that induce certain enzymes, including cytochrome P450 3A4 (CYP3A4), may decrease the effectiveness of COCs or increase breakthrough bleeding. Some drugs or herbal products that may decrease the effectiveness of hormonal contraceptives include phenytoin, barbiturates, carbamazepine, bosentan, felbamate, griseofulvin, oxcarbazepine, rifampin, topiramate and products containing St. John's wort. Interactions between oral contraceptives and other drugs may lead to breakthrough bleeding and/or contraceptive failure. Counsel women to use an alternative method of contraception or a back-up method when enzyme inducers are used with COCs, and to continue back-up contraception for 28 days after discontinuing the enzyme inducer to ensure contraceptive reliability.

**Substances increasing the plasma concentrations of COCs:** Co-administration of atorvastatin and certain COCs containing EE increase AUC values for EE by approximately 20%. Ascorbic acid and acetaminophen may increase plasma EE concentrations, possibly by inhibition of conjugation.

Concomitant administration of moderate or strong CYP3A4 inhibitors such as azole antifungals (e.g., ketoconazole, itraconazole, voriconazole, fluconazole), verapamil, macrolides (e.g., clarithromycin, erythromycin), diltiazem, and grapefruit juice can increase the plasma concentrations of the estrogen or the progestin or both. In a clinical drug-drug interaction study conducted in premenopausal women, once daily co-administration of DRSP 3 mg/EE 0.02 mg containing tablets with strong CYP3A4 inhibitor, ketoconazole 200 mg twice daily for 10 days resulted in a moderate increase of DRSP systemic exposure. The exposure of EE was increased mildly [see Warnings and Precautions (5.2) and Clinical Pharmacology (12.3)].

**Human immunodeficiency virus (HIV) Hepatitis C virus (HCV) protease inhibitors and non-nucleoside reverse transcriptase inhibitors:** Significant changes (increase or decrease) in the plasma concentrations of estrogen and progestin

### 7.6 Overview: Main Drugs that Interact with Drug-X

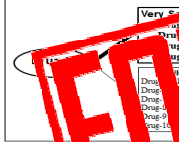

transcriptase inhibitors.

**Antibiotics:** There have been reports of pregnancy while taking hormonal contraceptives and antibiotics, but clinical pharmacokinetic studies have not shown consistent effects of antibiotics on plasma concentrations of synthetic steroids.

### 7.2 Effects of Combined Oral Contraceptives on Other Drugs

COCs containing EE may inhibit the metabolism of other compounds. COCs have been shown to significantly decrease plasma concentrations of lamotrigine, likely due to induction of lamotrigine glucuronidation. This may reduce seizure control; therefore, dosage adjustments of lamotrigine may be necessary. Consult the labeling of the concurrently-used drug to obtain further information about interactions with COCs or the potential for enzyme alterations.

**COCs Increasing the Plasma Concentrations of CYP450 Enzymes:** In clinical studies, administration of a hormonal contraceptive containing EE did not lead to any increase or only to a weak increase in plasma concentrations of CYP3A4 substrates (e.g., midazolam) while plasma concentrations of CYP2C19 substrate (e.g., omeprazole and voriconazole) and CYP1A2 substrates (e.g., theophylline and tizanidine) can have a weak or moderate increase.

Clinical studies did not indicate an inhibitory potential of DRSP towards human CYP enzymes at clinically relevant concentrations [see Clinical Pharmacology (12.3)].

Women on thyroid hormone replacement therapy may need increased doses of thyroid hormone because serum concentration of thyroid-binding globulin increases with use of COCs.

**Potential to Increase Serum Potassium Concentration:** There is a potential for an increase in serum potassium concentration in women taking Boyaz with other drugs that may increase serum potassium concentration [see Warnings and Precautions (5.2) and Clinical Pharmacology (12.3)].

### 7.3 Effects of Folate on Other Drugs

Folate may modify the pharmacokinetics or pharmacodynamics of certain antifolate drugs, e.g., antiepileptics (such as phenytoin), methotrexate or pyrimethamine, and may result in a decreased pharmacological effect of the antifolate drug.

### 7.4 Effects of Other Drugs on Folate

Several drugs have been reported to reduce folate concentrations by inhibition of the dihydrofolate reductase enzyme (e.g., methotrexate and sulfasalazine) or by reducing folate absorption (e.g., cholestyramine), or via unknown mechanisms (e.g., antiepileptics such as carbamazepine, phenytoin, phenobarbital, primidone and valproic acid).

### 7.5 Interference with Laboratory Tests

The use of contraceptive steroids may influence the results of certain laboratory tests, such as coagulation factors, lipids, glucose tolerance, and binding proteins. DRSP causes an increase in plasma renin activity and plasma aldosterone induced by its mild anti-mineralocorticoid activity. Folate may mask vitamin B12 deficiency. [See Warnings and Precautions (5.12) and Drug Interactions (7.2).]

Embedded  
Wall Chart

Prime Real Estate

If you had some,  
to foster key take-away message,

--what would it be?

--how would you display it?



## 7 DRUG INTERACTIONS

Consult the labeling of all concurrently-used drugs to obtain further information about interactions with hormonal contraceptives or the potential for enzyme alterations.

### 7.1 Effects of Other Drugs on Combined Oral Contraceptives

**Substances diminishing the efficacy of COCs:** Drugs or herbal products that induce certain enzymes, including cytochrome P450 3A4 (CYP3A4), may decrease the effectiveness of COCs or increase breakthrough bleeding. Some drugs or herbal products that may decrease the effectiveness of hormonal contraceptives include phenytoin, barbiturates, carbamazepine, bosentan, felbamate, griseofulvin, oxcarbazepine, rifampin, topiramate and products containing St. John's wort. Interactions between oral contraceptives and other drugs may lead to breakthrough bleeding and/or contraceptive failure. Counsel women to use an alternative method of contraception or a back-up method when enzyme inducers are used with COCs, and to continue back-up contraception for 28 days after discontinuing the enzyme inducer to ensure contraceptive reliability.

**Substances increasing the plasma concentrations of COCs:** Co-administration of atorvastatin and certain COCs containing EE increase AUC values for EE by approximately 20%. Ascorbic acid and acetaminophen may increase plasma EE concentrations, possibly by inhibition of conjugation.

Concomitant administration of moderate or strong CYP3A4 inhibitors such as azole antifungals (e.g., ketoconazole, itraconazole, voriconazole, fluconazole), verapamil, macrolides (e.g., clarithromycin, erythromycin), diltiazem, and grapefruit juice can increase the plasma concentrations of the estrogen or the progestin or both. In a clinical drug-drug interaction study conducted in premenopausal women, once daily co-administration of DRSP 3 mg/EE 0.02 mg containing tablets with strong CYP3A4 inhibitor, ketoconazole 200 mg twice daily for 10 days resulted in a moderate increase of DRSP systemic exposure. The exposure of EE was increased mildly [see Warnings and Precautions (5.2) and Clinical Pharmacology (12.3)].

**Human immunodeficiency virus (HIV) Hepatitis C virus (HCV) protease inhibitors and non-nucleoside reverse transcriptase inhibitors:** Significant changes (increase or decrease) in the plasma concentrations of estrogen or progestin have been reported.

### 7.6 Overview: Main Drugs that Interact with Drug-X

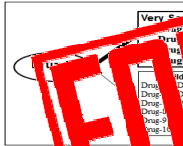

transcriptase inhibitors.

**Antibiotics:** There have been reports of decreased efficacy while taking hormonal contraceptives and antibiotics, but clinical pharmacokinetic studies have not shown consistent effects of antibiotics on plasma concentrations of synthetic steroids.

### 7.2 Effects of Combined Oral Contraceptives on Other Drugs

COCs containing EE may inhibit the metabolism of other compounds. COCs have been shown to significantly decrease plasma concentrations of lamotrigine, likely due to induction of lamotrigine glucuronidation. This may reduce seizure control; therefore, dosage adjustments of lamotrigine may be necessary. Consult the labeling of the concurrently-used drug to obtain further information about interactions with COCs or the potential for enzyme alterations.

**COCs Increasing the Plasma Concentrations of CYP450 Enzymes:** In clinical studies, administration of a hormonal contraceptive containing EE did not lead to any increase or only to a weak increase in plasma concentrations of CYP3A4 substrates (e.g., midazolam) while plasma concentrations of CYP2C19 substrate (e.g., omeprazole and voriconazole) and CYP1A2 substrates (e.g., theophylline and tizanidine) can have a weak or moderate increase.

Clinical studies did not indicate an inhibitory potential of DRSP towards human CYP enzymes at clinically relevant concentrations [see Clinical Pharmacology (12.3)].

Women on thyroid hormone replacement therapy may need increased doses of thyroid hormone because serum concentration of thyroid-binding globulin increases with use of COCs.

**Potential to Increase Serum Potassium Concentration:** There is a potential for an increase in serum potassium concentration in women taking Boyz with other drugs that may increase serum potassium concentration [see Warnings and Precautions (5.2) and Clinical Pharmacology (12.3)].

### 7.3 Effects of Folate on Other Drugs

Folate may modify the pharmacokinetics or pharmacodynamics of certain antifolate drugs, e.g., antiepileptics (such as phenytoin), methotrexate or pyrimethamine, and may result in a decreased pharmacological effect of the antifolate drug.

### 7.4 Effects of Other Drugs on Folate

Several drugs have been reported to reduce folate concentrations by inhibition of the dihydrofolate reductase enzyme (e.g., methotrexate and sulfasalazine) or by reducing folate absorption (e.g., cholestyramine), or via unknown mechanisms (e.g., antiepileptics such as carbamazepine, phenytoin, phenobarbital, primidone and valproic acid).

### 7.5 Interference with Laboratory Tests

The use of contraceptive steroids may influence the results of certain laboratory tests, such as coagulation factors, lipids, glucose tolerance, and binding proteins. DRSP causes an increase in plasma renin activity and plasma aldosterone induced by its mild anti-mineralocorticoid activity. Folate may mask vitamin B12 deficiency. [See Warnings and Precautions (5.12) and Drug Interactions (7.2).]

# Embedded Wall Chart

## Prime Real Estate

If you had some,  
to foster key take-away message,

--what would it be?

--how would you display it?

## And if you lost that space

--how would you enhance

the existing space

--to increase comprehension, memory,  
and safe/effective use?



# LET'S SHIFT GEARS

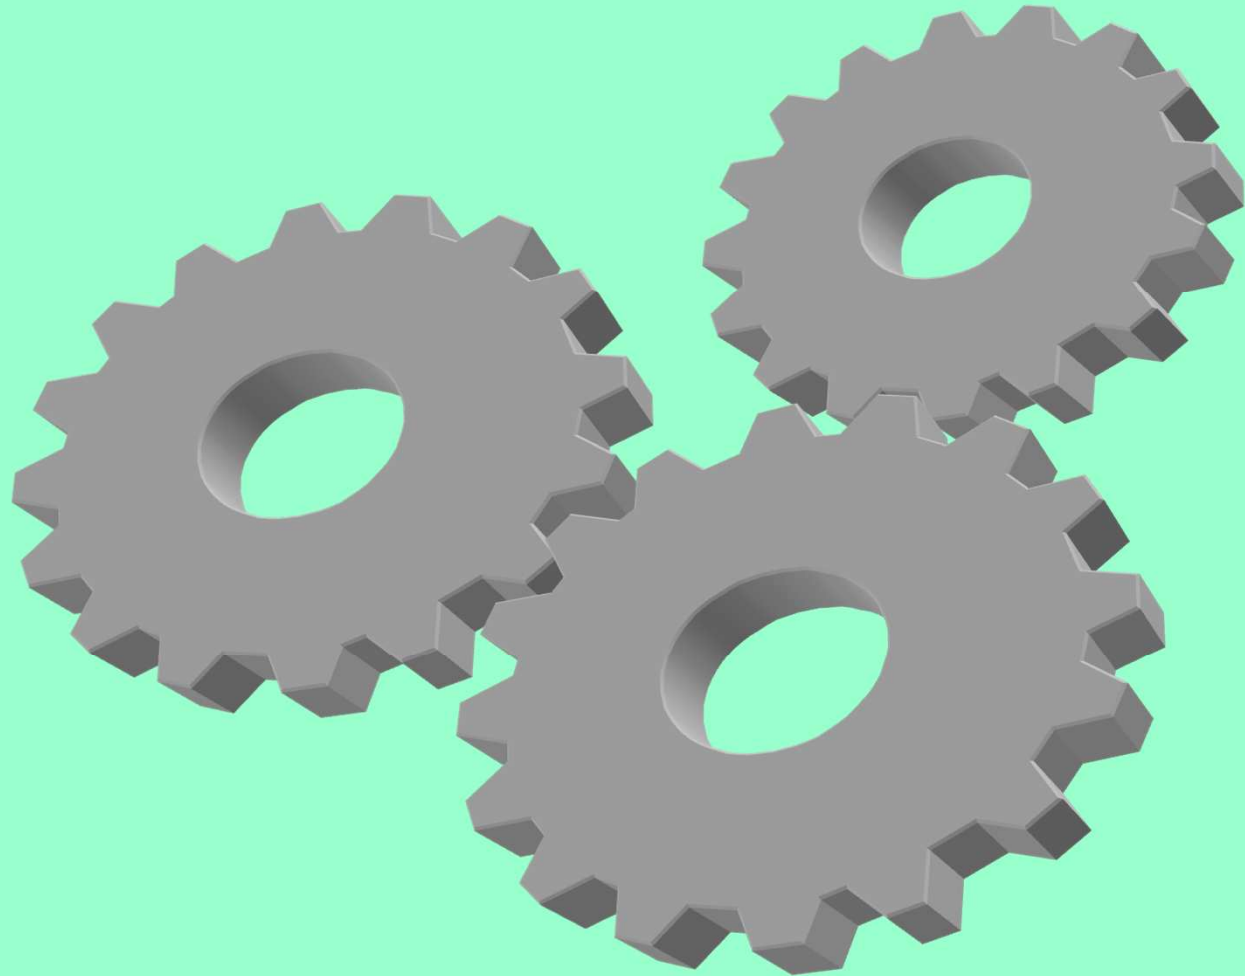

# Drug Interactions

## Patient Counseling

### Section 17

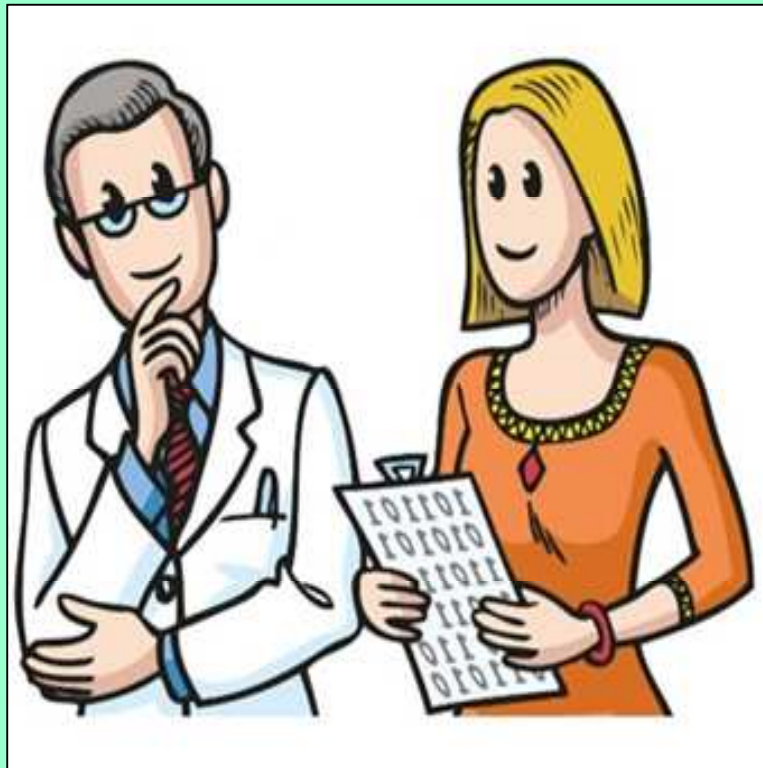

# Drug Interactions

## Patient Counseling

### Section 17



- Written for providers:  
(what to tell patients)
- NOT the  
“FDA Approved  
Patient Labeling”
- Instead, for  
provider-patient  
communication

*Do not take  
Drug-X with  
Drug-Y*

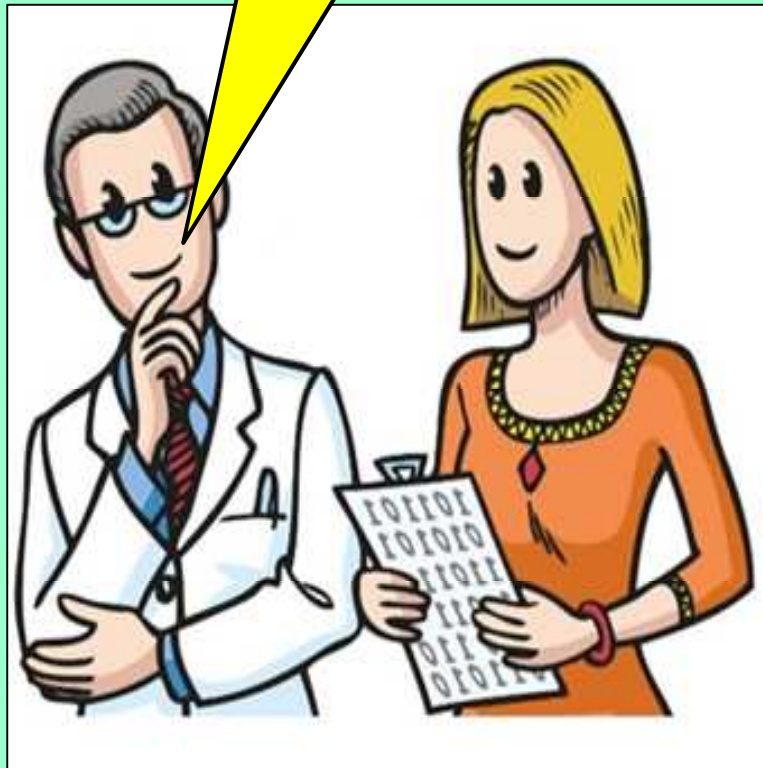

*Do not take  
Drug-X with  
Drug-Y*

*Hmmmm. OK,  
I'll wait an hour,  
then take Drug-Y*

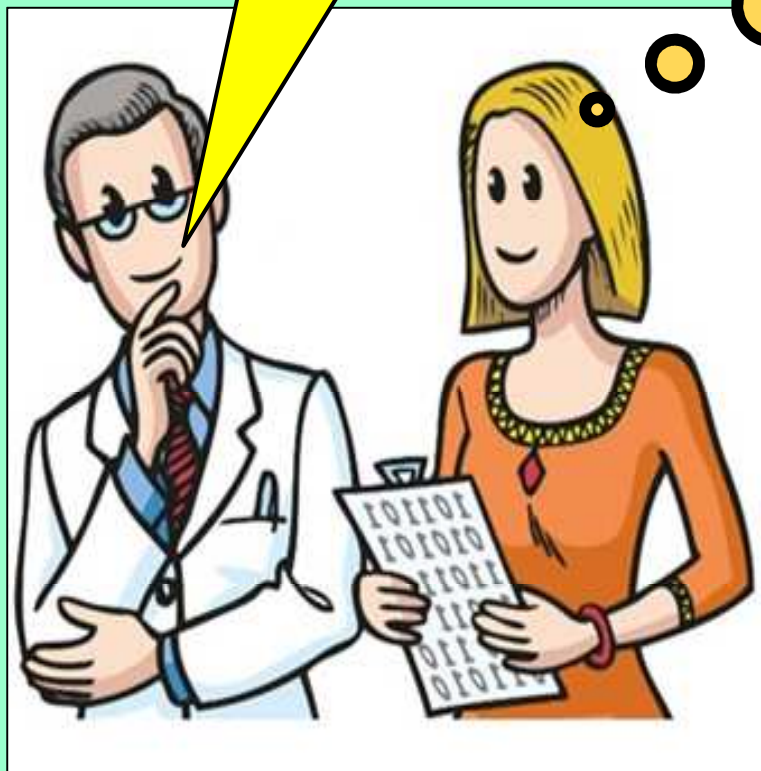



*Do not take  
Drug-X with  
Drug-Y*

*Hmmmm. OK,  
I'll wait an hour,  
then take Drug-Y*

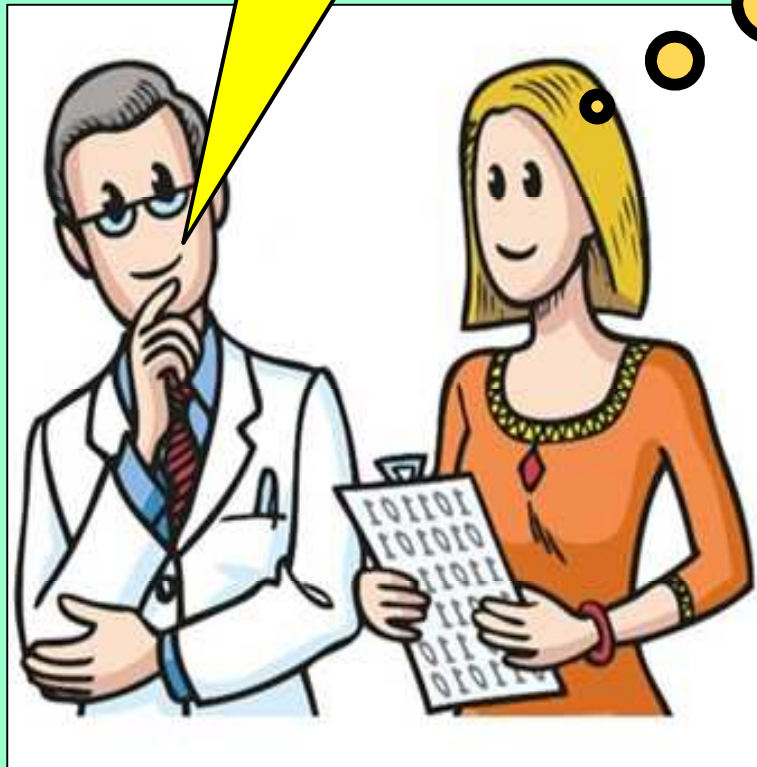

**Sure, plain language.  
But:** multiple interpretations.

- 1) "Not at the same time, but wait a while, then it's OK"
- 2) "Never take Drug-Y during the course of treatment with Drug-X."

**Alternative Meanings Test**

## Sample Section 17

### 17 PATIENT COUNSELING INFORMATION

See “FDA-approved patient labeling (Patient Information).”

- Counsel patients that cigarette smoking increases the risk of serious cardiovascular events from COC use, and that women who are over 35 years old and smoke should not use COCs.
- Counsel patients that the increased risk of VTE compared to non-users of COCs is greatest after initially starting a COC or restarting (following a 4-week or greater pill-free interval) the same or a different COC.
- Counsel patients about the information regarding the risk of VTE with DRSP-containing COCs compared to COCs that contain levonorgestrel or some other progestins.
- Counsel patients that Drug-X does not protect against HIV-infection (AIDS) and other sexually transmitted diseases.
- Counsel patients on Warnings and Precautions associated with COCs.
- Counsel patients that Drug-X contains DRSP. Drospirenone may increase potassium. Patients should be advised to inform their healthcare provider if they have kidney, liver or adrenal disease because the use of Drug-X in the presence of these conditions could cause serious heart and health problems. They should also inform their healthcare provider if they are currently on daily, long-term treatment (NSAIDs, potassium-sparing diuretics, potassium supplementation, ACE inhibitors, angiotensin-II receptor antagonists, heparin or aldosterone antagonists) for a chronic condition or taking strong CYP3A4 inhibitors.
- Inform patients that Drug-X is not indicated during pregnancy. If pregnancy occurs during treatment with Drug-X, instruct the patient to stop further intake. However, women should be advised on the continued need of sufficient folate intake.
- Counsel patients to take one tablet daily by mouth at the same time every day. Instruct patients what to do in the event pills are missed. See “What to Do if You Miss Pills” section in FDA-Approved Patient Labeling.
- Counsel patients to use a back-up or alternative method of contraception when enzyme inducers are used with COCs.
- Counsel patients who are breastfeeding or who desire to breastfeed that COCs may reduce breast milk production. This is less likely to occur if breastfeeding is well established.
- Counsel any patient who starts COCs postpartum, and who has not yet had a period, to use an additional method of contraception until she has taken a pink tablet for 7 consecutive days.
- Counsel patients that amenorrhea may occur. Rule out pregnancy in the event of amenorrhea in two or more consecutive cycles.
- Counsel patients to report whether they are taking folate supplements. Drug-X contains the equivalent of 0.4 mg (400 mcg) of folic acid.
- Counsel patients to maintain folate supplementation if they discontinue Drug-X due to pregnancy

Ruth Day

## Sample Section 17

### 17 PATIENT COUNSELING INFORMATION

See “FDA-approved patient labeling (Patient Information).”

- Counsel patients that cigarette smoking increases the risk of serious cardiovascular events from COC use, and that women who are over 35 years old and smoke should not use COCs.

- Counsel patients on restarting COCs.

- Counsel patients that COCs contain levonorgestrel.

- Counsel patients on risks of diseases.

contraception until she has taken a pink tablet for 7 consecutive days.

- Counsel patients that amenorrhea may occur. Rule out pregnancy in the event of amenorrhea in two or more consecutive cycles.

- Counsel patients to report whether they are taking folate supplements. Drug-X contains the equivalent of 0.4 mg (400 mcg) of folic acid.

- Counsel patients to maintain folate supplementation if they discontinue Drug-X due to pregnancy

**Many Sec. 17's look like this.  
Have improved over the years.**

**Mostly plain language.**

**But cognitive accessibility  
could be improved.**

starting a COC or

to COCs that

diseases.

vised to inform

nce of these

if they are

ACE inhibitors,

ng CYP3A4

Drug-X, instruct

ate intake.

in the event pills

with COCs.

duction. This is

method of



## 17 PATIENT COUNSELING INFORMATION

See “FDA-approved patient labeling (Patient Information).”

- Counsel patients that ....
- Counsel patients that ....
- Counsel patients about ...
- Counsel patients that ....
- Counsel patients on ....
- Counsel patients that ....
- Inform patients that ....
- Counsel patients to ....  
Counsel patients to ....
- Counsel any patient who ....
- Counsel patients that ....
- Counsel patients to ....
- Counsel patients to ....

# 17 PATIENT COUNSELING INFORMATION

See “FDA-approved patient labeling (Patient Information).”

- Counsel patients that ....
- Counsel patients that ....
- Counsel patients about ...
- Counsel patients that ....
- Counsel patients on ....
- Counsel patients that ....
- Inform patients that ....
- Counsel patients to ....
- Counsel patients to ....
- Counsel any patient who ....
- Counsel patients that ....
- Counsel patients to ....
- Counsel patients to ....

**Effortful reading.**

**What are the topics?**

**Where is DDI?**

**Or anything else?**

## 17 PATIENT COUNSELING INFORMATION

See “FDA-approved patient labeling (Patient Information).”

- Counsel patients that ....
- Counsel patients that ....
- Counsel patients about ... [ **DDI** ]
- Counsel patients that ....
- Counsel patients on ....
- Counsel patients that . [ **1 DDI + 1 Precaution + 8 DDI's** ]
- Inform patients that ... .
- Counsel patients to ....  
Counsel patients to ... [ **~ DDI** ]
- Counsel any patient who
- Counsel patients that
- Counsel patients to ... [ **~ DDI** ]
- Counsel patients to

## 17 PATIENT COUNSELING INFORMATION

See “FDA-approved patient labeling (Patient Information).”

- Counsel patients that ....
- Counsel patients that ....
- Counsel patients about ... [ **DDI** ]
- Counsel patients that ....
- Counsel patients on ....
- Counsel patients that . [ **1 DDI + 1 Precaution + 8 DDI's** ]
- Inform patients that ... .
- Counsel patients to ....  
Counsel patients to ... [ **~ DDI** ]
- Counsel any patient who
- Counsel patients that
- Counsel patients to ... [ **~ DDI** ]
- Counsel patients to

**Uh-oh.**

**DDI in several locations.**

# 17 PATIENT COUNSELING INFORMATION

See “FDA-approved patient labeling (Patient Information).”

- Counsel patients that ....
- Counsel patients that ....
- Counsel patients about ... [ **DDI** ]
- Counsel patients that ....
- Counsel patients on ....
- Counsel patients that . [ **1 DDI + 1 Precaution + 8 DDI's** ]
- Inform patients that ... .
- Counsel patients to ....  
Counsel patients to ... [ **~ DDI** ]
- Counsel any patient who
- Counsel patients that
- Counsel patients to ... [ **~ DDI** ]
- Counsel patients to

**Uh-oh.  
DDI in several locations.**

**Cognitive Violations:**  
--No clustering  
--No chunking  
--No explicit coding

# 17 PATIENT COUNSELING INFORMATION

See “FDA-approved patient labeling (Patient Information).”

- Counsel patients that ....
- Counsel patients that ....
- Counsel patients about ... [ **DDI** ]
- Counsel patients that ....
- Counsel patients on ....
- Counsel patients that . [ **1 DDI + 1 Precaution + 8 DDI's** ]
- Inform patients that ... .
- Counsel patients to ....
- Counsel patients to ... [ ~ **DDI** ]
- Counsel any patient who
- Counsel patients that
- Counsel patients to ... [ ~ **DDI** ]
- Counsel patients to

**Uh-oh.  
DDI in several locations.**

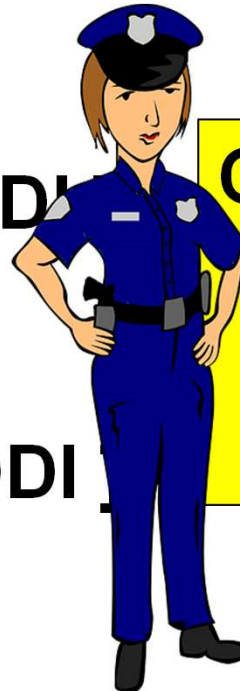

**Cognitive Violations:**  
--No clustering  
--No chunking  
--No explicit coding

## **17 PATIENT COUNSELING INFORMATION**

See “FDA-approved patient labeling (Patient Information).”

Counsel patients that:

**Topic-A:** xxxxxxxxxxxx

**Topic-B:** xxxxxxxxxxxx

**Topic-C:** xxxxxxxxxxxx

### **Drug Interactions:**

--

--

--

**Topic-E:** xxxxxxxxxxxx

**Topic-F:** xxxxxxxx

## **17 PATIENT COUNSELING INFORMATION**

See “FDA-approved patient labeling (Patient Information).”

Counsel patients that:

**Topic-A:** xxxxxxxxxxxx

**Topic-B:** xxxxxxxxxxxx

**Topic-C:** xxxxxxxxxxxx

**Drug Interactions:**

--

--

--

**Topic-E:** xxxxxxxxxxxx

**Topic-F:** xxxxxxxx

### **Cognitive Principles Used:**

--Clustering

--Chunking

--Explicit coding



## 17 PATIENT COUNSELING INFORMATION

See “FDA-approved patient labeling (Patient Information).”

Counsel patients that:

**Topic-A:** xxxxxxxxxxxx

**Topic-B:** xxxxxxxxxxxx

**Topic-C:** xxxxxxxxxxxx

**Drug Interactions:**

--

--

--

**Topic-E:** xxxxxxxxxxxx

**Topic-F:** xxxxxxxx

### **Cognitive Principles Used:**

- Clustering
- Chunking
- Explicit coding

### **Therefore**

- decrease effort
- speed processing
- increase processing
- boost memory

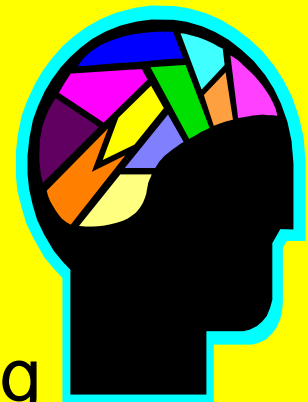

# Lots of Ideas

**Pros**

**Cons**
