# Supplementary material
Source: PubMed Central journal article supplement (PMC11022830)
Supplement: NIHMS1009393-supplement-Supplemental_material_15.pdf [file NIHMS1009393-supplement-Supplemental_material_15.pdf]

**Drug Interactions with Hormonal Contraceptives:  
Public Health and Drug Development Implications**

**Regulatory Science and Research Opportunities  
in Evaluation of Drug Interactions with  
Hormonal Contraceptives**

**Lei Zhang, Ph.D.**

Senior Advisor for Regulatory Programs and Policy  
Office of Clinical Pharmacology  
Office of Translational Sciences  
Center for Drug Evaluation and Research  
Food and Drug Administration

FDA Public Meeting  
November 9, 2015

## Disclaimer

- The opinions expressed in this presentation are mine and do not necessarily reflect the official views of the U.S. Food and Drug Administration (FDA).

# FDA's Strategy for Driving Innovation

## Critical Path Initiative

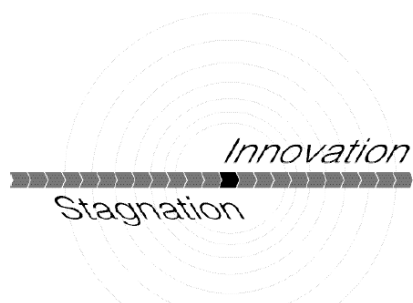

**Challenge and Opportunity  
on the Critical Path  
to New Medical  
Products**

U.S. Department of Health and Human Services  
Food and Drug Administration  
March 2004

2004 & 2006

## Strategic Plan for Regulatory Science

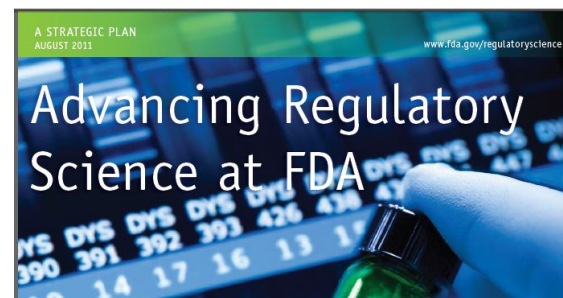

**Regulatory science:**  
*"...the science of developing new tools, standards and approaches to assess the safety, efficacy, quality and performance of FDA-regulated products."*

U.S. DEPARTMENT OF HEALTH AND HUMAN SERVICES  
U.S. FOOD AND DRUG ADMINISTRATION

2011

# CDER Scientific and Research Needs Document

July | 11

## Identifying CDER's Science and Research Needs Report

July 2011

The CDER Science Prioritization and  
Review Committee (SPaRC)

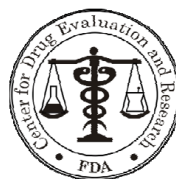

---

Center for Drug Evaluation and Research

---

July 2011

<http://www.fda.gov/downloads/Drugs/ScienceResearch/UCM264594.pdf>

# Seven Major Categories

1. Improve Access to Post-market Data Sources and Explore Feasibility of Their Use in Different Types of Analyses
2. Improve Risk Assessment and Management Strategies to Reinforce the Safe Use of Drugs
3. Evaluate the Effectiveness and Impact of Different Types of Regulatory Communications to the Public and other Stakeholders
4. Evaluate the Link Among Product Quality Attributes, Manufacturing Processes, and Product Performance
5. Develop and Improve Predictive Models of Safety and Efficacy in Humans
6. Improve Clinical Trial Design, Analysis, and Conduct
7. Enhance Individualization of Patient Treatment

<http://www.fda.gov/downloads/Drugs/ScienceResearch/UCM264594.pdf>

# Seven Major Categories

1. Improve Access to Post-market Data Sources and Explore Feasibility of Their Use in Different Types of Analyses
- 2. Improve Risk Assessment and Management Strategies to Reinforce the Safe Use of Drugs**
- 3. Evaluate the Effectiveness and Impact of Different Types of Regulatory Communications to the Public and other Stakeholders**
4. Evaluate the Link Among Product Quality Attributes, Manufacturing Processes, and Product Performance
- 5. Develop and Improve Predictive Models of Safety and Efficacy in Humans**
- 6. Improve Clinical Trial Design, Analysis, and Conduct**
- 7. Enhance Individualization of Patient Treatment**

<http://www.fda.gov/downloads/Drugs/ScienceResearch/UCM264594.pdf>

# Key regulatory questions and knowledge gaps regarding drug interactions with hormonal contraceptives

- Key considerations for study design
  - How to maximize knowledge gained for decision-making
- Data translation and extrapolation
  - Need to understand metabolic/transport pathways
  - Need to understand exposure-response
- Labeling and health communication
- Therapeutic areas that warrant more research to understand HC use

**Research Needs and Tools**



One tool for  
DDI Prediction

# Applications of Physiologically Based Pharmacokinetic (PBPK) Modeling and Simulation During Regulatory Review

P Zhao<sup>1</sup>, L Zhang<sup>1</sup>, JA Grillo<sup>1</sup>, Q Liu<sup>1</sup>, JM Bullock<sup>1</sup>, YJ Moon<sup>1</sup>, P Song<sup>1</sup>, SS Brar<sup>1</sup>, R Madabushi<sup>1</sup>, TC Wu<sup>1</sup>, BP Booth<sup>1</sup>, NA Rahman<sup>1</sup>, KS Reynolds<sup>1</sup>, E Gil Berglund<sup>2</sup>, LJ Lesko<sup>1</sup> and S-M Huang<sup>1</sup>

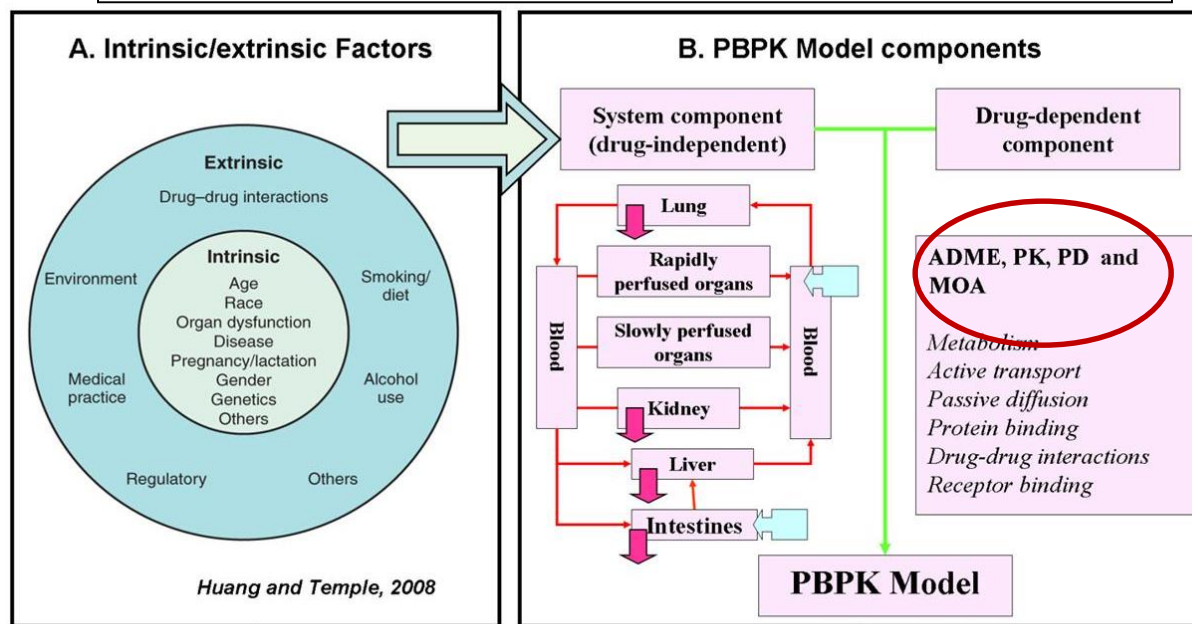

Predict, Learn, Confirm

Apply

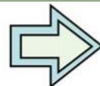

Individual or combined effects on  
human physiology

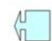

Dosing

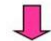

Elimination

Degree of complexity of the PBPK model can vary according to the need



# Regulatory Submissions with PBPK Data

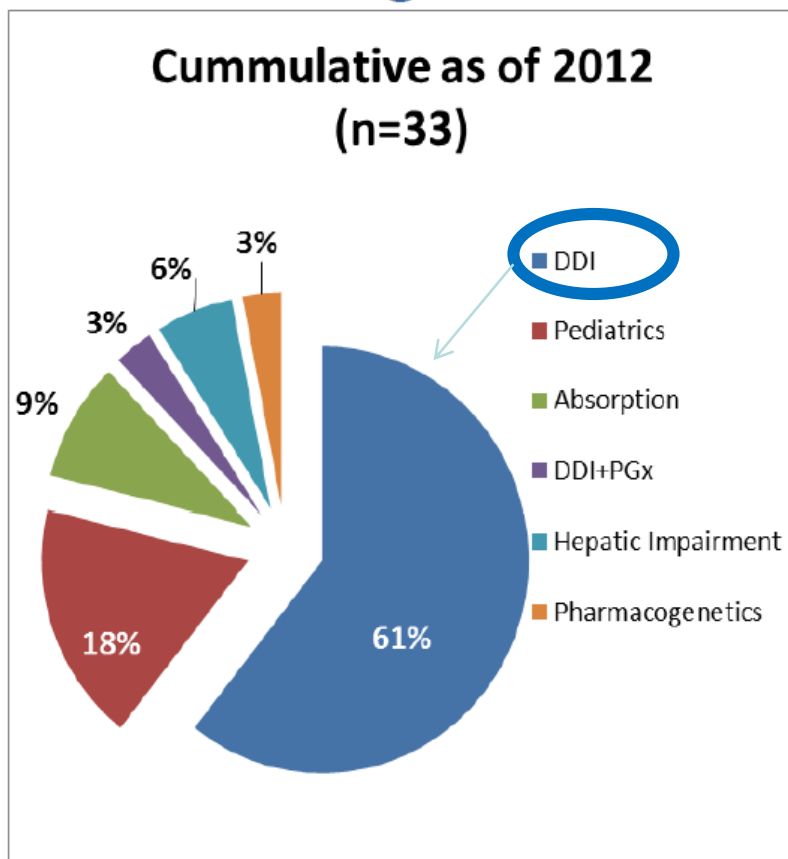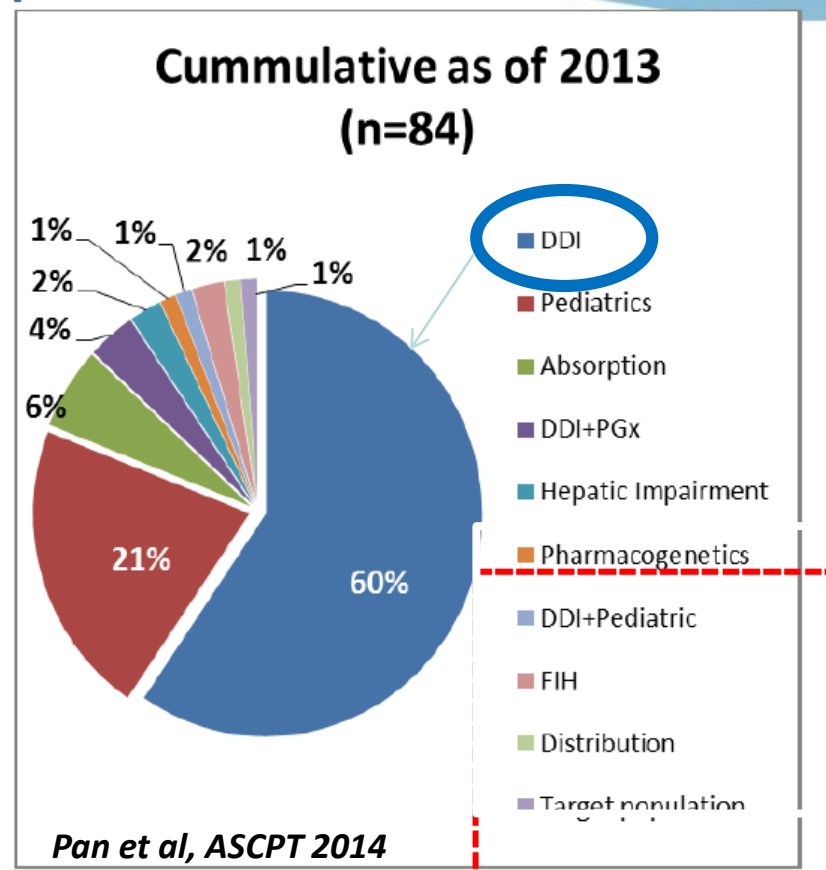

*Huang et al, J Pharm Sci, 2013*

- Increased use of PBPK by drug developers
- Majority of the cases were related to DDI (~60%)

# PBPK & Drug Interactions

## Example: Ibrutinib

PBPK-Simulated and observed C<sub>max</sub> and AUC ratios (mean and 95% confidence interval)

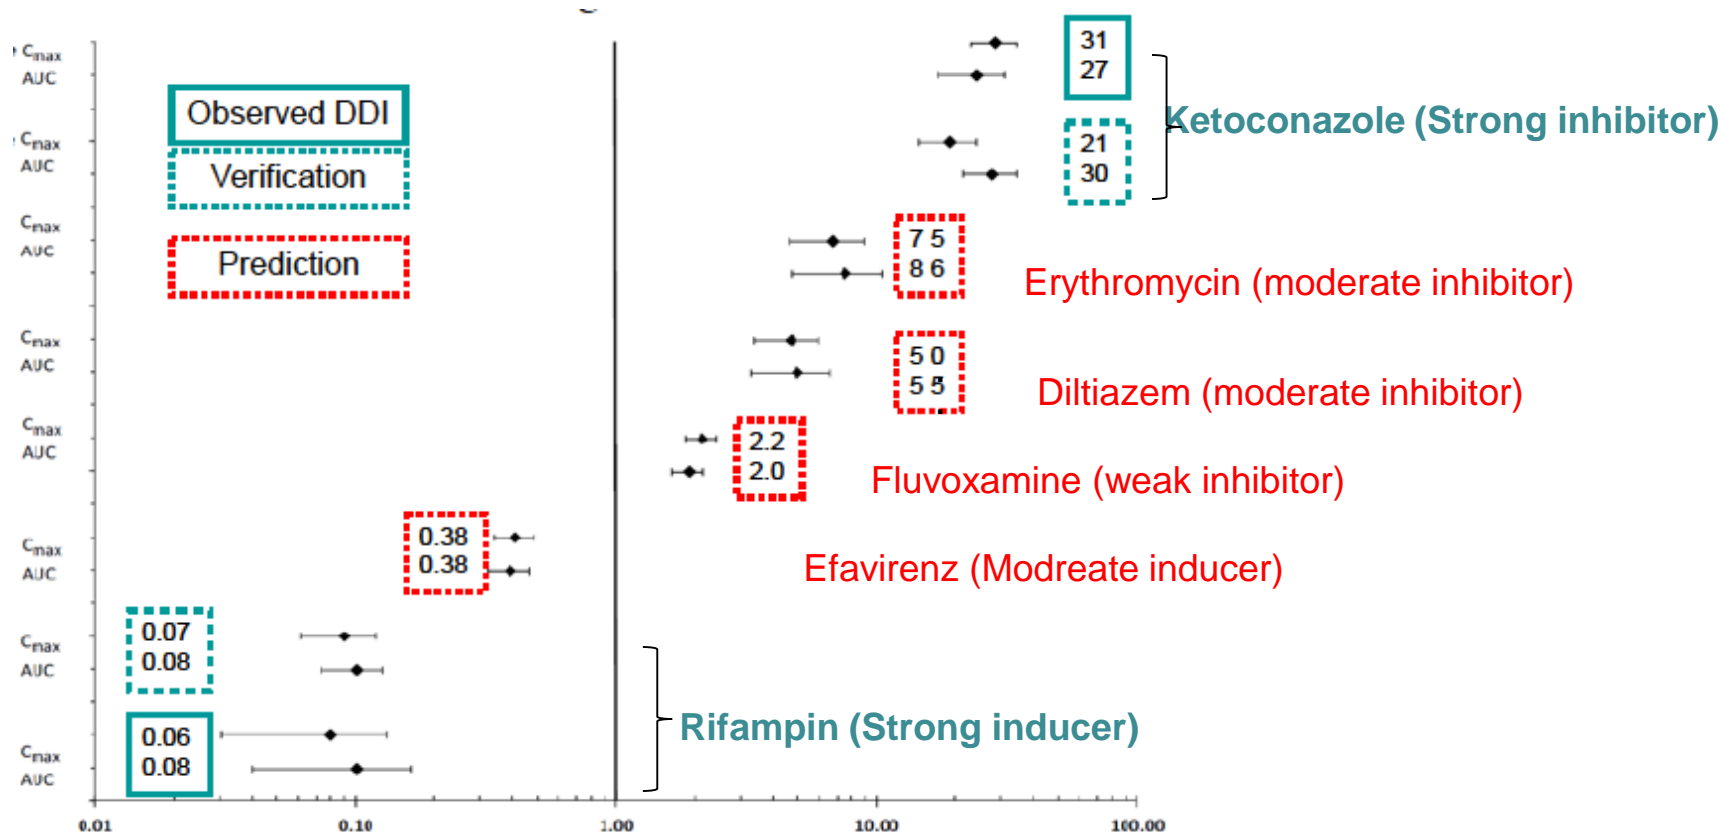

[http://www.accessdata.fda.gov/drugsatfda\\_docs/nda/2013/205552Orig1s000ClinPharmR.pdf](http://www.accessdata.fda.gov/drugsatfda_docs/nda/2013/205552Orig1s000ClinPharmR.pdf)

# Using PBPK to Predict CYP-Mediated DDI

- Sufficient dataset to demonstrate predictive performance  
[Prerequisites: substrate model predicts base PK; modulator models are verified]
- Together support a generalized WORKFLOW\* of using PBPK:

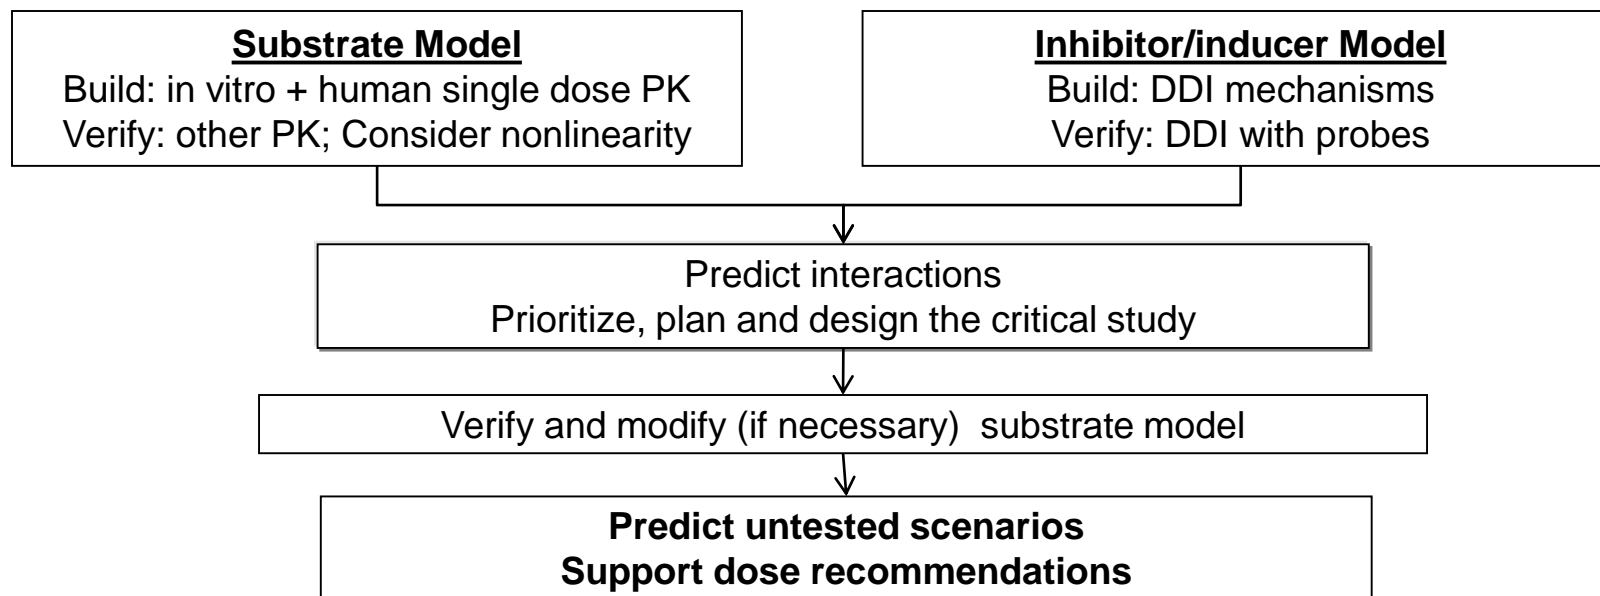

\*Core message of the three publications:

MdLT Viera, *Pharmacol Ther*, 2014

Wagner, *Clin Pharmacokinet* 2015

Wagner, *Clin Pharmacokinet Online* 2015

# Ensure Evidence-based, Consistent, and Quality Review Products to Support Decisions

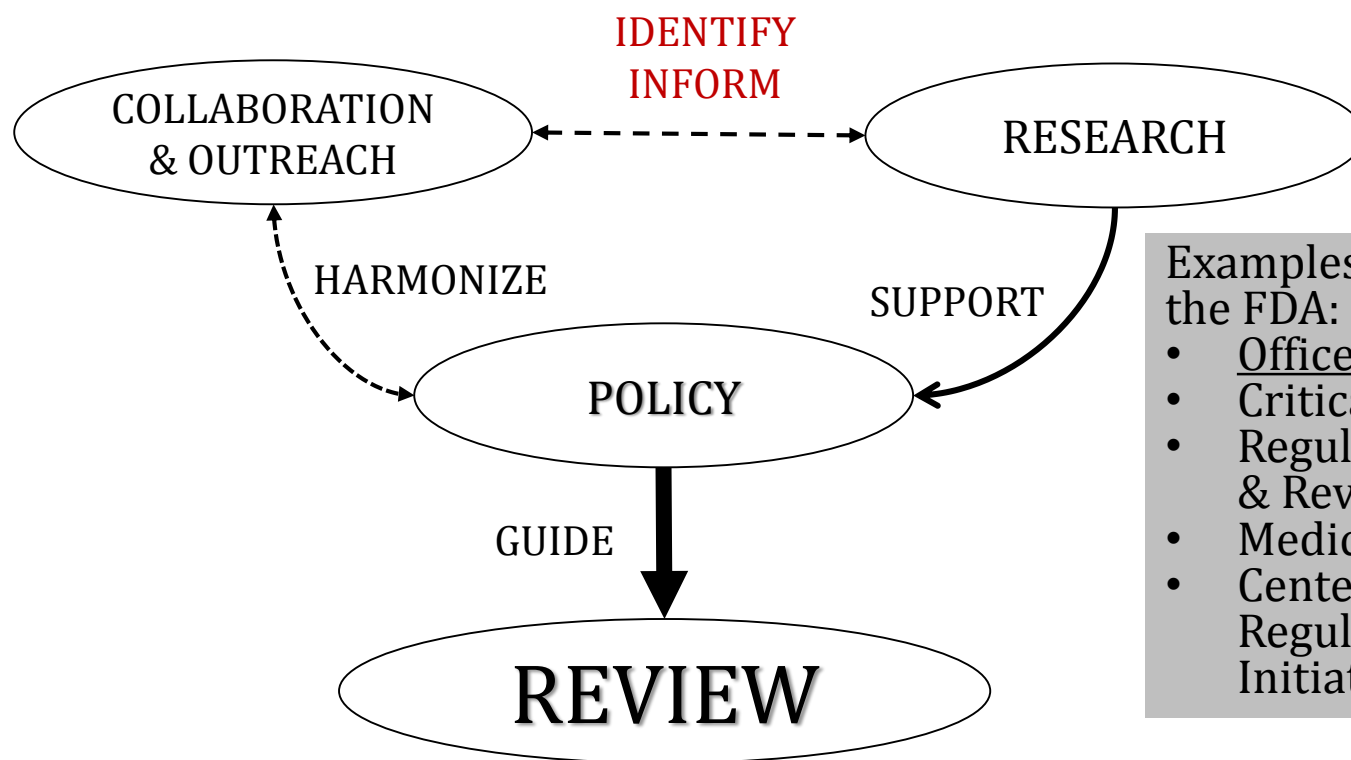

Examples of Research Grants at the FDA:

- Office of Women's Health
- Critical Path
- Regulatory Science Research & Review Enhancement
- Medical Countermeasures
- Center for Excellence in Regulatory Science Initiatives

# Collaboration is key to future successes

-Work with the larger scientific community on developing solutions

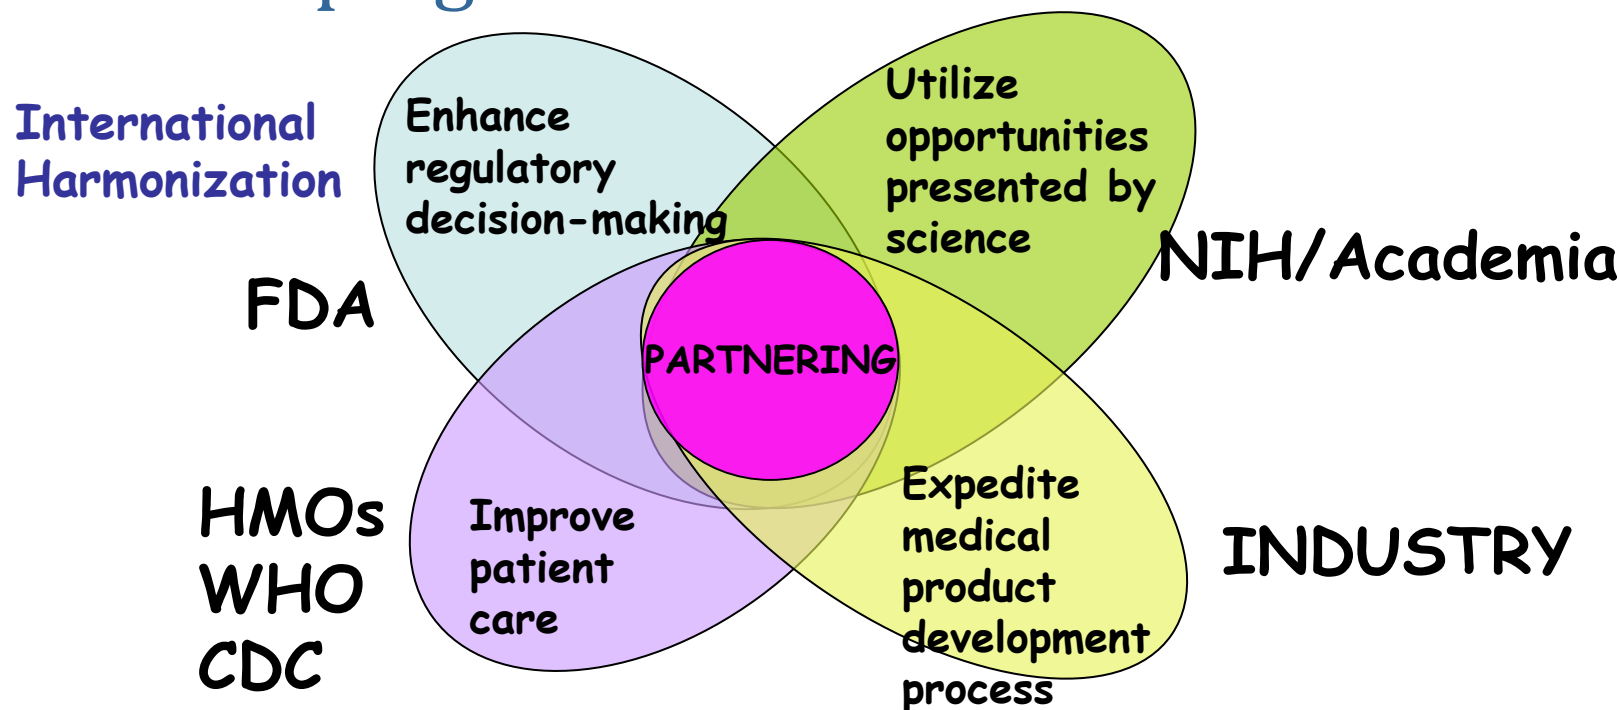

*S Buckman, S-M Huang, S Murphy, Clin Pharmacol & Ther, 81(2): 141-144, Feb 2007 (figure 1; adapted from figure supplied courtesy of RM Long, NIH)*

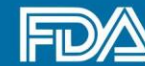

**Thank you**
